# Supplementary material for: Long-term and transgenerational phenotypic, transcriptional and metabolic effects in rabbit males born following vitrified embryo transfer
Source: PubMed Central journal article supplement (PMC7347584; doi:10.1038/s41598-020-68195-9), 2020-07-09
Supplement: 41598_2020_68195_MOESM1_ESM.pdf [file 41598_2020_68195_MOESM1_ESM.pdf]

## SUPPLEMENTARY MATERIAL

### **Long-term and transgenerational phenotypic, transcriptional and metabolic effects in rabbit males born following vitrified embryo transfer**

Ximo Garcia-Dominguez<sup>1</sup>, Francisco Marco-Jiménez<sup>1,+</sup>, David S Peñaranda<sup>1</sup>, Gianfranco Diretto<sup>2</sup>, Víctor Garcia-Carpintero<sup>3</sup>, Joaquín Cañizares<sup>3</sup>, Jose S Vicente<sup>1,+,\*</sup>

<sup>1</sup>Laboratory of Biotechnology of Reproduction, Institute for Animal Science and Technology (ICTA), Universitat Politècnica de València, 46022 Valencia, Spain.

<sup>2</sup>National Agency for New Technologies, Energy and Sustainable Economic Development (ENEA), Casaccia Research Centre, 00123 Rome, Italy.

<sup>3</sup>Institute for the Conservation and Breeding of Agricultural Biodiversity (COMAV-UPV), Universitat Politècnica de València, 46022 Valencia, Spain.

**Supplementary Table S1.** Descriptive analysis of the evaluated quantitative traits.

|  | <b>Traits</b>                                    | <b>n</b> | <b>Mean</b> | <b>SEM</b> | <b>SD</b> |
|--|--------------------------------------------------|----------|-------------|------------|-----------|
|  | <b>Litter size* (pups)</b>                       | 67       | 5.8         | 0.30       | 2.4       |
|  | Weaning (4 weeks)                                | 160      | 650.3       | 13.88      | 179.6     |
|  | <b>Body weight (g)</b> Prepuberty (9 weeks)      | 154      | 2302.5      | 29.72      | 368.9     |
|  | Adult (56 weeks)                                 | 135      | 5566.7      | 56.58      | 657.4     |
|  | <b>Growth (g/day)</b> Average weight gain        | 154      | 47.0        | 0.56       | 6.9       |
|  | Liver                                            | 126      | 104.4       | 1.67       | 18.8      |
|  | Heart                                            | 120      | 12.7        | 0.28       | 3.0       |
|  | Lungs                                            | 127      | 25.5        | 0.70       | 7.9       |
|  | <b>Organ weight (g)</b> Spleen                   | 127      | 1.3         | 0.04       | 0.4       |
|  | Kidneys                                          | 128      | 22.8        | 0.25       | 2.8       |
|  | Gonads                                           | 128      | 8.7         | 0.26       | 3.0       |
|  | Adrenal Glands                                   | 127      | 0.6         | 0.02       | 0.2       |
|  | VOL (mL)                                         | 633      | 0.7         | 0.02       | 0.4       |
|  | CON (10 <sup>6</sup> )                           | 630      | 242.1       | 6.37       | 159.9     |
|  | TSE (10 <sup>6</sup> spz)                        | 623      | 145.8       | 4.34       | 108.4     |
|  | MOT (%)                                          | 619      | 68.7        | 1.03       | 25.6      |
|  | PRO (%)                                          | 633      | 39.8        | 0.77       | 19.4      |
|  | VIA (%)                                          | 615      | 75.5        | 0.45       | 11.2      |
|  | NAR (%)                                          | 605      | 90.8        | 0.26       | 6.4       |
|  | ABN (%)                                          | 626      | 20.7        | 0.36       | 9.1       |
|  | <b>Sperm traits</b> VCL ( $\mu\text{m s}^{-1}$ ) | 636      | 98.1        | 0.84       | 21.1      |
|  | VSL ( $\mu\text{m s}^{-1}$ )                     | 638      | 42.2        | 0.57       | 14.3      |
|  | VAP ( $\mu\text{m s}^{-1}$ )                     | 636      | 60.4        | 0.67       | 16.8      |
|  | LIN (%)                                          | 631      | 43.8        | 0.63       | 15.9      |
|  | STR (%)                                          | 627      | 69.1        | 0.38       | 9.6       |
|  | WOB (%)                                          | 634      | 61.6        | 0.50       | 12.6      |
|  | ALH ( $\mu\text{m}$ )                            | 625      | 2.9         | 0.02       | 0.6       |
|  | BCF (Hz)                                         | 620      | 11.2        | 0.08       | 2.0       |
|  | Live births <sup>#</sup> (pups)                  | 383      | 5.5         | 0.18       | 3.2       |

**n** is the number of data in each trait; \* Litter size is the number of pups per parity that constituted each generation; **VOL**: Ejaculate volume; **CON**: Spermatic concentration; **TSE**: Total sperm per ejaculate; **spz**: spermatozoa; **MOT**: Percentage of sperm motility; **PRO**: Percentage of progressive motility; **VIA**: Percentage of viable sperm; **NAR**: percentage of normal apical ridge; **ABN**: Percentage of abnormal forms; **VCL**: Curvilinear velocity; **VSL**: straight-line velocity; **VAP**: average path velocity; **LIN**: linearity coefficient ( $\text{VSL}/\text{VCL} \times 100$ ); **STR**: straightness coefficient; **WOB**: wobble coefficient ( $\text{VSL}/\text{VAP} \times 100$ ); **ALH**: amplitude of lateral head displacement; **BCF**: beat cross-frequency; <sup>#</sup> Live births is the number of live pups derived from the male fertility study in each generation.

**Supplementary Table S2.** Bayesian analyses of the phenotypic differences between naturally-conceived animals (NC group) and those derived from vitrified-transferred embryos (VT group) during three generations (F1, F2 and F3), computed as NC-VT.

| PHENOTYPIC TRAITS <sup>+</sup> | D <sub>NC-VT</sub> |               |               | R   | P <sub>0</sub> |      |      | HPD <sub>95%</sub> |               |               |
|--------------------------------|--------------------|---------------|---------------|-----|----------------|------|------|--------------------|---------------|---------------|
|                                | F1                 | F2            | F3            |     | F1             | F2   | F3   | F1                 | F2            | F3            |
| Litter size (pups)             | <b>0.2</b>         | <b>0.5</b>    | <b>-0.3</b>   | 1   | 0.58           | 0.67 | 0.58 | -1.7, 2.1          | -1.9, 2.9     | -3.2, 2.5     |
| Weaning body weight (g)        | <b>62.2*</b>       | <b>-26.7</b>  | <b>59.4</b>   | 60  | 0.94           | 0.66 | 0.94 | -16.6, 135.6       | -152.9, 109.1 | -17.9, 134.9  |
| Prepuberty body weight (g)     | <b>370.1*</b>      | <b>139.3*</b> | <b>287.9*</b> | 123 | 1.00           | 0.85 | 1.00 | 210.1, 524.2       | -119.5, 405.2 | 138.1, 422.5  |
| Average weight gain (g/day)    | <b>8.6*</b>        | <b>4.7*</b>   | <b>6.6*</b>   | 2   | 1.00           | 0.97 | 1.00 | 5.9, 11.3          | 0.18, 10.3    | 3.7, 9.4      |
| Adult body weight (g)          | <b>437.4*</b>      | <b>249.5*</b> | <b>247.9*</b> | 219 | 0.99           | 0.87 | 0.91 | 65.5, 801.4        | -229.7, 704.3 | -129.5, 610.0 |
| Liver (g)                      | <b>9.3*</b>        | <b>12.7*</b>  | <b>-16.1*</b> | 6   | 0.99           | 1.00 | 1.00 | 2.2, 16.5          | 4.3, 20.6     | -26.7, -6.0   |
| Heart (g)                      | <b>1.5*</b>        | <b>3.1*</b>   | <b>0.3</b>    | 1   | 0.98           | 0.93 | 0.73 | 0.1, 2.6           | -1.3, 7.6     | -0.6, 1.2     |
| Lungs (g)                      | <b>-1.1</b>        | <b>-3.7*</b>  | <b>-2.3</b>   | 3   | 0.73           | 0.81 | 0.90 | -4.6, 2.3          | -12.9, 4.3    | -5.5, 1.3     |
| Spleen (g)                     | <b>0.1</b>         | <b>0.0</b>    | <b>-0.2*</b>  | 0.1 | 0.65           | 0.50 | 0.99 | -0.2, 0.3          | -0.4, 0.5     | -0.4, -0.1    |
| Kidneys (g)                    | <b>0.4</b>         | <b>0.8</b>    | <b>-1.0</b>   | 1   | 0.71           | 0.95 | 0.96 | -1.0, 1.7          | -0.2, 1.8     | -2.2, 0.1     |
| Gonads (g)                     | <b>-0.7</b>        | <b>0.7</b>    | <b>-1.0</b>   | 1   | 0.93           | 0.71 | 0.93 | -1.8, 0.2          | -1.8, 3.1     | -2.4, 0.4     |
| A. Glands (g)                  | <b>-0.0</b>        | <b>0.0</b>    | <b>0.1</b>    | 0.1 | 0.58           | 0.52 | 0.98 | -0.1, 0.1          | -0.2, 0.18    | 0.0, 0.2      |

<sup>+</sup>Litter size (of births that originate each generation); Weaning (4 weeks of age); Prepuberty (9 weeks of age); Adulthood (56 weeks of age).

D<sub>NC-VT</sub> = Mean of the difference NC-VT (median of the marginal posterior distribution of the difference between the NC and the VT groups).

R = Relevant value (proposed as one-third of the SD of the trait), rounded to the first significant number.

P<sub>0</sub> = Probability of the difference (D<sub>NC-VT</sub>) being greater than 0 when D<sub>NC-VT</sub> > 0 or lower than 0 when D<sub>NC-VT</sub> < 0.

HPD<sub>95%</sub> = The highest posterior density region at 95% of probability.

\*Statistical differences were assumed if |D<sub>NC-VT</sub>| surpass R value and its P<sub>0</sub> > 0.80.

**Supplementary Table S3.** Bayesian analyses of the sperm/fertility traits differences between naturally-conceived males (NC group) and those derived from vitrified-transferred embryos (VT group) during three generations (F1, F2 and F3), computed as NC-VT.

|                              | $D_{NC-VT}$   |               |              | R   | $P_0$ |      |      | HPD <sub>95%</sub> |              |             |
|------------------------------|---------------|---------------|--------------|-----|-------|------|------|--------------------|--------------|-------------|
|                              | F1            | F2            | F3           |     | F1    | F2   | F3   | F1                 | F2           | F3          |
| <b>SEMEN PARAMETERS</b>      |               |               |              |     |       |      |      |                    |              |             |
| VOL (mL)                     | <b>-0.2*</b>  | <b>-0.2*</b>  | <b>0.1</b>   | 0.1 | 1.00  | 1.00 | 0.99 | -0.3, -0.1         | -0.3, -0.1   | 0.0, 0.1    |
| CON (10 <sup>6</sup> )       | <b>37.0</b>   | <b>8.9</b>    | <b>-1.8</b>  | 53  | 0.97  | 0.76 | 0.53 | -0.9, 72.6         | -15.6, 33.7  | -51.9, 44.6 |
| TSE (10 <sup>6</sup> spz)    | <b>-22.1</b>  | <b>-44.8*</b> | <b>19.3</b>  | 36  | 0.89  | 1.00 | 0.96 | -60.0, 13.8        | -64.3, -24.9 | -3.0, 40.2  |
| MOT (%)                      | <b>-5.0</b>   | <b>1.5</b>    | <b>-1.7</b>  | 9   | 0.99  | 0.94 | 0.68 | -9.3, -0.3         | -0.3, 3.5    | -9.1, 4.9   |
| PRO (%)                      | <b>-2.5</b>   | <b>-3.9</b>   | <b>-2.0</b>  | 6   | 0.89  | 0.98 | 0.80 | -6.5, 1.7          | -7.7, -0.2   | -6.7, 2.7   |
| VIA (%)                      | <b>0.4</b>    | <b>-0.4</b>   | <b>-0.1</b>  | 4   | 0.62  | 0.65 | 0.53 | -2.3, 3.0          | -2.4, 1.7    | -3.4, 3.1   |
| ABN (%)                      | <b>-1.1</b>   | <b>3.4*</b>   | <b>-0.3</b>  | 3   | 0.83  | 1.00 | 0.58 | -3.6, 1.1          | 1.7, 5.3     | -3.1, 2.2   |
| NAR (%)                      | <b>0.0</b>    | <b>0.1</b>    | <b>0.7</b>   | 2   | 0.52  | 0.57 | 0.80 | -1.9, 2.0          | -1.6, 1.6    | -0.8, 2.3   |
| <b>MOTION PARAMETERS</b>     |               |               |              |     |       |      |      |                    |              |             |
| VCL ( $\mu\text{m s}^{-1}$ ) | <b>-13.3*</b> | <b>3.5</b>    | <b>8.1*</b>  | 7   | 1.00  | 0.95 | 1.00 | -19.0, -7.8        | -0.6, 7.8    | 2.2, 14.0   |
| VSL ( $\mu\text{m s}^{-1}$ ) | <b>-5.5*</b>  | <b>0.7</b>    | <b>0.6</b>   | 5   | 1.00  | 0.65 | 0.63 | -8.9, -2.1         | -2.7, 4.1    | -2.8, 3.9   |
| VAP ( $\mu\text{m s}^{-1}$ ) | <b>-10.0*</b> | <b>1.2</b>    | <b>2.4</b>   | 6   | 1.00  | 0.72 | 0.88 | -14.4, -5.4        | -2.7, 4.9    | -1.5, 6.3   |
| LIN (%)                      | <b>-1.7</b>   | <b>1.7</b>    | <b>-1.9</b>  | 5   | 0.74  | 0.90 | 0.92 | -6.7, 3.2          | -0.8, 4.6    | -4.7, 0.9   |
| STR (%)                      | <b>1.8</b>    | <b>1.7</b>    | <b>-1.5</b>  | 3   | 0.92  | 1.00 | 0.88 | -0.9, 4.3          | 0.5, 3.0     | -4.2, 0.9   |
| WOB (%)                      | <b>-2.1</b>   | <b>-0.9</b>   | <b>-1.8</b>  | 4   | 0.90  | 0.73 | 0.91 | -5.2, 1.1          | -3.8, 1.9    | -4.4, 0.7   |
| ALH ( $\mu\text{m}$ )        | <b>-0.1</b>   | <b>0.0</b>    | <b>0.2</b>   | 0.2 | 0.98  | 0.73 | 0.99 | -0.3, -0.0         | -0.1, 0.2    | 0.0, 0.4    |
| BCF (Hz)                     | <b>-0.4</b>   | <b>0.0</b>    | <b>0.4</b>   | 1   | 0.96  | 0.56 | 0.90 | -0.8, 0.1          | -0.5, 0.6    | -0.2, 0.9   |
| <b>Litter size</b>           |               |               |              |     |       |      |      |                    |              |             |
| Live births (pups)           | <b>-1.1*</b>  | <b>-1.1*</b>  | <b>-2.8*</b> | 1   | 0.94  | 0.99 | 1.00 | -2.6, 0.3          | -2.1, -0.1   | -5.0, -0.8  |

$D_{NC-VT}$  = Mean of the difference NC-VT (median of the marginal posterior distribution of the difference between the NC and the VT groups).

R = Relevant value (proposed as one-third of the SD of the trait), rounded to the first significant number.

$P_0$  = Probability of the difference ( $D_{NC-VT}$ ) being greater than 0 when  $D_{NC-VT} > 0$  or lower than 0 when  $D_{NC-VT} < 0$ .

HPD<sub>95%</sub> = The highest posterior density region at 95% of probability.

\*Statistical differences were assumed if  $|D_{NC-VT}|$  surpass R value and its  $P_0 > 0.80$ .

**Supplementary Table S4.** Differentially expressed transcripts in liver tissue between animals born from vitrified- transferred embryos and those conceived naturally.

| Gene accession     | Gene name                                                             | Fold change |
|--------------------|-----------------------------------------------------------------------|-------------|
| ENSOCUG00000025868 | gamma-aminobutyric acid type A receptor delta subunit(GABRD)          | -7,00       |
| ENSOCUG00000015329 | matrix metalloproteinase 7(MMP7)                                      | -5,52       |
| ENSOCUG00000021126 | Metallothionein-2A(LOC100343299)                                      | -5,27       |
| ENSOCUG00000003467 | prostate stem cell antigen(PSCA)                                      | -5,13       |
| ENSOCUG00000004004 | family with sequence similarity 135 member B(FAM135B)                 | -4,78       |
| ENSOCUG00000011488 | Fanconi anemia complementation group I(FANCI)                         | -4,34       |
| ENSOCUG00000027388 | UDP-GlcNAc:betaGal beta-1,3-N-acetylglucosaminyltransferase 8(B3GNT8) | -4,24       |
| ENSOCUG00000010513 | centrosomal protein 55(CEP55)                                         | -4,23       |
| ENSOCUG00000005159 | anillin actin binding protein(ANLN)                                   | -4,15       |
| ENSOCUG00000008303 | matrix metalloproteinase 12(MMP12)                                    | -4,15       |
| ENSOCUG00000002934 | zinc finger protein 280C(ZNF280C)                                     | -4,10       |
| ENSOCUG00000001891 | glycerol-3-phosphate acyltransferase 2, mitochondrial(GPAT2)          | -4,02       |
| ENSOCUG00000017659 | alanyl aminopeptidase, membrane(ANPEP)                                | -4,00       |
| ENSOCUG00000006444 | CD109 molecule(CD109)                                                 | -3,99       |
| ENSOCUG00000000374 | ADAM metalloproteinase with thrombospondin type 1 motif 15(ADAMTS15)  | -3,96       |
| ENSOCUG00000005115 | fibroblast activation protein alpha(FAP)                              | -3,91       |
| ENSOCUG00000002542 | solute carrier family 22 member 2(SLC22A2)                            | -3,84       |
| ENSOCUG00000013111 | procollagen C-endopeptidase enhancer 2(PCOLCE2)                       | -3,82       |
| ENSOCUG00000001726 | Wnt family member 11(WNT11)                                           | -3,81       |
| ENSOCUG00000012881 | collagen type I alpha 1 chain(COL1A1)                                 | -3,77       |
| ENSOCUG00000024161 | potassium voltage-gated channel subfamily J member 15(KCNJ15)         | -3,70       |
| ENSOCUG00000013577 | family with sequence similarity 171 member A2(FAM171A2)               | -3,70       |
| ENSOCUG00000021209 | metallothionein-2D(LOC100343557)                                      | -3,69       |
| ENSOCUG00000002945 | mesenchyme homeobox 1(MEOX1)                                          | -3,67       |
| ENSOCUG00000015320 | collagen type XII alpha 1 chain(COL12A1)                              | -3,63       |
| ENSOCUG00000021508 | chromosome 16 open reading frame, human C1orf106(C16H1orf106)         | -3,62       |
| ENSOCUG00000017320 | ring finger protein 224(RNF224)                                       | -3,59       |
| ENSOCUG00000000856 | E2F transcription factor 1(E2F1)                                      | -3,59       |
| ENSOCUG00000001171 | NUF2, NDC80 kinetochore complex component(NUF2)                       | -3,57       |
| ENSOCUG00000000360 | cadherin 6(CDH6)                                                      | -3,51       |
| ENSOCUG00000001719 | diaphanous related formin 3(DIAPH3)                                   | -3,51       |
| ENSOCUG00000002407 | microfibrillar associated protein 5(MFAP5)                            | -3,48       |
| ENSOCUG00000022280 | transmembrane protein 45B(TMEM45B)                                    | -3,47       |
| ENSOCUG00000016157 | exonuclease 1(LOC100338764)                                           | -3,46       |
| ENSOCUG00000001376 | sodium channel protein type 11 subunit alpha(LOC100349709)            | -3,46       |
| ENSOCUG00000029235 | metallothionein-1A(LOC100343802)                                      | -3,44       |
| ENSOCUG00000025499 | uncharacterized protein CXorf21-like(LOC100345885)                    | -3,43       |
| ENSOCUG00000010144 | tetratricopeptide repeat domain 22(TTC22)                             | -3,39       |
| ENSOCUG00000001652 | cyclin B2(CCNB2)                                                      | -3,38       |
| ENSOCUG00000001962 | 4-hydroxyphenylpyruvate dioxygenase like(HPDL)                        | -3,37       |
| ENSOCUG00000013140 | calmodulin binding transcription activator 1(CAMTA1)                  | -3,33       |
| ENSOCUG00000004616 | myotubularin related protein 11(MTMR11)                               | -3,32       |

|                    |                                                                     |       |
|--------------------|---------------------------------------------------------------------|-------|
| ENSOCUG00000017111 | kinesin family member 4A(KIF4A)                                     | -3,31 |
| ENSOCUG00000013056 | zinc finger protein 804B(ZNF804B)                                   | -3,30 |
| ENSOCUG00000002924 | galectin 3(LGALS3)                                                  | -3,29 |
| ENSOCUG00000000120 | ADCYAP receptor type I(ADCYAP1R1)                                   | -3,28 |
| ENSOCUG00000003649 | transmembrane and immunoglobulin domain containing 1(TMIGD1)        | -3,27 |
| ENSOCUG00000000699 | centromere protein E(CENPE)                                         | -3,23 |
| ENSOCUG00000015492 | glucagon like peptide 2 receptor(GLP2R)                             | -3,21 |
| ENSOCUG00000005788 | solute carrier family 22 member 7(SLC22A7)                          | -3,20 |
| ENSOCUG00000022624 | solute carrier family 26 member 9(SLC26A9)                          | -3,18 |
| ENSOCUG00000010814 | malic enzyme 1(ME1)                                                 | -3,16 |
| ENSOCUG00000006258 | WD repeat domain 72(WDR72)                                          | -3,15 |
| ENSOCUG00000017347 | leptin receptor(LEPR)                                               | -3,15 |
| ENSOCUG00000029254 | family with sequence similarity 159 member A(FAM159A)               | -3,14 |
| ENSOCUG00000011025 | contactin 4(CNTN4)                                                  | -3,13 |
| ENSOCUG00000021051 | rippy transcriptional repressor 3(RIPPLY3)                          | -3,12 |
| ENSOCUG00000023285 | trophinin associated protein(TROAP)                                 | -3,12 |
| ENSOCUG00000013412 | C-C motif chemokine 7(LOC103351517)                                 | -3,09 |
| ENSOCUG00000007151 | cilia and flagella associated protein 70(CFAP70)                    | -3,07 |
| ENSOCUG00000005507 | G protein subunit alpha 14(GNA14)                                   | -3,06 |
| ENSOCUG00000017689 | keratin 20(KRT20)                                                   | -3,06 |
| ENSOCUG00000008329 | ADAM metallopeptidase with thrombospondin type 1 motif 19(ADAMTS19) | -3,06 |
| ENSOCUG00000008179 | rhomboid like 3(RHBDL3)                                             | -3,03 |
| ENSOCUG00000015410 | NDC80, kinetochore complex component(NDC80)                         | -3,03 |
| ENSOCUG00000000215 | period circadian clock 2(PER2)                                      | -3,03 |
| ENSOCUG00000006186 | carboxypeptidase X, M14 family member 1(CPXM1)                      | -3,01 |
| ENSOCUG00000009880 | dual specificity phosphatase 14(DUSP14)                             | -3,00 |
| ENSOCUG00000006613 | spermatogenesis associated 1(SPATA1)                                | -2,99 |
| ENSOCUG00000022883 | glycerophosphodiester phosphodiesterase domain containing 3(GDPD3)  | -2,99 |
| ENSOCUG00000025494 | secretogranin III(SCG3)                                             | -2,98 |
| ENSOCUG00000022659 | EF-hand and coiled-coil domain containing 1(EFCC1)                  | -2,98 |
| ENSOCUG00000006673 | alpha 1,4-galactosyltransferase(A4GALT)                             | -2,97 |
| ENSOCUG00000016942 | aldehyde dehydrogenase 1 family member A2(ALDH1A2)                  | -2,95 |
| ENSOCUG00000023005 | zinc finger protein 367(ZNF367)                                     | -2,93 |
| ENSOCUG00000013801 | SHC binding and spindle associated 1(SHCBP1)                        | -2,93 |
| ENSOCUG00000026551 | lysophosphatidic acid receptor 5(LPAR5)                             | -2,90 |
| ENSOCUG00000004480 | cysteine and glycine rich protein 3(CSRP3)                          | -2,89 |
| ENSOCUG00000016718 | mesenteric estrogen dependent adipogenesis(MEDAG)                   | -2,87 |
| ENSOCUG00000026610 | transmembrane protein 100(TMEM100)                                  | -2,86 |
| ENSOCUG00000010272 | acid phosphatase, prostate(ACPP)                                    | -2,86 |
| ENSOCUG00000012902 | glutathione S-transferase Yc(LOC100353428)                          | -2,85 |
| ENSOCUG00000011042 | collagen type VIII alpha 2 chain(COL8A2)                            | -2,85 |
| ENSOCUG00000024465 | collagen type VIII alpha 1 chain(COL8A1)                            | -2,80 |
| ENSOCUG00000017859 | RNA binding motif protein 46(RBM46)                                 | -2,80 |
| ENSOCUG00000017387 | claspin(CLSPN)                                                      | -2,78 |
| ENSOCUG00000011340 | cell division cycle 20(CDC20)                                       | -2,76 |
| ENSOCUG00000015483 | fatty acid binding protein 4(FABP4)                                 | -2,75 |
| ENSOCUG00000005747 | collagen type XVI alpha 1 chain(COL16A1)                            | -2,74 |
| ENSOCUG00000006962 | aldehyde dehydrogenase 1 family member L2(ALDH1L2)                  | -2,73 |

|                    |                                                                         |       |
|--------------------|-------------------------------------------------------------------------|-------|
| ENSOCUG00000011027 | chitinase 1(CHIT1)                                                      | -2,70 |
| ENSOCUG00000011350 | spondin 1(SPON1)                                                        | -2,66 |
| ENSOCUG00000015838 | collagen type IX alpha 2 chain(COL9A2)                                  | -2,66 |
| ENSOCUG00000004393 | synaptotagmin-15(LOC100351528)                                          | -2,63 |
| ENSOCUG00000001627 | solute carrier family 6 member 11(SLC6A11)                              | -2,62 |
| ENSOCUG00000009332 | mucolipin 3(MCOLN3)                                                     | -2,62 |
| ENSOCUG00000015214 | PSMC3 interacting protein(PSMC3IP)                                      | -2,60 |
| ENSOCUG00000007172 | acyl-CoA desaturase(LOC100357419)                                       | -2,59 |
| ENSOCUG00000010941 | carboxypeptidase X, M14 family member 2(CPXM2)                          | -2,58 |
| ENSOCUG00000017197 | claudin 6(CLDN6)                                                        | -2,57 |
| ENSOCUG00000012176 | ubiquitin conjugating enzyme E2 C(UBE2C)                                | -2,56 |
| ENSOCUG00000017882 | anoctamin 3(ANO3)                                                       | -2,56 |
| ENSOCUG00000004340 | cyclin B1(CCNB1)                                                        | -2,56 |
| ENSOCUG00000026482 | UDP-glucuronosyltransferase 2B16-like(LOC100340513)                     | -2,55 |
| ENSOCUG00000000236 | repulsive guidance molecule family member a(RGMA)                       | -2,54 |
| ENSOCUG00000024196 | F-box protein 17(FBXO17)                                                | -2,54 |
| ENSOCUG00000001337 | prostate androgen-regulated mucin-like protein 1(PARM1)                 | -2,52 |
| ENSOCUG00000029301 | zinc finger and SCAN domain containing 23(ZSCAN23)                      | -2,52 |
| ENSOCUG00000002173 | phosphorylase, glycogen, muscle(PYGM)                                   | -2,50 |
| ENSOCUG00000006527 | BUB1 mitotic checkpoint serine/threonine kinase B(BUB1B)                | -2,50 |
| ENSOCUG00000012264 | collagen type I alpha 2 chain(COL1A2)                                   | -2,49 |
| ENSOCUG00000017043 | cell division cycle associated 8(CDCA8)                                 | -2,49 |
| ENSOCUG00000003724 | multiple EGF like domains 10(MEGF10)                                    | -2,48 |
| ENSOCUG00000009932 | establishment of sister chromatid cohesion N-acetyltransferase 2(ESCO2) | -2,47 |
| ENSOCUG00000014730 | frizzled class receptor 2(FZD2)                                         | -2,47 |
| ENSOCUG00000005709 | phosphoglucomutase 2 like 1(PGM2L1)                                     | -2,46 |
| ENSOCUG00000025992 | butyrophilin subfamily 1 member A1-like(LOC100344369)                   | -2,46 |
| ENSOCUG00000025655 | G protein-coupled receptor 161(GPR161)                                  | -2,45 |
| ENSOCUG00000003822 | family with sequence similarity 83 member B(FAM83B)                     | -2,44 |
| ENSOCUG00000012683 | ADAM metallopeptidase domain 33(ADAM33)                                 | -2,44 |
| ENSOCUG00000012071 | glycerol-3-phosphate acyltransferase 3(GPAT3)                           | -2,44 |
| ENSOCUG00000000094 | prostacyclin synthase(LOC103346149)                                     | -2,43 |
| ENSOCUG00000002178 | nurim (nuclear envelope membrane protein)(NRM)                          | -2,42 |
| ENSOCUG00000003876 | FH2 domain containing 1(FHDC1)                                          | -2,41 |
| ENSOCUG00000017273 | patatin-like phospholipase domain-containing protein 3(LOC100344884)    | -2,39 |
| ENSOCUG00000012763 | contactin-6(LOC100348097)                                               | -2,37 |
| ENSOCUG00000002878 | SLX4 interacting protein(SLX4IP)                                        | -2,36 |
| ENSOCUG00000005592 | lumican(LUM)                                                            | -2,35 |
| ENSOCUG00000000580 | cadherin 16(CDH16)                                                      | -2,35 |
| ENSOCUG00000015162 | microfibrillar associated protein 4(MFAP4)                              | -2,34 |
| ENSOCUG00000000547 | shugoshin 2(SGO2)                                                       | -2,33 |
| ENSOCUG00000004511 | heat shock protein family B (small) member 8(HSPB8)                     | -2,32 |
| ENSOCUG00000002703 | forkhead box M1(FOXM1)                                                  | -2,32 |
| ENSOCUG00000010198 | tropomyosin 2 (beta)(TPM2)                                              | -2,30 |
| ENSOCUG00000016111 | ankyrin repeat and EF-hand domain containing 1(ANKEF1)                  | -2,27 |
| ENSOCUG00000007516 | 6-phosphofructo-2-kinase/fructose-2,6-biphosphatase 3(PFKFB3)           | -2,27 |
| ENSOCUG00000005830 | HIG1 hypoxia inducible domain family member 1A(HIGD1A)                  | -2,27 |
| ENSOCUG00000005324 | microtubule associated protein 1A(MAP1A)                                | -2,25 |

|                     |                                                                                |       |
|---------------------|--------------------------------------------------------------------------------|-------|
| ENSOCUG00000002337  | proline rich 11(PRR11)                                                         | -2,25 |
| ENSOCUG00000003165  | signal peptide, CUB and EGF-like domain-containing protein 1(LOC100344797)     | -2,24 |
| ENSOCUG000000011956 | cadherin related family member 2(CDHR2)                                        | -2,22 |
| ENSOCUG000000012232 | kin of IRRE like (Drosophila)(KIRREL)                                          | -2,21 |
| ENSOCUG000000016193 | osteomodulin(OMD)                                                              | -2,21 |
| ENSOCUG000000003030 | PARP1 binding protein(PARPBP)                                                  | -2,20 |
| ENSOCUG000000014571 | SH3 and cysteine rich domain(STAC)                                             | -2,19 |
| ENSOCUG000000029066 | transient receptor potential cation channel subfamily M member 2(LOC103347481) | -2,19 |
| ENSOCUG000000005174 | dermatopontin(DPT)                                                             | -2,19 |
| ENSOCUG000000003689 | nidogen 2(NID2)                                                                | -2,17 |
| ENSOCUG000000015893 | proprotein convertase subtilisin/kexin type 2(PCSK2)                           | -2,17 |
| ENSOCUG000000014432 | ectonucleotide pyrophosphatase/phosphodiesterase 3(ENPP3)                      | -2,17 |
| ENSOCUG000000014988 | collagen type III alpha 1 chain(COL3A1)                                        | -2,16 |
| ENSOCUG000000012275 | testis expressed 9(TEX9)                                                       | -2,15 |
| ENSOCUG000000009195 | C-type lectin domain family 4 member E(CLEC4E)                                 | -2,14 |
| ENSOCUG000000002858 | cyclin dependent kinase 1(CDK1)                                                | -2,13 |
| ENSOCUG000000004275 | semaphorin 5A(SEMA5A)                                                          | -2,12 |
| ENSOCUG000000001375 | acyl-CoA desaturase(LOC100346046)                                              | -2,11 |
| ENSOCUG000000012809 | solute carrier family 25 member 24(SLC25A24)                                   | -2,11 |
| ENSOCUG000000010936 | chromosome unknown open reading frame, human C16orf89(LOC100353142)            | -2,11 |
| ENSOCUG000000003903 | centromere protein U(CENPU)                                                    | -2,10 |
| ENSOCUG000000000092 | serpin family F member 1(SERPINF1)                                             | -2,10 |
| ENSOCUG000000009218 | phosphodiesterase 10A(PDE10A)                                                  | -2,09 |
| ENSOCUG000000029623 | ATPase plasma membrane Ca <sup>2+</sup> transporting 3(ATP2B3)                 | -2,07 |
| ENSOCUG000000017153 | transcription factor 19(TCF19)                                                 | -2,06 |
| ENSOCUG000000001825 | family with sequence similarity 171 member B(FAM171B)                          | -2,05 |
| ENSOCUG000000011970 | transgelin(TAGLN)                                                              | -2,04 |
| ENSOCUG000000002707 | MID1 interacting protein 1(MID1IP1)                                            | -2,04 |
| ENSOCUG000000013465 | TBC1 domain family member 19(TBC1D19)                                          | -2,04 |
| ENSOCUG000000007735 | FRAS1 related extracellular matrix protein 2(FREM2)                            | -2,03 |
| ENSOCUG000000004485 | E2F transcription factor 8(E2F8)                                               | -2,02 |
| ENSOCUG000000008953 | synaptopodin 2(SYNPO2)                                                         | -2,02 |
| ENSOCUG000000003254 | cyclin dependent kinase like 2(CDKL2)                                          | -2,02 |
| ENSOCUG000000014056 | dedicator of cytokinesis 5(DOCK5)                                              | -2,02 |
| ENSOCUG000000015836 | myelin protein zero like 2(MPZL2)                                              | -2,00 |
| ENSOCUG000000022348 | zinc finger and BTB domain containing 7C(ZBTB7C)                               | -2,00 |
| ENSOCUG000000016302 | alpha fetoprotein(AFP)                                                         | -2,00 |
| ENSOCUG000000017492 | centromere protein F(CENPF)                                                    | -1,99 |
| ENSOCUG000000000409 | collagen type VI alpha 2 chain(COL6A2)                                         | -1,98 |
| ENSOCUG000000000109 | ADAM metallopeptidase with thrombospondin type 1 motif 9(ADAMTS9)              | -1,97 |
| ENSOCUG000000015790 | kinesin family member 20A(KIF20A)                                              | -1,97 |
| ENSOCUG000000006973 | adhesion G protein-coupled receptor E2(ADGRE2)                                 | -1,97 |
| ENSOCUG000000013450 | myosin heavy chain 11(MYH11)                                                   | -1,97 |
| ENSOCUG000000005503 | spindle apparatus coiled-coil protein 1(SPDL1)                                 | -1,96 |
| ENSOCUG000000000847 | protein tyrosine phosphatase, receptor type D(PTPRD)                           | -1,96 |
| ENSOCUG000000000313 | ovostatin homolog 2(LOC100348825)                                              | -1,96 |
| ENSOCUG000000013062 | acyl-CoA synthetase long-chain family member 6(ACSL6)                          | -1,95 |
| ENSOCUG000000016236 | collagen type XV alpha 1 chain(COL15A1)                                        | -1,94 |



|                    |                                                                 |       |
|--------------------|-----------------------------------------------------------------|-------|
| ENSOCUG00000011244 | extra spindle pole bodies like 1, separase(ESPL1)               | -1,93 |
| ENSOCUG00000015756 | kinetochore scaffold 1(KNL1)                                    | -1,91 |
| ENSOCUG00000013757 | solute carrier family 13 member 2(SLC13A2)                      | -1,90 |
| ENSOCUG00000010184 | trehalase(TREH)                                                 | -1,90 |
| ENSOCUG00000017620 | serum amyloid protein A(LOC100009259)                           | -1,89 |
| ENSOCUG00000017867 | Fraser extracellular matrix complex subunit 1(FRAS1)            | -1,88 |
| ENSOCUG00000012148 | inositol 1,4,5-trisphosphate receptor type 1(ITPR1)             | -1,88 |
| ENSOCUG00000013414 | RasGEF domain family member 1C(RASGEF1C)                        | -1,88 |
| ENSOCUG00000025273 | liver carboxylesterase 2(LOC100343300)                          | -1,87 |
| ENSOCUG00000003277 | nucleolar and spindle associated protein 1(NUSAP1)              | -1,86 |
| ENSOCUG00000005560 | G protein subunit alpha transducin 2(GNAT2)                     | -1,84 |
| ENSOCUG00000025241 | liver carboxylesterase 2-like(LOC100357214)                     | -1,84 |
| ENSOCUG00000016303 | sulfotransferase family, cytosolic, 1C, member 2(SULT1C2)       | -1,83 |
| ENSOCUG00000024055 | melanoma cell adhesion molecule(MCAM)                           | -1,83 |
| ENSOCUG00000008571 | myomesin 1(MYOM1)                                               | -1,83 |
| ENSOCUG00000008236 | lipoprotein lipase(LPL)                                         | -1,82 |
| ENSOCUG00000025132 | 60S ribosomal protein L23a(LOC108177184)                        | -1,82 |
| ENSOCUG00000005521 | G protein-coupled bile acid receptor 1(GPBAR1)                  | -1,81 |
| ENSOCUG00000006131 | SPARC like 1(SPARCL1)                                           | -1,81 |
| ENSOCUG00000029071 | zinc finger protein 81(ZNF81)                                   | -1,80 |
| ENSOCUG00000006714 | matrix metalloproteinase 2(MMP2)                                | -1,80 |
| ENSOCUG00000001785 | syntaxin 19(STX19)                                              | -1,78 |
| ENSOCUG00000017585 | family with sequence similarity 105 member A(FAM105A)           | -1,78 |
| ENSOCUG00000005885 | immunoglobulin superfamily member 10(IGSF10)                    | -1,78 |
| ENSOCUG00000005774 | zinc finger protein 521(ZNF521)                                 | -1,77 |
| ENSOCUG00000002468 | kinesin family member 20B(KIF20B)                               | -1,77 |
| ENSOCUG00000002814 | topoisomerase (DNA) II alpha(TOP2A)                             | -1,76 |
| ENSOCUG00000005540 | calpain 6(CAPN6)                                                | -1,75 |
| ENSOCUG00000012372 | lipin 3(LPIN3)                                                  | -1,75 |
| ENSOCUG00000016909 | RAD51 recombinase(RAD51)                                        | -1,75 |
| ENSOCUG00000021287 | heat shock protein family B (small) member 6(HSPB6)             | -1,75 |
| ENSOCUG00000023917 | early B-cell factor 4(EBF4)                                     | -1,74 |
| ENSOCUG00000007545 | EPH receptor B6(EPHB6)                                          | -1,74 |
| ENSOCUG00000005820 | ribonucleotide reductase regulatory subunit M2(RRM2)            | -1,73 |
| ENSOCUG00000010046 | thymidine kinase 1(TK1)                                         | -1,73 |
| ENSOCUG00000003203 | TPX2, microtubule nucleation factor(TPX2)                       | -1,72 |
| ENSOCUG00000001754 | formin like 3(FMNL3)                                            | -1,70 |
| ENSOCUG00000013175 | fibulin 5(FBLN5)                                                | -1,70 |
| ENSOCUG00000012031 | pleckstrin 2(PLEK2)                                             | -1,70 |
| ENSOCUG00000014077 | latent transforming growth factor beta binding protein 2(LTBP2) | -1,69 |
| ENSOCUG00000000161 | SH3 domain binding protein 2(SH3BP2)                            | -1,69 |
| ENSOCUG00000017717 | grainyhead like transcription factor 1(GRHL1)                   | -1,68 |
| ENSOCUG00000016964 | matrix Gla protein(MGP)                                         | -1,68 |
| ENSOCUG00000002874 | protein tyrosine kinase 7 (inactive)(PTK7)                      | -1,68 |
| ENSOCUG00000015111 | glutamate ionotropic receptor NMDA type subunit 2B(GRIN2B)      | -1,68 |
| ENSOCUG00000015681 | Rac GTPase activating protein 1(RACGAP1)                        | -1,67 |
| ENSOCUG00000014083 | leucine zipper tumor suppressor 1(LZTS1)                        | -1,67 |
| ENSOCUG00000009017 | osteoglycin(OGN)                                                | -1,66 |

|                    |                                                                     |       |
|--------------------|---------------------------------------------------------------------|-------|
| ENSOCUG00000023919 | transgelin(LOC100009332)                                            | -1,64 |
| ENSOCUG00000001035 | ADAM metallopeptidase with thrombospondin type 1 motif 2(ADAMTS2)   | -1,64 |
| ENSOCUG00000022434 | cell division cycle associated 3(CDCA3)                             | -1,63 |
| ENSOCUG00000009143 | cyclin E1(CCNE1)                                                    | -1,63 |
| ENSOCUG00000001863 | vesicle amine transport 1 like(VAT1L)                               | -1,63 |
| ENSOCUG00000010827 | BOC cell adhesion associated, oncogene regulated(BOC)               | -1,63 |
| ENSOCUG00000010708 | kinesin family member C1(KIFC1)                                     | -1,63 |
| ENSOCUG00000014801 | acyl-CoA desaturase(LOC100346561)                                   | -1,63 |
| ENSOCUG00000024282 | pleckstrin homology domain containing B2(PLEKHB2)                   | -1,62 |
| ENSOCUG00000001389 | leucine rich repeat and Ig domain containing 4(LINGO4)              | -1,62 |
| ENSOCUG00000022014 | notch 3(NOTCH3)                                                     | -1,61 |
| ENSOCUG00000006357 | ADAM metallopeptidase with thrombospondin type 1 motif 12(ADAMTS12) | -1,61 |
| ENSOCUG00000023213 | pro-neuregulin-4, membrane-bound isoform-like(LOC108176558)         | -1,61 |
| ENSOCUG00000008491 | testin LIM domain protein(TES)                                      | -1,60 |
| ENSOCUG00000010232 | anthrax toxin receptor 1(ANTXR1)                                    | -1,60 |
| ENSOCUG00000021663 | CUGBP, Elav-like family member 6(CELF6)                             | -1,60 |
| ENSOCUG00000017377 | matrilin 2(MATN2)                                                   | -1,60 |
| ENSOCUG00000008818 | creatine kinase B(CKB)                                              | -1,60 |
| ENSOCUG00000021411 | tsukushi, small leucine rich proteoglycan(TSKU)                     | -1,60 |
| ENSOCUG00000001801 | forkhead box P2(FOXP2)                                              | -1,59 |
| ENSOCUG00000006490 | leucine-rich repeat-containing protein 37A2(LOC103346478)           | -1,58 |
| ENSOCUG00000015020 | collagen type V alpha 2 chain(COL5A2)                               | -1,57 |
| ENSOCUG00000004137 | protease, serine 23(PRSS23)                                         | -1,55 |
| ENSOCUG00000013868 | MMS22 like, DNA repair protein(MMS22L)                              | -1,55 |
| ENSOCUG00000002424 | serum amyloid A-3(SAA3)                                             | -1,54 |
| ENSOCUG00000015443 | adenylate cyclase 3(ADCY3)                                          | -1,54 |
| ENSOCUG00000023778 | CD300a molecule(CD300A)                                             | -1,53 |
| ENSOCUG00000017136 | solute carrier family 27 member 6(SLC27A6)                          | -1,53 |
| ENSOCUG00000016347 | phosphoethanolamine/phosphocholine phosphatase(PHOSPHO1)            | -1,53 |
| ENSOCUG00000001921 | KIAA0825 ortholog(KIAA0825)                                         | -1,52 |
| ENSOCUG00000024273 | sulfatase 2(SULF2)                                                  | -1,52 |
| ENSOCUG00000027359 | tetraspanin 11(TSPAN11)                                             | -1,52 |
| ENSOCUG00000013478 | HtrA serine peptidase 1(HTRA1)                                      | -1,51 |
| ENSOCUG00000003866 | fibrillin 1(FBN1)                                                   | -1,51 |
| ENSOCUG00000017019 | cadherin 11(CDH11)                                                  | -1,51 |
| ENSOCUG00000008498 | uridine phosphorylase 2(UPP2)                                       | -1,49 |
| ENSOCUG00000008841 | glutamate-ammonia ligase(GLUL)                                      | -1,49 |
| ENSOCUG00000027031 | zinc finger protein 496(ZNF496)                                     | -1,49 |
| ENSOCUG00000015371 | serine peptidase inhibitor, Kunitz type 1(SPINT1)                   | -1,49 |
| ENSOCUG00000009543 | potassium calcium-activated channel subfamily M alpha 1(KCNMA1)     | -1,48 |
| ENSOCUG00000010299 | cysteine and glycine rich protein 1(CSRP1)                          | -1,48 |
| ENSOCUG00000015039 | fibronectin type III domain containing 1(FNDC1)                     | -1,47 |
| ENSOCUG00000015853 | glutaredoxin(GLRX)                                                  | -1,46 |
| ENSOCUG00000012866 | TEF, PAR bZIP transcription factor(TEF)                             | -1,45 |
| ENSOCUG00000003663 | actin, gamma 2, smooth muscle, enteric(ACTG2)                       | -1,44 |
| ENSOCUG00000008855 | cerebral endothelial cell adhesion molecule(CERCAM)                 | -1,44 |
| ENSOCUG00000008012 | stathmin(LOC100358241)                                              | -1,43 |
| ENSOCUG00000008476 | polo like kinase 1(PLK1)                                            | -1,42 |

|                    |                                                                         |       |
|--------------------|-------------------------------------------------------------------------|-------|
| ENSOCUG00000024939 | interferon induced protein with tetratricopeptide repeats 2(IFIT2)      | -1,42 |
| ENSOCUG00000022047 | MPV17 mitochondrial inner membrane protein like(MPV17L)                 | -1,42 |
| ENSOCUG00000017494 | mannose receptor C type 2(MRC2)                                         | -1,42 |
| ENSOCUG00000026406 | butyrophilin subfamily 1 member A1-like(LOC108175832)                   | -1,41 |
| ENSOCUG00000027184 | carbonyl reductase 1(CBR1)                                              | -1,41 |
| ENSOCUG00000016815 | islet cell autoantigen 1(ICA1)                                          | -1,40 |
| ENSOCUG00000007759 | ubiquitin specific peptidase 2(USP2)                                    | -1,39 |
| ENSOCUG00000005896 | inositol polyphosphate-4-phosphatase type II B(INPP4B)                  | -1,39 |
| ENSOCUG00000005317 | calcium release activated channel regulator 2A(CRACR2A)                 | -1,39 |
| ENSOCUG00000001912 | plexin B1(PLXNB1)                                                       | -1,38 |
| ENSOCUG00000011626 | calcium/calmodulin dependent protein kinase ID(CAMK1D)                  | -1,38 |
| ENSOCUG00000004590 | collagen type XXVII alpha 1 chain(COL27A1)                              | -1,37 |
| ENSOCUG00000003858 | glycine N-methyltransferase(GNMT)                                       | -1,36 |
| ENSOCUG00000026099 | peripheral myelin protein 22(PMP22)                                     | -1,36 |
| ENSOCUG00000000637 | myosin light chain 9(MYL9)                                              | -1,35 |
| ENSOCUG00000011126 | heparanase(HPSE)                                                        | -1,35 |
| ENSOCUG00000008478 | syntaxin binding protein 4(STXBP4)                                      | -1,35 |
| ENSOCUG00000005900 | fibulin 2(FBLN2)                                                        | -1,35 |
| ENSOCUG00000006917 | ER membrane associated RNA degradation(ERMARD)                          | -1,35 |
| ENSOCUG00000004505 | coiled-coil domain containing 77(CCDC77)                                | -1,34 |
| ENSOCUG00000014596 | lysyl oxidase like 2(LOXL2)                                             | -1,34 |
| ENSOCUG00000016538 | minichromosome maintenance complex component 6(MCM6)                    | -1,33 |
| ENSOCUG00000012971 | GLIS family zinc finger 2(GLIS2)                                        | -1,33 |
| ENSOCUG00000010637 | minichromosome maintenance complex component 5(MCM5)                    | -1,33 |
| ENSOCUG00000026731 | helicase, lymphoid-specific(HELLS)                                      | -1,33 |
| ENSOCUG00000015372 | DEAQ-box RNA dependent ATPase 1(DQX1)                                   | -1,33 |
| ENSOCUG00000004841 | dickkopf WNT signaling pathway inhibitor 3(DKK3)                        | -1,33 |
| ENSOCUG00000002376 | HAUS augmin like complex subunit 7(HAUS7)                               | -1,33 |
| ENSOCUG00000026480 | aldehyde oxidase 2(AOX2)                                                | -1,32 |
| ENSOCUG00000015509 | non-SMC condensin II complex subunit G2(NCAPG2)                         | -1,32 |
| ENSOCUG00000010244 | matrix metalloproteinase 14(MMP14)                                      | -1,31 |
| ENSOCUG00000013696 | BicC family RNA binding protein 1(BICC1)                                | -1,31 |
| ENSOCUG00000015924 | minichromosome maintenance complex component 2(MCM2)                    | -1,30 |
| ENSOCUG00000016164 | cytochrome P450 1B1(LOC100358590)                                       | -1,30 |
| ENSOCUG00000005032 | family with sequence similarity 169 member B(FAM169B)                   | -1,29 |
| ENSOCUG00000006350 | solute carrier family 12 member 4(SLC12A4)                              | -1,29 |
| ENSOCUG00000007526 | cystathionine gamma-lyase(CTH)                                          | -1,28 |
| ENSOCUG00000000560 | hes related family bHLH transcription factor with YRPW motif-like(HEYL) | -1,27 |
| ENSOCUG00000003212 | tumor suppressor candidate 3(TUSC3)                                     | -1,27 |
| ENSOCUG00000006493 | stathmin 1(STMN1)                                                       | -1,27 |
| ENSOCUG00000006927 | Rho GTPase activating protein 42(ARHGAP42)                              | -1,26 |
| ENSOCUG00000014326 | prostaglandin-E(2) 9-reductase-like(LOC100352716)                       | -1,26 |
| ENSOCUG00000007967 | four and a half LIM domains 2(FHL2)                                     | -1,26 |
| ENSOCUG00000024509 | butyrophilin subfamily 1 member A1(LOC100343656)                        | -1,26 |
| ENSOCUG00000016717 | INTS3 and NABP interacting protein(INIP)                                | -1,24 |
| ENSOCUG00000014029 | SET domain containing 4(SETD4)                                          | -1,24 |
| ENSOCUG00000013643 | PDZ and LIM domain 1(PDLIM1)                                            | -1,24 |
| ENSOCUG00000003091 | adenylate cyclase 7(ADCY7)                                              | -1,23 |

|                    |                                                                             |       |
|--------------------|-----------------------------------------------------------------------------|-------|
| ENSOCUG00000015051 | protein phosphatase 1 regulatory subunit 3C(PPP1R3C)                        | -1,21 |
| ENSOCUG00000005474 | sarcoglycan beta(SGCB)                                                      | -1,21 |
| ENSOCUG00000001673 | triokinase and FMN cyclase(TKFC)                                            | -1,21 |
| ENSOCUG00000006969 | decorin(DCN)                                                                | -1,21 |
| ENSOCUG00000009260 | phospholipase C eta 1(PLCH1)                                                | -1,21 |
| ENSOCUG00000002336 | bone marrow stromal cell antigen 1(BST1)                                    | -1,21 |
| ENSOCUG00000013609 | lipopolysaccharide binding protein(LBP)                                     | -1,20 |
| ENSOCUG00000014498 | solute carrier family 16 member 12(SLC16A12)                                | -1,19 |
| ENSOCUG00000015234 | collagen type XIV alpha 1 chain(COL14A1)                                    | -1,17 |
| ENSOCUG00000000324 | proline-serine-threonine phosphatase interacting protein 2(PSTPIP2)         | 1,39  |
| ENSOCUG00000006009 | acyl-coenzyme A thioesterase 1(LOC100344509)                                | 1,43  |
| ENSOCUG00000029130 | cytochrome P450 2C1(CYP2C1)                                                 | 1,46  |
| ENSOCUG00000007555 | peptidoglycan recognition protein 2(PGLYRP2)                                | 1,46  |
| ENSOCUG00000007699 | kynurenine 3-monooxygenase(KMO)                                             | 1,47  |
| ENSOCUG00000022168 | serine dehydratase(SDS)                                                     | 1,51  |
| ENSOCUG00000015313 | cytochrome c oxidase protein 20 homolog(LOC100349428)                       | 1,52  |
| ENSOCUG00000014197 | macrophage scavenger receptor 1(MSR1)                                       | 1,55  |
| ENSOCUG00000016959 | absent in melanoma 1-like(AIM1L)                                            | 1,56  |
| ENSOCUG00000003246 | sulfatase 1(SULF1)                                                          | 1,58  |
| ENSOCUG00000026526 | protein phosphatase, Mg <sup>2+</sup> /Mn <sup>2+</sup> dependent 1E(PPM1E) | 1,59  |
| ENSOCUG00000007130 | solute carrier family 25 member 25(SLC25A25)                                | 1,60  |
| ENSOCUG00000009725 | acyl-CoA wax alcohol acyltransferase 1(AWAT1)                               | 1,61  |
| ENSOCUG00000027233 | uncharacterized LOC100346308(LOC100346308)                                  | 1,64  |
| ENSOCUG00000006937 | coiled-coil domain containing 57(CCDC57)                                    | 1,67  |
| ENSOCUG00000004163 | solute carrier family 25 member 33(SLC25A33)                                | 1,67  |
| ENSOCUG00000011634 | sphingomyelin phosphodiesterase 3(SMPD3)                                    | 1,70  |
| ENSOCUG00000001028 | major facilitator superfamily domain containing 2A(MFSD2A)                  | 1,75  |
| ENSOCUG00000016068 | serpin family E member 1(SERPINE1)                                          | 1,75  |
| ENSOCUG00000001185 | G protein-coupled receptor 149(GPR149)                                      | 1,81  |
| ENSOCUG00000024272 | nexilin F-actin binding protein(NEXN)                                       | 1,82  |
| ENSOCUG00000011201 | CYP4B1-like isozyme short form(CYP4B1)                                      | 1,84  |
| ENSOCUG00000007999 | dual specificity phosphatase 1(DUSP1)                                       | 1,84  |
| ENSOCUG00000021506 | Fos proto-oncogene, AP-1 transcription factor subunit(FOS)                  | 1,87  |
| ENSOCUG00000024078 | protein GREB1(LOC100345224)                                                 | 1,89  |
| ENSOCUG00000025236 | leukocyte protein(LOC100009166)                                             | 1,91  |
| ENSOCUG00000024474 | L-gulonolactone oxidase(LOC100341843)                                       | 1,91  |
| ENSOCUG00000002702 | radical S-adenosyl methionine domain containing 1(RSAD1)                    | 1,92  |
| ENSOCUG00000023743 | heat shock 70 kDa protein 1B(LOC100354435)                                  | 1,92  |
| ENSOCUG00000002000 | sarcoglycan delta(SGCD)                                                     | 1,93  |
| ENSOCUG00000004662 | Tctex1 domain containing 1(TCTEX1D1)                                        | 2,02  |
| ENSOCUG00000014749 | ATP/GTP binding protein like 3(AGBL3)                                       | 2,06  |
| ENSOCUG00000017424 | activating transcription factor 3(ATF3)                                     | 2,09  |
| ENSOCUG00000005465 | nocturnin(NOCT)                                                             | 2,10  |
| ENSOCUG00000013296 | growth arrest and DNA damage inducible gamma(GADD45G)                       | 2,12  |
| ENSOCUG00000029339 | acyl-CoA wax alcohol acyltransferase 2(AWAT2)                               | 2,12  |
| ENSOCUG00000004099 | ganglioside induced differentiation associated protein 1 like 1(GDAP1L1)    | 2,15  |
| ENSOCUG00000004492 | potassium voltage-gated channel subfamily Q member 1(KCNQ1)                 | 2,18  |
| ENSOCUG00000009863 | protein kinase C theta(PRKCQ)                                               | 2,21  |

|                    |                                                                         |         |
|--------------------|-------------------------------------------------------------------------|---------|
| ENSOCUG00000002656 | trafficking protein particle complex 3 like(TRAPPC3L)                   | 2,26    |
| ENSOCUG00000004269 | transient receptor potential cation channel subfamily V member 4(TRPV4) | 2,26    |
| ENSOCUG00000006499 | mitochondria localized glutamic acid rich protein(MGARP)                | 2,29    |
| ENSOCUG00000012452 | adhesion G protein-coupled receptor F3(ADGRF3)                          | 2,32    |
| ENSOCUG00000012831 | insulin like growth factor binding protein 1(IGFBP1)                    | 2,39    |
| ENSOCUG00000008253 | tissue factor pathway inhibitor(TFPI)                                   | 2,46    |
| ENSOCUG00000025112 | heat shock 70 kDa protein 1B(LOC100354037)                              | 2,48    |
| ENSOCUG00000002457 | canopy FGF signaling regulator 1(CNPY1)                                 | 2,49    |
| ENSOCUG00000015664 | tryptophan hydroxylase 2(TPH2)                                          | 2,57    |
| ENSOCUG00000005480 | TATA-box binding protein associated factor 4b(TAF4B)                    | 2,68    |
| ENSOCUG00000023871 | uncharacterized LOC100347087(LOC100347087)                              | 2,78    |
| ENSOCUG00000017102 | serpin family A member 7(SERPINA7)                                      | 2,81    |
| ENSOCUG00000023547 | tubulin alpha-3 chain(LOC100350967)                                     | 2,85    |
| ENSOCUG00000007038 | urotensin 2B(UTS2B)                                                     | 2,92    |
| ENSOCUG00000000784 | nuclear receptor subfamily 4 group A member 2(NR4A2)                    | 2,99    |
| ENSOCUG00000027771 | zymogen granule membrane protein 16-like(LOC100359023)                  | 3,02    |
| ENSOCUG00000023796 | lactotransferrin(LTF)                                                   | 3,03    |
| ENSOCUG00000006597 | calmegin(CLGN)                                                          | 3,14    |
| ENSOCUG00000008182 | coiled-coil domain containing 136(CCDC136)                              | 3,24    |
| ENSOCUG00000012939 | ectonucleotide pyrophosphatase/phosphodiesterase 5 (putative)(ENPP5)    | 3,27    |
| ENSOCUG00000002174 | testis expressed 12(TEX12)                                              | 3,39    |
| ENSOCUG00000029634 | arachidonate lipoxygenase 3(ALOXE3)                                     | 3,77    |
| ENSOCUG00000022232 | zymogen granule membrane protein 16(LOC100345057)                       | 4,89    |
| ENSOCUG00000027212 | zymogen granule membrane protein 16-like(LOC100339377)                  | 6,91    |
| ENSOCUG00000017680 | family with sequence similarity 212 member B(FAM212B)                   | < -0,01 |
| ENSOCUG00000008748 | 5'-nucleotidase domain containing 4(NT5DC4)                             | < -0,01 |
| ENSOCUG00000010366 | transmembrane protease, serine 13(TMPPRSS13)                            | < -0,01 |
| ENSOCUG00000016046 | potassium voltage-gated channel subfamily A member 6(KCNA6)             | < -0,01 |
| ENSOCUG00000001255 | RRAD and GEM like GTPase 2(REM2)                                        | < -0,02 |
| ENSOCUG00000002319 | PCNA-associated factor-like(LOC100356881)                               | < -0,02 |
| ENSOCUG00000008557 | adenylate cyclase 2(ADCY2)                                              | < -0,02 |
| ENSOCUG00000002283 | family with sequence similarity 84 member A(FAM84A)                     | < -0,03 |
| ENSOCUG00000003999 | calcium/calmodulin dependent protein kinase IG(CAMK1G)                  | < -0,03 |
| ENSOCUG00000005596 | gremlin 1, DAN family BMP antagonist(GREM1)                             | < -0,03 |
| ENSOCUG00000010335 | DS cell adhesion molecule like 1(DSCAML1)                               | < -0,03 |
| ENSOCUG00000015215 | homeobox A1(HOXA1)                                                      | < -0,03 |
| ENSOCUG00000016650 | DEP domain containing 1B(DEPDC1B)                                       | < -0,03 |
| ENSOCUG00000001041 | maternal embryonic leucine zipper kinase(MELK)                          | < -0,04 |
| ENSOCUG00000006091 | odd-skipped related transcription factor 1(OSR1)                        | < -0,04 |
| ENSOCUG00000006437 | RUN domain containing 3A(RUNDC3A)                                       | < -0,04 |
| ENSOCUG00000007225 | cellular retinoic acid binding protein 2(CRABP2)                        | < -0,04 |
| ENSOCUG00000002624 | Nik related kinase(NRK)                                                 | < -0,05 |
| ENSOCUG00000006383 | ghrelin and obestatin prepropeptide(GHRL)                               | < -0,05 |
| ENSOCUG00000006801 | minichromosome maintenance 10 replication initiation factor(MCM10)      | < -0,05 |
| ENSOCUG00000004047 | spindle and kinetochore associated complex subunit 3(SKA3)              | < -0,07 |
| ENSOCUG00000006341 | calbindin 1(CALB1)                                                      | < -0,07 |
| ENSOCUG00000007263 | cell surface glycoprotein CD200 receptor 2(LOC100348666)                | < -0,08 |
| ENSOCUG00000014335 | tripartite motif family like 1(TRIML1)                                  | < -0,08 |

|                     |                                                                           |         |
|---------------------|---------------------------------------------------------------------------|---------|
| ENSOCUG00000014421  | myelin protein zero(MPZ)                                                  | < -0,09 |
| ENSOCUG00000002956  | copine 4(CPNE4)                                                           | < -0,10 |
| ENSOCUG00000007994  | HECT, C2 and WW domain containing E3 ubiquitin protein ligase 1(HECW1)    | < -0,11 |
| ENSOCUG00000008418  | beta-1,4-N-acetyl-galactosaminyltransferase 3(B4GALNT3)                   | < -0,11 |
| ENSOCUG00000013934  | coiled-coil domain containing 189(CCDC189)                                | < -0,11 |
| ENSOCUG00000012527  | solute carrier family 26 member 7(SLC26A7)                                | < -0,12 |
| ENSOCUG00000014857  | collagen type V alpha 3 chain(COL5A3)                                     | < -0,12 |
| ENSOCUG00000000266  | Wnt family member 2B(WNT2B)                                               | < -0,13 |
| ENSOCUG00000001961  | RAD51 associated protein 1(RAD51AP1)                                      | < -0,13 |
| ENSOCUG00000008531  | hydroxysteroid 17-beta dehydrogenase 3(HSD17B3)                           | < -0,13 |
| ENSOCUG00000009528  | intestinal-type alkaline phosphatase-like(LOC100352107)                   | < -0,13 |
| ENSOCUG000000027644 | translocator protein 2(TSPO2)                                             | < -0,13 |
| ENSOCUG00000017309  | 5-hydroxytryptamine receptor 4(HTR4)                                      | < -0,15 |
| ENSOCUG00000010677  | insulin receptor related receptor(INSRR)                                  | < -0,16 |
| ENSOCUG00000011298  | family with sequence similarity 83 member D(FAM83D)                       | < -0,16 |
| ENSOCUG00000004089  | matrix metalloproteinase 28(MMP28)                                        | < -0,17 |
| ENSOCUG00000016277  | epiregulin(EREG)                                                          | < -0,19 |
| ENSOCUG00000007146  | 1-aminocyclopropane-1-carboxylate synthase homolog (inactive) like(ACCSL) | < -0,22 |
| ENSOCUG000000029599 | killer cell lectin like receptor B1(KLRB1)                                | < -0,24 |
| ENSOCUG00000006792  | non-SMC condensin I complex subunit G(NCAPG)                              | < -0,32 |
| ENSOCUG00000016390  | WNT1 inducible signaling pathway protein 1(WISP1)                         | < -0,40 |
| ENSOCUG000000029014 | chromosome 13 open reading frame, human C1orf105(C13H1orf105)             | < -0,41 |
| ENSOCUG00000003120  | opioid receptor kappa 1(OPRK1)                                            | < -0,47 |
| ENSOCUG00000014832  | STEAP2 metalloproteinase(STEAP2)                                          | < -0,56 |
| ENSOCUG000000026203 | complement C1q like 1(C1QL1)                                              | < -1,17 |
| ENSOCUG00000002462  | solute carrier family 24 member 2(SLC24A2)                                | < -2,13 |
| ENSOCUG000000026293 | leucine rich repeats and transmembrane domains 1(LRTM1)                   | < -3,82 |
| ENSOCUG00000000087  | TLC domain containing 2(TLCD2)                                            | > 0,02  |
| ENSOCUG00000010077  | potassium channel tetramerization domain containing 19(KCTD19)            | > 0,02  |
| ENSOCUG00000007327  | contactin associated protein 1(CNTNAP1)                                   | > 0,03  |
| ENSOCUG00000009777  | GRB2 associated regulator of MAPK1 subtype 2(GAREM2)                      | > 0,03  |
| ENSOCUG00000016833  | chromosome 13 open reading frame, human C1orf228(C13H1orf228)             | > 0,03  |
| ENSOCUG000000022998 | tubulin alpha-3 chain(LOC100349209)                                       | > 0,03  |
| ENSOCUG00000004632  | carbonic anhydrase 12(CA12)                                               | > 0,04  |
| ENSOCUG00000006025  | proopiomelanocortin(POMC)                                                 | > 0,04  |
| ENSOCUG00000013544  | ATPase H+ transporting V0 subunit a4(ATP6V0A4)                            | > 0,04  |
| ENSOCUG00000003926  | transmembrane protein 89(TMEM89)                                          | > 0,05  |
| ENSOCUG00000004187  | paired box 8(PAX8)                                                        | > 0,05  |
| ENSOCUG00000007102  | tubulin polymerization promoting protein family member 2(TPPP2)           | > 0,05  |
| ENSOCUG00000009532  | AF4/FMR2 family member 3(AFF3)                                            | > 0,05  |
| ENSOCUG00000011656  | actin like 7A(ACTL7A)                                                     | > 0,05  |
| ENSOCUG000000024091 | solute carrier family 22 member 8(SLC22A8)                                | > 0,05  |
| ENSOCUG00000003274  | Opa interacting protein 5(OIP5)                                           | > 0,06  |
| ENSOCUG00000015293  | porcupine homolog (Drosophila)(PORCN)                                     | > 0,06  |
| ENSOCUG00000016063  | CKLF like MARVEL transmembrane domain containing 2(CMTM2)                 | > 0,06  |
| ENSOCUG00000029056  | C-type lectin domain family 17 member A(CLEC17A)                          | > 0,06  |
| ENSOCUG00000000197  | hexokinase 2(HK2)                                                         | > 0,07  |
| ENSOCUG00000001207  | estrogen related receptor beta(ESRRB)                                     | > 0,07  |

|                     |                                                                              |        |
|---------------------|------------------------------------------------------------------------------|--------|
| ENSOCUG00000022774  | cation channel sperm associated auxiliary subunit gamma(CATSPERG)            | > 0,07 |
| ENSOCUG00000001822  | kinesin family member 17(KIF17)                                              | > 0,08 |
| ENSOCUG000000010922 | glyceraldehyde-3-phosphate dehydrogenase, spermatogenic(GAPDHS)              | > 0,08 |
| ENSOCUG000000013226 | BLK proto-oncogene, Src family tyrosine kinase(BLK)                          | > 0,08 |
| ENSOCUG000000005547 | chromosome 19 open reading frame, human C17orf74(C19H17orf74)                | > 0,09 |
| ENSOCUG000000013299 | heat shock protein family B (small) member 9(HSPB9)                          | > 0,09 |
| ENSOCUG000000016389 | solute carrier family 17 member 6(SLC17A6)                                   | > 0,10 |
| ENSOCUG000000016652 | RIB43A domain with coiled-coils 2(RIBC2)                                     | > 0,10 |
| ENSOCUG000000023766 | disintegrin and metalloproteinase domain-containing protein 18(LOC100358989) | > 0,10 |
| ENSOCUG000000005270 | phosphoglycerate kinase 2(PGK2)                                              | > 0,11 |
| ENSOCUG000000027853 | phosphoglycerate mutase 2(PGAM2)                                             | > 0,11 |
| ENSOCUG000000029412 | zymogen granule membrane protein 16-like(LOC100352055)                       | > 0,11 |
| ENSOCUG000000008107 | maestro heat like repeat family member 7(MROH7)                              | > 0,12 |
| ENSOCUG000000015787 | beaded filament structural protein 1(BFSP1)                                  | > 0,12 |
| ENSOCUG000000010163 | acyl-CoA synthetase bubblegum family member 2(ACSBG2)                        | > 0,13 |
| ENSOCUG000000022427 | myomegalin(LOC103350070)                                                     | > 0,14 |
| ENSOCUG000000003737 | acrosin binding protein(ACRBP)                                               | > 0,15 |
| ENSOCUG000000027844 | solute carrier family 24 member 1(SLC24A1)                                   | > 0,16 |
| ENSOCUG000000000119 | solute carrier family 51 alpha subunit(SLC51A)                               | > 0,17 |
| ENSOCUG000000021920 | neuraminidase 4(NEU4)                                                        | > 0,18 |
| ENSOCUG000000017222 | outer dense fiber of sperm tails 1(ODF1)                                     | > 0,19 |
| ENSOCUG000000015667 | SH3 domain containing ring finger 2(SH3RF2)                                  | > 0,20 |
| ENSOCUG000000004280 | chromosome 4 open reading frame, human C12orf50(C4H12orf50)                  | > 0,24 |
| ENSOCUG000000022253 | putative spermatogenesis-associated protein 31D3(LOC100341232)               | > 0,24 |
| ENSOCUG000000005090 | spermatogenic leucine zipper 1(SPZ1)                                         | > 0,26 |
| ENSOCUG000000029604 | calcium binding protein, spermatid associated 1(CABS1)                       | > 0,26 |
| ENSOCUG000000027755 | putative spermatogenesis-associated protein 31D3(LOC100355671)               | > 0,29 |
| ENSOCUG000000017123 | cilia and flagella associated protein 53(CFAP53)                             | > 0,30 |
| ENSOCUG000000006562 | LanC like 3(LANCL3)                                                          | > 0,32 |
| ENSOCUG000000001385 | ornithine decarboxylase antizyme 3(OAZ3)                                     | > 0,35 |
| ENSOCUG000000010340 | arachidonate 15-lipoxygenase, type B(ALOX15B)                                | > 0,41 |
| ENSOCUG000000015803 | tubulointerstitial nephritis antigen(TINAG)                                  | > 0,45 |
| ENSOCUG000000012837 | germ cell associated 1(GSG1)                                                 | > 0,46 |
| ENSOCUG000000021104 | transition protein 2(TNP2)                                                   | > 0,47 |
| ENSOCUG000000005537 | radial spoke head 9 homolog(RSPH9)                                           | > 0,52 |
| ENSOCUG000000015841 | solute carrier family 36 member 3(SLC36A3)                                   | > 0,72 |
| ENSOCUG000000026150 | CD19 molecule(CD19)                                                          | > 1,04 |
| ENSOCUG000000025309 | glycerol kinase 2(GK2)                                                       | > 1,60 |
| ENSOCUG000000026777 | zymogen granule membrane protein 16(LOC100346433)                            | > 104, |
| ENSOCUG000000029690 | zymogen granule membrane protein 16(LOC100350057)                            | > 15,6 |
| ENSOCUG000000027492 | zymogen granule membrane protein 16(LOC100346271)                            | > 18,8 |
| ENSOCUG000000025809 | reticulon 4 receptor-like 2(RTN4RL2)                                         | > 2,37 |
| ENSOCUG000000025107 | membrane associated ring-CH-type finger 4(MARCH4)                            | > 4,13 |
| ENSOCUG000000026477 | tubulin alpha-3 chain(LOC100350027)                                          | > 7,13 |

**Supplementary Table S5.** Functional analysis of differential expressed transcripts in liver tissue between animals born from vitrified-transferred embryos and those conceived naturally.

| Category* | Term                                                                    | Count | p-value |
|-----------|-------------------------------------------------------------------------|-------|---------|
| BP        | collagen fibril organization                                            | 9     | 0,000   |
| BP        | mitotic cytokinesis                                                     | 7     | 0,000   |
| BP        | extracellular fibril organization                                       | 4     | 0,000   |
| BP        | negative regulation of growth                                           | 4     | 0,004   |
| BP        | elastic fiber assembly                                                  | 3     | 0,007   |
| BP        | DNA replication initiation                                              | 4     | 0,007   |
| BP        | regulation of cytoskeleton organization                                 | 3     | 0,011   |
| BP        | cellular response to zinc ion                                           | 3     | 0,022   |
| BP        | DNA unwinding involved in DNA replication                               | 3     | 0,022   |
| BP        | glomerular filtration                                                   | 3     | 0,022   |
| BP        | protein localization to kinetochore                                     | 3     | 0,022   |
| BP        | microtubule-based movement                                              | 6     | 0,023   |
| BP        | fatty acid biosynthetic process                                         | 4     | 0,027   |
| BP        | cell adhesion                                                           | 9     | 0,028   |
| BP        | response to hormone                                                     | 3     | 0,029   |
| BP        | positive regulation of vascular endothelial growth factor production    | 4     | 0,031   |
| BP        | glycolytic process                                                      | 4     | 0,035   |
| BP        | positive regulation of macrophage derived foam cell differentiation     | 3     | 0,037   |
| BP        | cellular response to amino acid stimulus                                | 5     | 0,042   |
| BP        | arachidonic acid metabolic process                                      | 3     | 0,045   |
| BP        | skin development                                                        | 4     | 0,049   |
| BP        | endodermal cell differentiation                                         | 4     | 0,054   |
| BP        | mitotic metaphase plate congression                                     | 4     | 0,060   |
| BP        | positive regulation of branching involved in ureteric bud morphogenesis | 3     | 0,063   |
| BP        | heparan sulfate proteoglycan metabolic process                          | 2     | 0,068   |
| BP        | glial cell-derived neurotrophic factor receptor signaling pathway       | 2     | 0,068   |
| BP        | esophagus smooth muscle contraction                                     | 2     | 0,068   |
| BP        | positive regulation of apoptotic process                                | 8     | 0,073   |
| BP        | collagen catabolic process                                              | 3     | 0,073   |
| BP        | artery morphogenesis                                                    | 3     | 0,073   |
| BP        | acute-phase response                                                    | 3     | 0,083   |
| BP        | canonical Wnt signaling pathway                                         | 5     | 0,084   |
| BP        | cell-matrix adhesion                                                    | 5     | 0,084   |
| BP        | endothelial cell migration                                              | 3     | 0,094   |
| CC        | extracellular matrix                                                    | 19    | 0,000   |
| CC        | proteinaceous extracellular matrix                                      | 20    | 0,000   |
| CC        | extracellular space                                                     | 47    | 0,000   |
| CC        | zymogen granule membrane                                                | 7     | 0,000   |
| CC        | collagen trimer                                                         | 7     | 0,000   |
| CC        | extracellular exosome                                                   | 87    | 0,000   |
| CC        | basement membrane                                                       | 7     | 0,002   |
| CC        | MCM complex                                                             | 4     | 0,002   |



|      |                                                                                                                                                               |    |       |
|------|---------------------------------------------------------------------------------------------------------------------------------------------------------------|----|-------|
| CC   | midbody                                                                                                                                                       | 9  | 0,005 |
| CC   | condensed nuclear chromosome outer kinetochore                                                                                                                | 3  | 0,006 |
| CC   | spindle microtubule                                                                                                                                           | 5  | 0,010 |
| CC   | microfibril                                                                                                                                                   | 3  | 0,014 |
| CC   | cell surface                                                                                                                                                  | 17 | 0,014 |
| CC   | microtubule                                                                                                                                                   | 8  | 0,039 |
| CC   | chromocenter                                                                                                                                                  | 3  | 0,046 |
| CC   | cytoplasm                                                                                                                                                     | 75 | 0,050 |
| CC   | fibrillar collagen trimer                                                                                                                                     | 2  | 0,063 |
| CC   | Ndc80 complex                                                                                                                                                 | 2  | 0,063 |
| CC   | elastic fiber                                                                                                                                                 | 2  | 0,063 |
| CC   | collagen type V trimer                                                                                                                                        | 2  | 0,063 |
| CC   | chromatin                                                                                                                                                     | 5  | 0,071 |
| MF   | calcium ion binding                                                                                                                                           | 30 | 0,000 |
| MF   | extracellular matrix structural constituent                                                                                                                   | 6  | 0,001 |
| MF   | metalloendopeptidase activity                                                                                                                                 | 11 | 0,002 |
| MF   | oxidoreductase activity, acting on paired donors, with oxidation of a pair of donors resulting in the reduction of molecular oxygen to two molecules of water | 3  | 0,003 |
| MF   | carbohydrate binding                                                                                                                                          | 8  | 0,005 |
| MF   | scavenger receptor activity                                                                                                                                   | 5  | 0,021 |
| MF   | double-stranded DNA binding                                                                                                                                   | 4  | 0,022 |
| MF   | adenylate cyclase activity                                                                                                                                    | 3  | 0,029 |
| MF   | long-chain fatty acid-CoA ligase activity                                                                                                                     | 3  | 0,043 |
| MF   | structural constituent of muscle                                                                                                                              | 3  | 0,058 |
| MF   | long-chain-alcohol O-fatty-acyltransferase activity                                                                                                           | 2  | 0,060 |
| MF   | microtubule motor activity                                                                                                                                    | 5  | 0,066 |
| MF   | zinc ion binding                                                                                                                                              | 34 | 0,072 |
| MF   | arylsulfatase activity                                                                                                                                        | 2  | 0,089 |
| MF   | N-acetylglucosamine-6-sulfatase activity                                                                                                                      | 2  | 0,089 |
| KEGG | Protein digestion and absorption                                                                                                                              | 12 | 0,000 |
| KEGG | Cell cycle                                                                                                                                                    | 13 | 0,000 |
| KEGG | PPAR signaling pathway                                                                                                                                        | 9  | 0,000 |
| KEGG | Platelet activation                                                                                                                                           | 10 | 0,005 |
| KEGG | Oocyte meiosis                                                                                                                                                | 9  | 0,005 |
| KEGG | Gap junction                                                                                                                                                  | 8  | 0,005 |
| KEGG | Circadian entrainment                                                                                                                                         | 8  | 0,006 |
| KEGG | Starch and sucrose metabolism                                                                                                                                 | 5  | 0,009 |
| KEGG | Estrogen signaling pathway                                                                                                                                    | 8  | 0,009 |
| KEGG | Glycerolipid metabolism                                                                                                                                       | 7  | 0,010 |
| KEGG | p53 signaling pathway                                                                                                                                         | 7  | 0,010 |
| KEGG | Gastric acid secretion                                                                                                                                        | 7  | 0,010 |
| KEGG | Aldosterone synthesis and secretion                                                                                                                           | 7  | 0,012 |
| KEGG | Metabolic pathways                                                                                                                                            | 45 | 0,016 |
| KEGG | Salivary secretion                                                                                                                                            | 7  | 0,019 |
| KEGG | Mineral absorption                                                                                                                                            | 5  | 0,020 |
| KEGG | Progesterone-mediated oocyte maturation                                                                                                                       | 7  | 0,022 |
| KEGG | ECM-receptor interaction                                                                                                                                      | 7  | 0,022 |

|      |                                         |    |       |
|------|-----------------------------------------|----|-------|
| KEGG | Pancreatic secretion                    | 8  | 0,026 |
| KEGG | Melanogenesis                           | 7  | 0,032 |
| KEGG | Bile secretion                          | 6  | 0,032 |
| KEGG | Vascular smooth muscle contraction      | 8  | 0,033 |
| KEGG | Oxytocin signaling pathway              | 9  | 0,034 |
| KEGG | Biosynthesis of unsaturated fatty acids | 4  | 0,045 |
| KEGG | Fatty acid metabolism                   | 5  | 0,051 |
| KEGG | Glutamatergic synapse                   | 7  | 0,052 |
| KEGG | Amoebiasis                              | 7  | 0,056 |
| KEGG | cAMP signaling pathway                  | 10 | 0,058 |
| KEGG | GnRH signaling pathway                  | 6  | 0,059 |
| KEGG | Drug metabolism - other enzymes         | 5  | 0,083 |
| KEGG | Retrograde endocannabinoid signaling    | 6  | 0,087 |
| KEGG | Dilated cardiomyopathy                  | 6  | 0,087 |
| KEGG | Adipocytokine signaling pathway         | 5  | 0,087 |
| KEGG | Thyroid hormone synthesis               | 5  | 0,094 |
| KEGG | Cholinergic synapse                     | 6  | 0,096 |

\*Functional analysis was referred to the GO term annotation according to the biological process (BP), cellular component (CC) and molecular function (MF) classification, and the KEGG pathways in which they are involved.

**Supplementary Table S6.** Differentially expressed transcripts of vitrified-transferred animals compared to those naturally-conceived in F1, which are inherited by the vitrified-transferred progeny in the F2 and F3 generations.

| <b>DETs inherited by F2</b> | <b>DETs inherited by F3</b> |
|-----------------------------|-----------------------------|
| ENSOCUG0000000109           | ENSOCUG0000000092           |
| ENSOCUG0000000197           | ENSOCUG0000000215           |
| ENSOCUG0000000215           | ENSOCUG0000000266           |
| ENSOCUG0000000313           | ENSOCUG0000000580           |
| ENSOCUG0000000580           | ENSOCUG00000001185          |
| ENSOCUG0000000856           | ENSOCUG00000001754          |
| ENSOCUG00000001171          | ENSOCUG00000002462          |
| ENSOCUG00000001375          | ENSOCUG00000002542          |
| ENSOCUG00000001376          | ENSOCUG00000002624          |
| ENSOCUG00000001627          | ENSOCUG00000002702          |
| ENSOCUG00000001652          | ENSOCUG00000002956          |
| ENSOCUG00000001673          | ENSOCUG00000003030          |
| ENSOCUG00000001863          | ENSOCUG00000003091          |
| ENSOCUG00000002000          | ENSOCUG00000003246          |
| ENSOCUG00000002703          | ENSOCUG00000003724          |
| ENSOCUG00000002707          | ENSOCUG00000003858          |
| ENSOCUG00000002814          | ENSOCUG00000004004          |
| ENSOCUG00000002858          | ENSOCUG00000004047          |
| ENSOCUG00000002878          | ENSOCUG00000004275          |
| ENSOCUG00000003203          | ENSOCUG00000004343          |
| ENSOCUG00000003217          | ENSOCUG00000004480          |
| ENSOCUG00000003246          | ENSOCUG00000004632          |
| ENSOCUG00000003467          | ENSOCUG00000005159          |
| ENSOCUG00000003649          | ENSOCUG00000005521          |
| ENSOCUG00000003876          | ENSOCUG00000005830          |
| ENSOCUG00000004393          | ENSOCUG00000005885          |
| ENSOCUG00000004485          | ENSOCUG00000006350          |
| ENSOCUG00000004492          | ENSOCUG00000006597          |
| ENSOCUG00000004632          | ENSOCUG00000007151          |
| ENSOCUG00000005032          | ENSOCUG00000007327          |
| ENSOCUG00000005159          | ENSOCUG00000007759          |
| ENSOCUG00000005465          | ENSOCUG00000008236          |
| ENSOCUG00000005540          | ENSOCUG00000008303          |
| ENSOCUG00000005820          | ENSOCUG00000008329          |
| ENSOCUG00000005900          | ENSOCUG00000008571          |
| ENSOCUG00000006009          | ENSOCUG00000009195          |

|                    |                    |
|--------------------|--------------------|
| ENSOCUG00000006357 | ENSOCUG00000009332 |
| ENSOCUG00000006490 | ENSOCUG00000009528 |
| ENSOCUG00000006801 | ENSOCUG00000009532 |
| ENSOCUG00000006962 | ENSOCUG00000009543 |
| ENSOCUG00000007172 | ENSOCUG00000009725 |
| ENSOCUG00000007516 | ENSOCUG00000009932 |
| ENSOCUG00000007555 | ENSOCUG00000009993 |
| ENSOCUG00000007759 | ENSOCUG00000010144 |
| ENSOCUG00000008179 | ENSOCUG00000010184 |
| ENSOCUG00000008329 | ENSOCUG00000010637 |
| ENSOCUG00000008478 | ENSOCUG00000010814 |
| ENSOCUG00000008841 | ENSOCUG00000010941 |
| ENSOCUG00000009260 | ENSOCUG00000011025 |
| ENSOCUG00000009725 | ENSOCUG00000011195 |
| ENSOCUG00000009880 | ENSOCUG00000011350 |
| ENSOCUG00000009993 | ENSOCUG00000011488 |
| ENSOCUG00000010299 | ENSOCUG00000011956 |
| ENSOCUG00000010708 | ENSOCUG00000012148 |
| ENSOCUG00000010814 | ENSOCUG00000012372 |
| ENSOCUG00000010975 | ENSOCUG00000012902 |
| ENSOCUG00000011025 | ENSOCUG00000012939 |
| ENSOCUG00000011201 | ENSOCUG00000013140 |
| ENSOCUG00000011298 | ENSOCUG00000013226 |
| ENSOCUG00000011340 | ENSOCUG00000013412 |
| ENSOCUG00000011488 | ENSOCUG00000013609 |
| ENSOCUG00000011634 | ENSOCUG00000013757 |
| ENSOCUG00000011656 | ENSOCUG00000013934 |
| ENSOCUG00000012071 | ENSOCUG00000014077 |
| ENSOCUG00000012148 | ENSOCUG00000014204 |
| ENSOCUG00000012452 | ENSOCUG00000014498 |
| ENSOCUG00000012831 | ENSOCUG00000014857 |
| ENSOCUG00000012902 | ENSOCUG00000015111 |
| ENSOCUG00000013074 | ENSOCUG00000015313 |
| ENSOCUG00000013111 | ENSOCUG00000015329 |
| ENSOCUG00000013160 | ENSOCUG00000015483 |
| ENSOCUG00000013414 | ENSOCUG00000015664 |
| ENSOCUG00000013478 | ENSOCUG00000015787 |
| ENSOCUG00000013544 | ENSOCUG00000015803 |
| ENSOCUG00000013643 | ENSOCUG00000015893 |
| ENSOCUG00000014077 | ENSOCUG00000016193 |

|                    |                    |
|--------------------|--------------------|
| ENSOCUG00000014801 | ENSOCUG00000016347 |
| ENSOCUG00000015483 | ENSOCUG00000017347 |
| ENSOCUG00000015664 | ENSOCUG00000017620 |
| ENSOCUG00000015667 | ENSOCUG00000017803 |
| ENSOCUG00000015681 | ENSOCUG00000020947 |
| ENSOCUG00000015803 | ENSOCUG00000021508 |
| ENSOCUG00000015924 | ENSOCUG00000022280 |
| ENSOCUG00000016303 | ENSOCUG00000022308 |
| ENSOCUG00000016347 | ENSOCUG00000022392 |
| ENSOCUG00000016496 | ENSOCUG00000022543 |
| ENSOCUG00000016718 | ENSOCUG00000022883 |
| ENSOCUG00000016815 | ENSOCUG00000023285 |
| ENSOCUG00000016909 | ENSOCUG00000023455 |
| ENSOCUG00000017043 | ENSOCUG00000023547 |
| ENSOCUG00000017102 | ENSOCUG00000023778 |
| ENSOCUG00000017136 | ENSOCUG00000024091 |
| ENSOCUG00000017197 | ENSOCUG00000024196 |
| ENSOCUG00000017516 | ENSOCUG00000024492 |
| ENSOCUG00000017689 | ENSOCUG00000025107 |
| ENSOCUG00000021126 | ENSOCUG00000025241 |
| ENSOCUG00000021209 | ENSOCUG00000025501 |
| ENSOCUG00000021411 | ENSOCUG00000025698 |
| ENSOCUG00000021423 | ENSOCUG00000025809 |
| ENSOCUG00000022047 | ENSOCUG00000025901 |
| ENSOCUG00000022434 | ENSOCUG00000025992 |
| ENSOCUG00000022543 | ENSOCUG00000026203 |
| ENSOCUG00000022659 | ENSOCUG00000026303 |
| ENSOCUG00000023005 | ENSOCUG00000026482 |
| ENSOCUG00000023455 | ENSOCUG00000026551 |
| ENSOCUG00000023796 | ENSOCUG00000027492 |
| ENSOCUG00000024019 | ENSOCUG00000027755 |
| ENSOCUG00000024465 | ENSOCUG00000027771 |
| ENSOCUG00000024506 | ENSOCUG00000027844 |
| ENSOCUG00000024939 | ENSOCUG00000029029 |
| ENSOCUG00000025107 | ENSOCUG00000029066 |
| ENSOCUG00000025132 | ENSOCUG00000029235 |
| ENSOCUG00000025236 | ENSOCUG00000029412 |
| ENSOCUG00000025273 | ENSOCUG00000029465 |
| ENSOCUG00000025494 | ENSOCUG00000029599 |
| ENSOCUG00000025657 | ENSOCUG00000029634 |

|                    |                    |
|--------------------|--------------------|
| ENSOCUG00000025868 | ENSOCUG00000029690 |
| ENSOCUG00000026783 | ENSOCUT00000006764 |
| ENSOCUG00000027184 | ENSOCUT00000012795 |
| ENSOCUG00000027359 | ENSOCUT00000025404 |
| ENSOCUG00000029056 |                    |
| ENSOCUG00000029130 |                    |
| ENSOCUG00000029254 |                    |
| ENSOCUG00000029301 |                    |
| ENSOCUG00000029307 |                    |
| ENSOCUG00000029599 |                    |
| ENSOCUG00000029623 |                    |
| ENSOCUT0000002051  |                    |
| ENSOCUT00000022869 |                    |
| ENSOCUT00000024066 |                    |
| ENSOCUT00000025404 |                    |
| ENSOCUT00000027408 |                    |
| ENSOCUT00000030408 |                    |

---

**Supplementary Table S7.** Functional analysis of differential expressed transcripts inherited by F2 from F1 vitrified-transferred animals, compared to those conceived naturally.

| Category* | Term                                                                                                                                                          | Count | p-value |
|-----------|---------------------------------------------------------------------------------------------------------------------------------------------------------------|-------|---------|
| BP        | fatty acid biosynthetic process                                                                                                                               | 3     | 0,009   |
| BP        | cellular response to DNA damage stimulus                                                                                                                      | 4     | 0,018   |
| BP        | chorionic trophoblast cell differentiation                                                                                                                    | 2     | 0,038   |
| BP        | cell adhesion                                                                                                                                                 | 4     | 0,046   |
| BP        | cellular response to zinc ion                                                                                                                                 | 2     | 0,053   |
| BP        | DNA unwinding involved in DNA replication                                                                                                                     | 2     | 0,053   |
| BP        | cell proliferation                                                                                                                                            | 4     | 0,059   |
| BP        | hematopoietic progenitor cell differentiation                                                                                                                 | 3     | 0,067   |
| BP        | mRNA stabilization                                                                                                                                            | 2     | 0,067   |
| BP        | negative regulation of growth                                                                                                                                 | 2     | 0,074   |
| CC        | extracellular matrix                                                                                                                                          | 4     | 0,020   |
| CC        | perinuclear region of cytoplasm                                                                                                                               | 6     | 0,066   |
| CC        | nuclear chromosome                                                                                                                                            | 2     | 0,073   |
| CC        | proteinaceous extracellular matrix                                                                                                                            | 4     | 0,076   |
| CC        | extracellular exosome                                                                                                                                         | 21    | 0,078   |
| MF        | oxidoreductase activity, acting on paired donors, with oxidation of a pair of donors resulting in the reduction of molecular oxygen to two molecules of water | 3     | 0,000   |
| MF        | zinc ion binding                                                                                                                                              | 12    | 0,045   |
| MF        | iron ion binding                                                                                                                                              | 4     | 0,076   |
| KEGG      | PPAR signaling pathway                                                                                                                                        | 5     | 0,001   |
| KEGG      | Biosynthesis of unsaturated fatty acids                                                                                                                       | 4     | 0,001   |
| KEGG      | Cell cycle                                                                                                                                                    | 5     | 0,005   |
| KEGG      | AMPK signaling pathway                                                                                                                                        | 4     | 0,028   |
| KEGG      | Metabolic pathways                                                                                                                                            | 13    | 0,030   |
| KEGG      | Fatty acid metabolism                                                                                                                                         | 3     | 0,035   |
| KEGG      | p53 signaling pathway                                                                                                                                         | 3     | 0,057   |
| KEGG      | Nitrogen metabolism                                                                                                                                           | 2     | 0,082   |

\*Functional analysis was referred to the GO term annotation according to the biological process (BP), cellular component (CC) and molecular function (MF) classification, and the KEGG pathways in which they are involved.

**Supplementary Table S8.** Functional analysis of differential expressed transcripts inherited by F3 from F1 vitrified-transferred animals, compared to those conceived naturally.

| <b>Category*</b> | <b>Term</b>                        | <b>Count</b> | <b>p-value</b> |
|------------------|------------------------------------|--------------|----------------|
| BP               | acute-phase response               | 2            | 0,087          |
| CC               | extracellular matrix               | 7            | 0,000          |
| CC               | zymogen granule membrane           | 4            | 0,000          |
| CC               | extracellular exosome              | 20           | 0,033          |
| CC               | proteinaceous extracellular matrix | 4            | 0,052          |
| CC               | anchored component of membrane     | 2            | 0,087          |
| MF               | carbohydrate binding               | 4            | 0,008          |
| MF               | glycine binding                    | 2            | 0,053          |
| KEGG             | Circadian entrainment              | 4            | 0,007          |
| KEGG             | Gap junction                       | 3            | 0,059          |
| KEGG             | Salivary secretion                 | 3            | 0,059          |
| KEGG             | Glutamatergic synapse              | 3            | 0,087          |

\*Functional analysis was referred to the GO term annotation according to the biological process (BP), cellular component (CC) and molecular function (MF) classification, and the KEGG pathways in which they are involved.



**Supplementary Table S9.** Differentially expressed transcripts in liver tissue between vitrified- transferred progeny and that naturally-conceived in F2.

| Gene accession     | Gene name                                                                               | Fold Change |
|--------------------|-----------------------------------------------------------------------------------------|-------------|
| ENSOCUG00000012831 | insulin like growth factor binding protein 1(IGFBP1)                                    | -6,59       |
| ENSOCUG00000017905 | phosphoenolpyruvate carboxykinase 1(PCK1)                                               | -5,47       |
| ENSOCUG00000008474 | CD2 molecule(CD2)                                                                       | -5,19       |
| ENSOCUG00000017694 | keratin 23(KRT23)                                                                       | -4,75       |
| ENSOCUG00000029731 | HLA class II histocompatibility antigen, DRB1-4 beta chain(LOC100350168)                | -4,56       |
| ENSOCUG00000001327 | histamine receptor H4(HRH4)                                                             | -4,25       |
| ENSOCUG00000012452 | adhesion G protein-coupled receptor F3(ADGRF3)                                          | -4,00       |
| ENSOCUG00000027242 | uncharacterized LOC100341342(LOC100341342)                                              | -3,92       |
| ENSOCUG00000012097 | Ras and Rab interactor like(RINL)                                                       | -3,90       |
| ENSOCUG00000015664 | tryptophan hydroxylase 2(TPH2)                                                          | -3,68       |
| ENSOCUG00000008210 | C-C motif chemokine receptor 9(CCR9)                                                    | -3,58       |
| ENSOCUG00000004897 | fms related tyrosine kinase 3(FLT3)                                                     | -3,57       |
| ENSOCUG00000015667 | SH3 domain containing ring finger 2(SH3RF2)                                             | -3,54       |
| ENSOCUG00000029056 | C-type lectin domain family 17 member A(CLEC17A)                                        | -3,53       |
| ENSOCUG00000029546 | lipase family member J(LIPJ)                                                            | -3,52       |
| ENSOCUG00000013618 | phosphorylase kinase catalytic subunit gamma 1(PHKG1)                                   | -3,49       |
| ENSOCUG00000012752 | signal regulatory protein beta 2(SIRPB2)                                                | -3,47       |
| ENSOCUG00000026984 | tigger transposable element derived 3(TIGD3)                                            | -3,46       |
| ENSOCUG00000029347 | neural retina leucine zipper(NRL)                                                       | -3,43       |
| ENSOCUG00000013315 | Cbp/p300 interacting transactivator with Glu/Asp rich carboxy-terminal domain 1(CITED1) | -3,37       |
| ENSOCUG00000025132 | 60S ribosomal protein L23a(LOC108177184)                                                | -3,30       |
| ENSOCUG00000007555 | peptidoglycan recognition protein 2(PGLYRP2)                                            | -3,29       |
| ENSOCUG00000008285 | neuronal growth regulator 1(NEGR1)                                                      | -3,24       |
| ENSOCUG00000024754 | G protein subunit alpha transducin 3(GNAT3)                                             | -3,16       |
| ENSOCUG00000006954 | perforin 1(PRF1)                                                                        | -3,12       |
| ENSOCUG00000017113 | ankyrin repeat and SOCS box containing 4(ASB4)                                          | -3,08       |
| ENSOCUG00000026162 | inhibitor of carbonic anhydrase(LOC100345698)                                           | -3,02       |
| ENSOCUG00000003715 | lymphocyte transmembrane adaptor 1(LAX1)                                                | -3,01       |
| ENSOCUG00000008378 | dipeptidyl peptidase like 10(DPP10)                                                     | -2,99       |
| ENSOCUG00000011825 | zinc finger DHHC-type containing 1(ZDHC1)                                               | -2,99       |
| ENSOCUG00000027044 | TNF receptor superfamily member 25(TNFRSF25)                                            | -2,98       |
| ENSOCUG00000011428 | coiled-coil domain containing 30(CCDC30)                                                | -2,95       |
| ENSOCUG00000017102 | serpin family A member 7(SERPINA7)                                                      | -2,94       |
| ENSOCUG00000003403 | high affinity immunoglobulin gamma Fc receptor I(LOC100358696)                          | -2,88       |
| ENSOCUG00000028182 | carbonyl reductase [NADPH] 1(LOC100345459)                                              | -2,85       |
| ENSOCUG00000017136 | solute carrier family 27 member 6(SLC27A6)                                              | -2,84       |
| ENSOCUG00000000580 | cadherin 16(CDH16)                                                                      | -2,83       |
| ENSOCUG00000005855 | aspartoacylase(ASPA)                                                                    | -2,80       |
| ENSOCUG00000008419 | solute carrier family 25 member 30(SLC25A30)                                            | -2,73       |
| ENSOCUG00000029599 | killer cell lectin like receptor B1(KLRB1)                                              | -2,70       |
| ENSOCUG00000005940 | aryl hydrocarbon receptor nuclear translocator like(ARNTL)                              | -2,66       |
| ENSOCUG00000026619 | myosin VIIB(MYO7B)                                                                      | -2,65       |

|                    |                                                                      |       |
|--------------------|----------------------------------------------------------------------|-------|
| ENSOCUG00000021209 | metallothionein-2D(LOC100343557)                                     | -2,61 |
| ENSOCUG00000007196 | chromosome unknown open reading frame, human C1orf127(LOC108176210)  | -2,54 |
| ENSOCUG00000013552 | potassium calcium-activated channel subfamily N member 3(KCNN3)      | -2,54 |
| ENSOCUG00000002000 | sarcoglycan delta(SGCD)                                              | -2,51 |
| ENSOCUG00000024883 | permeability factor 2(LOC100354804)                                  | -2,49 |
| ENSOCUG00000014365 | amyloid P component, serum(APCS)                                     | -2,48 |
| ENSOCUG00000010231 | cholinergic receptor nicotinic epsilon subunit(CHRNE)                | -2,46 |
| ENSOCUG00000012464 | CD6 molecule(CD6)                                                    | -2,43 |
| ENSOCUG00000003246 | sulfatase 1(SULF1)                                                   | -2,36 |
| ENSOCUG00000017821 | GATA binding protein 3(GATA3)                                        | -2,36 |
| ENSOCUG00000016751 | receptor activity modifying protein 1(RAMP1)                         | -2,33 |
| ENSOCUG00000015778 | solute carrier family 25 member 47(SLC25A47)                         | -2,32 |
| ENSOCUG00000025273 | liver carboxylesterase 2(LOC100343300)                               | -2,32 |
| ENSOCUG00000015483 | fatty acid binding protein 4(FABP4)                                  | -2,29 |
| ENSOCUG00000022630 | major intrinsic protein of lens fiber(MIP)                           | -2,28 |
| ENSOCUG00000004936 | neuron navigator 3(NAV3)                                             | -2,27 |
| ENSOCUG00000025663 | carnitine O-palmitoyltransferase 1, liver isoform(LOC100350311)      | -2,26 |
| ENSOCUG00000005985 | clusterin(CLU)                                                       | -2,25 |
| ENSOCUG00000006009 | acyl-coenzyme A thioesterase 1(LOC100344509)                         | -2,20 |
| ENSOCUG00000027980 | 60S ribosomal protein L23a(LOC108176709)                             | -2,19 |
| ENSOCUG00000005819 | tyrosine-protein kinase ZAP-70(LOC100342021)                         | -2,17 |
| ENSOCUG00000025236 | leukocyte protein(LOC100009166)                                      | -2,17 |
| ENSOCUG00000014227 | SEC14 like lipid binding 3(SEC14L3)                                  | -2,15 |
| ENSOCUG00000022646 | S100 calcium binding protein A12(S100A12)                            | -2,12 |
| ENSOCUG00000029573 | carbonyl reductase [NADPH] 1(LOC100344692)                           | -2,10 |
| ENSOCUG00000007434 | peptidoglycan recognition protein 1(PGLYRP1)                         | -2,06 |
| ENSOCUG00000021476 | S-acyl fatty acid synthase thioesterase, medium chain(LOC100349940)  | -2,04 |
| ENSOCUG00000000901 | seizure related 6 homolog like 2(SEZ6L2)                             | -2,04 |
| ENSOCUG00000025590 | linker for activation of T-cells(LAT)                                | -2,04 |
| ENSOCUG00000009725 | acyl-CoA wax alcohol acyltransferase 1(AWAT1)                        | -2,02 |
| ENSOCUG00000004492 | potassium voltage-gated channel subfamily Q member 1(KCNQ1)          | -2,00 |
| ENSOCUG00000029130 | cytochrome P450 2C1(CYP2C1)                                          | -1,95 |
| ENSOCUG00000000313 | ovostatin homolog 2(LOC100348825)                                    | -1,93 |
| ENSOCUG00000021126 | Metallothionein-2A(LOC100343299)                                     | -1,93 |
| ENSOCUG00000004345 | CD79b molecule(CD79B)                                                | -1,92 |
| ENSOCUG00000008793 | FK506 binding protein 1B(FKBP1B)                                     | -1,87 |
| ENSOCUG00000008329 | ADAM metalloproteinase with thrombospondin type 1 motif 19(ADAMTS19) | -1,84 |
| ENSOCUG00000016772 | DNA damage inducible transcript 4(DDIT4)                             | -1,82 |
| ENSOCUG00000024174 | potassium voltage-gated channel subfamily B member 1(KCNB1)          | -1,81 |
| ENSOCUG00000024529 | solute carrier family 7 member 13(LOC100348219)                      | -1,81 |
| ENSOCUG00000004307 | ephrin A1(EFNA1)                                                     | -1,80 |
| ENSOCUG00000015352 | energy homeostasis associated(ENHO)                                  | -1,76 |
| ENSOCUG00000017009 | junction adhesion molecule like(JAML)                                | -1,75 |
| ENSOCUG00000011634 | sphingomyelin phosphodiesterase 3(SMPD3)                             | -1,73 |
| ENSOCUG00000005924 | solute carrier family 2 member 1(SLC2A1)                             | -1,71 |
| ENSOCUG00000011201 | CYP4B1-like isozyme short form(CYP4B1)                               | -1,68 |
| ENSOCUG00000009566 | S100 calcium binding protein A8(S100A8)                              | -1,68 |
| ENSOCUG00000024108 | potassium voltage-gated channel subfamily C member 3(LOC100338015)   | -1,64 |

|                    |                                                                             |       |
|--------------------|-----------------------------------------------------------------------------|-------|
| ENSOCUG00000014352 | glycine amidinotransferase(GATM)                                            | -1,60 |
| ENSOCUG00000005177 | flavin containing monooxygenase 2(FMO2)                                     | 1,64  |
| ENSOCUG00000001594 | solute carrier family 16 member 6(SLC16A6)                                  | 1,64  |
| ENSOCUG00000017033 | transferrin receptor(TFRC)                                                  | 1,65  |
| ENSOCUG00000003477 | protein phosphatase 1 regulatory subunit 3B(PPP1R3B)                        | 1,65  |
| ENSOCUG00000017852 | aquaporin 3 (Gill blood group)(AQP3)                                        | 1,67  |
| ENSOCUG00000002965 | zinc finger protein 652(ZNF652)                                             | 1,67  |
| ENSOCUG00000010715 | tubulin gamma complex associated protein 5(TUBGCP5)                         | 1,68  |
| ENSOCUG00000026333 | period circadian clock 1(PER1)                                              | 1,68  |
| ENSOCUG00000005579 | integrin subunit beta 3(ITGB3)                                              | 1,68  |
| ENSOCUG00000029430 | carbonyl reductase [NADPH] 1(LOC100345202)                                  | 1,68  |
| ENSOCUG00000008551 | 5'-aminolevulinatase synthase 1(ALAS1)                                      | 1,68  |
| ENSOCUG00000015053 | mitogen-activated protein kinase kinase kinase MLT(LOC100351826)            | 1,70  |
| ENSOCUG00000013478 | HtrA serine peptidase 1(HTRA1)                                              | 1,70  |
| ENSOCUG00000017924 | membrane metalloendopeptidase(MME)                                          | 1,71  |
| ENSOCUG00000007955 | TEA domain transcription factor 1(TEAD1)                                    | 1,72  |
| ENSOCUG00000017626 | integrin subunit alpha V(ITGAV)                                             | 1,72  |
| ENSOCUG00000014907 | WNT inhibitory factor 1(WIF1)                                               | 1,73  |
| ENSOCUG00000009279 | ATP binding cassette subfamily A member 1(ABCA1)                            | 1,74  |
| ENSOCUG00000000957 | thyroid hormone responsive(THRSP)                                           | 1,75  |
| ENSOCUG00000011526 | aminoadipate aminotransferase(AADAT)                                        | 1,76  |
| ENSOCUG00000017745 | DNA polymerase epsilon, catalytic subunit(POLE)                             | 1,76  |
| ENSOCUG00000015924 | minichromosome maintenance complex component 2(MCM2)                        | 1,77  |
| ENSOCUG00000002707 | MID1 interacting protein 1(MID1IP1)                                         | 1,77  |
| ENSOCUG00000029364 | inositol hexakisphosphate kinase 3(IP6K3)                                   | 1,77  |
| ENSOCUG00000016303 | sulfotransferase family, cytosolic, 1C, member 2(SULT1C2)                   | 1,78  |
| ENSOCUG00000013643 | PDZ and LIM domain 1(PDLIM1)                                                | 1,81  |
| ENSOCUG00000000030 | solute carrier family 17 member 5(SLC17A5)                                  | 1,81  |
| ENSOCUG00000010299 | cysteine and glycine rich protein 1(CSRP1)                                  | 1,81  |
| ENSOCUG00000005032 | family with sequence similarity 169 member B(FAM169B)                       | 1,81  |
| ENSOCUG00000027187 | proteoglycan 4(PRG4)                                                        | 1,83  |
| ENSOCUG00000003696 | pecanex homolog 1 (Drosophila)(PCNX1)                                       | 1,83  |
| ENSOCUG00000012344 | KH RNA binding domain containing, signal transduction associated 2(KHDRBS2) | 1,84  |
| ENSOCUG00000007890 | SCO-spondin(SSPO)                                                           | 1,84  |
| ENSOCUG00000012735 | coenzyme Q10B(COQ10B)                                                       | 1,86  |
| ENSOCUG00000015939 | lactate dehydrogenase A(LDHA)                                               | 1,88  |
| ENSOCUG00000017197 | claudin 6(CLDN6)                                                            | 1,89  |
| ENSOCUG00000027184 | carbonyl reductase 1(CBR1)                                                  | 1,90  |
| ENSOCUG00000000483 | calpain 9(CAPN9)                                                            | 1,90  |
| ENSOCUG00000004393 | synaptotagmin-15(LOC100351528)                                              | 1,90  |
| ENSOCUG00000013550 | upstream transcription factor family member 3(USF3)                         | 1,90  |
| ENSOCUG00000011308 | microtubule associated serine/threonine kinase like(MASTL)                  | 1,90  |
| ENSOCUG00000014944 | aldolase, fructose-bisphosphate B(ALDOB)                                    | 1,90  |
| ENSOCUG00000014983 | PPFIA binding protein 2(PPFIBP2)                                            | 1,91  |
| ENSOCUG00000007109 | diaphanous related formin 2(DIAPH2)                                         | 1,93  |
| ENSOCUG00000010708 | kinesin family member C1(KIFC1)                                             | 1,93  |
| ENSOCUG00000007887 | ATP binding cassette subfamily C member 5(ABCC5)                            | 1,93  |
| ENSOCUG00000004543 | apoptosis inducing factor, mitochondria associated 2(AIFM2)                 | 1,94  |

|                    |                                                                      |      |
|--------------------|----------------------------------------------------------------------|------|
| ENSOCUG00000010916 | sacsin molecular chaperone(SACS)                                     | 1,94 |
| ENSOCUG00000005927 | acyl-CoA synthetase medium-chain family member 5(ACSM5)              | 1,95 |
| ENSOCUG00000027823 | amine sulfotransferase-like(LOC100338493)                            | 1,96 |
| ENSOCUG00000006490 | leucine-rich repeat-containing protein 37A2(LOC103346478)            | 1,96 |
| ENSOCUG00000005415 | peroxisomal membrane protein 4(PXMP4)                                | 1,97 |
| ENSOCUG00000024939 | interferon induced protein with tetratricopeptide repeats 2(IFIT2)   | 1,97 |
| ENSOCUG00000011340 | cell division cycle 20(CDC20)                                        | 1,97 |
| ENSOCUG00000007432 | acetyl-CoA carboxylase beta(ACACB)                                   | 1,98 |
| ENSOCUG00000021923 | cut like homeobox 2(CUX2)                                            | 1,98 |
| ENSOCUG00000001335 | myosin IA(MYO1A)                                                     | 1,98 |
| ENSOCUG00000006357 | ADAM metalloproteinase with thrombospondin type 1 motif 12(ADAMTS12) | 1,99 |
| ENSOCUG00000007844 | SOS Ras/Rac guanine nucleotide exchange factor 1(SOS1)               | 1,99 |
| ENSOCUG00000008478 | syntaxin binding protein 4(STXBP4)                                   | 2,00 |
| ENSOCUG00000004231 | BTB domain and CNC homolog 2(BACH2)                                  | 2,01 |
| ENSOCUG00000005912 | 1,4-alpha-glucan branching enzyme 1(GBE1)                            | 2,01 |
| ENSOCUG00000027006 | UDP-glucuronosyltransferase 2B16-like(LOC100340258)                  | 2,03 |
| ENSOCUG00000024065 | nuclear prelamin A recognition factor(NARF)                          | 2,04 |
| ENSOCUG00000017689 | keratin 20(KRT20)                                                    | 2,04 |
| ENSOCUG00000017427 | 3-hydroxy-3-methylglutaryl-CoA reductase(HMGCR)                      | 2,04 |
| ENSOCUG00000002814 | topoisomerase (DNA) II alpha(TOP2A)                                  | 2,04 |
| ENSOCUG00000006386 | ATPase phospholipid transporting 10A (putative)(ATP10A)              | 2,05 |
| ENSOCUG00000007382 | inhibin beta E subunit(INHBE)                                        | 2,06 |
| ENSOCUG00000003203 | TPX2, microtubule nucleation factor(TPX2)                            | 2,06 |
| ENSOCUG00000016909 | RAD51 recombinase(RAD51)                                             | 2,07 |
| ENSOCUG00000013212 | ATP citrate lyase(ACLY)                                              | 2,08 |
| ENSOCUG00000003071 | lipin 1(LPIN1)                                                       | 2,08 |
| ENSOCUG00000008872 | alanyl-tRNA synthetase(AARS)                                         | 2,09 |
| ENSOCUG00000014077 | latent transforming growth factor beta binding protein 2(LTBP2)      | 2,09 |
| ENSOCUG00000022715 | zinc finger homeobox 2(ZFH2)                                         | 2,12 |
| ENSOCUG00000022885 | cytochrome c oxidase subunit 6C(LOC100352363)                        | 2,12 |
| ENSOCUG00000002297 | uncoupling protein 1(UCP1)                                           | 2,12 |
| ENSOCUG00000014801 | acyl-CoA desaturase(LOC100346561)                                    | 2,13 |
| ENSOCUG00000000109 | ADAM metalloproteinase with thrombospondin type 1 motif 9(ADAMTS9)   | 2,14 |
| ENSOCUG00000009367 | SET domain containing lysine methyltransferase 7(SETD7)              | 2,14 |
| ENSOCUG00000017118 | adiponectin receptor 2(ADIPOR2)                                      | 2,14 |
| ENSOCUG00000007182 | growth arrest specific 2 like 3(GAS2L3)                              | 2,15 |
| ENSOCUG00000005820 | ribonucleotide reductase regulatory subunit M2(RRM2)                 | 2,17 |
| ENSOCUG00000006877 | transcription factor CP2 like 1(TFCP2L1)                             | 2,21 |
| ENSOCUG00000001375 | acyl-CoA desaturase(LOC100346046)                                    | 2,21 |
| ENSOCUG00000013772 | tubulin delta 1(TUBD1)                                               | 2,23 |
| ENSOCUG00000013111 | procollagen C-endopeptidase enhancer 2(PCOLCE2)                      | 2,26 |
| ENSOCUG00000007516 | 6-phosphofructo-2-kinase/fructose-2,6-biphosphatase 3(PFKFB3)        | 2,29 |
| ENSOCUG00000013474 | calcium voltage-gated channel subunit alpha1 D(CACNA1D)              | 2,29 |
| ENSOCUG00000012071 | glycerol-3-phosphate acyltransferase 3(GPAT3)                        | 2,30 |
| ENSOCUG00000012148 | inositol 1,4,5-trisphosphate receptor type 1(ITPR1)                  | 2,30 |
| ENSOCUG00000016347 | phosphoethanolamine/phosphocholine phosphatase(PHOSPHO1)             | 2,31 |
| ENSOCUG00000007172 | acyl-CoA desaturase(LOC100357419)                                    | 2,32 |
| ENSOCUG00000001171 | NUF2, NDC80 kinetochore complex component(NUF2)                      | 2,32 |

|                    |                                                                                                                 |      |
|--------------------|-----------------------------------------------------------------------------------------------------------------|------|
| ENSOCUG00000007690 | zinc finger CCCH-type containing 12D(ZC3H12D)                                                                   | 2,32 |
| ENSOCUG00000012902 | glutathione S-transferase Yc(LOC100353428)                                                                      | 2,33 |
| ENSOCUG00000013740 | phosphoglucomutase 2(PGM2)                                                                                      | 2,34 |
| ENSOCUG00000024465 | collagen type VIII alpha 1 chain(COL8A1)                                                                        | 2,35 |
| ENSOCUG00000011953 | centromere protein I(CENPI)                                                                                     | 2,35 |
| ENSOCUG00000026935 | GULP, engulfment adaptor PTB domain containing 1(GULP1)                                                         | 2,35 |
| ENSOCUG00000007701 | KN motif and ankyrin repeat domains 4(KANK4)                                                                    | 2,36 |
| ENSOCUG00000013414 | RasGEF domain family member 1C(RASGEF1C)                                                                        | 2,37 |
| ENSOCUG00000005208 | methylenetetrahydrofolate dehydrogenase (NADP+ dependent) 2,<br>methenyltetrahydrofolate cyclohydrolase(MTHFD2) | 2,37 |
| ENSOCUG00000015780 | transcobalamin 1(TCN1)                                                                                          | 2,38 |
| ENSOCUG00000003467 | prostate stem cell antigen(PSCA)                                                                                | 2,38 |
| ENSOCUG00000017133 | glycerophosphodiester phosphodiesterase domain containing 2(GDPD2)                                              | 2,40 |
| ENSOCUG00000013807 | sperm associated antigen 5(SPAG5)                                                                               | 2,42 |
| ENSOCUG00000008316 | striatin interacting protein 2(STRIP2)                                                                          | 2,42 |
| ENSOCUG00000008179 | rhomboid like 3(RHBDL3)                                                                                         | 2,42 |
| ENSOCUG00000007893 | glycerol-3-phosphate acyltransferase, mitochondrial(GPAM)                                                       | 2,43 |
| ENSOCUG00000005956 | aldehyde dehydrogenase 18 family member A1(ALDH18A1)                                                            | 2,44 |
| ENSOCUG00000015681 | Rac GTPase activating protein 1(RACGAP1)                                                                        | 2,44 |
| ENSOCUG00000027359 | tetraspanin 11(TSPAN11)                                                                                         | 2,45 |
| ENSOCUG00000012480 | bestrophin 4(BEST4)                                                                                             | 2,50 |
| ENSOCUG00000005900 | fibulin 2(FBLN2)                                                                                                | 2,54 |
| ENSOCUG00000010012 | adenylate kinase 4(AK4)                                                                                         | 2,57 |
| ENSOCUG00000003768 | leukemia inhibitory factor(LIF)                                                                                 | 2,59 |
| ENSOCUG00000011000 | growth arrest specific 7(GAS7)                                                                                  | 2,61 |
| ENSOCUG00000022434 | cell division cycle associated 3(CDCA3)                                                                         | 2,62 |
| ENSOCUG00000006777 | family with sequence similarity 102 member B(FAM102B)                                                           | 2,62 |
| ENSOCUG00000014453 | acetyl-CoA carboxylase alpha(ACACA)                                                                             | 2,68 |
| ENSOCUG00000009379 | MIS18 kinetochore protein A(MIS18A)                                                                             | 2,70 |
| ENSOCUG00000011957 | aurora kinase B(AURKB)                                                                                          | 2,71 |
| ENSOCUG00000013069 | ELOVL fatty acid elongase 6(ELOVL6)                                                                             | 2,72 |
| ENSOCUG00000014969 | pyruvate kinase, liver and RBC(PKLR)                                                                            | 2,72 |
| ENSOCUG00000008841 | glutamate-ammonia ligase(GLUL)                                                                                  | 2,72 |
| ENSOCUG00000004106 | glycine decarboxylase(GLDC)                                                                                     | 2,74 |
| ENSOCUG00000010776 | Fanconi anemia complementation group B(FANCB)                                                                   | 2,77 |
| ENSOCUG00000000215 | period circadian clock 2(PER2)                                                                                  | 2,77 |
| ENSOCUG00000022945 | asparagine synthetase (glutamine-hydrolyzing)(ASNS)                                                             | 2,80 |
| ENSOCUG00000022659 | EF-hand and coiled-coil domain containing 1(EFCC1)                                                              | 2,80 |
| ENSOCUG00000013819 | ribosomal protein S6 kinase like 1(RPS6KL1)                                                                     | 2,87 |
| ENSOCUG00000023520 | fibronectin leucine rich transmembrane protein 1(FLRT1)                                                         | 2,91 |
| ENSOCUG00000029751 | transmembrane 9 superfamily member 2(LOC100353059)                                                              | 2,92 |
| ENSOCUG00000002703 | forkhead box M1(FOXM1)                                                                                          | 2,96 |
| ENSOCUG00000007124 | TTK protein kinase(TTK)                                                                                         | 3,03 |
| ENSOCUG00000029228 | leucine rich repeat containing 19(LRRC19)                                                                       | 3,04 |
| ENSOCUG00000009736 | neurotrophic receptor tyrosine kinase 2(NTRK2)                                                                  | 3,04 |
| ENSOCUG00000007213 | high mobility group box 4(HMGB4)                                                                                | 3,05 |
| ENSOCUG00000006288 | ninein like(NINL)                                                                                               | 3,07 |
| ENSOCUG00000004232 | zinc finger and BTB domain containing 20(ZBTB20)                                                                | 3,08 |

|                    |                                                                    |         |
|--------------------|--------------------------------------------------------------------|---------|
| ENSOCUG00000003048 | tubulin polymerization promoting protein(TPPP)                     | 3,09    |
| ENSOCUG00000013321 | retinoic acid early transcript 1E(RAET1E)                          | 3,14    |
| ENSOCUG00000006801 | minichromosome maintenance 10 replication initiation factor(MCM10) | 3,16    |
| ENSOCUG00000000856 | E2F transcription factor 1(E2F1)                                   | 3,23    |
| ENSOCUG00000011488 | Fanconi anemia complementation group I(FANCI)                      | 3,23    |
| ENSOCUG00000003876 | FH2 domain containing 1(FHDC1)                                     | 3,23    |
| ENSOCUG00000007759 | ubiquitin specific peptidase 2(USP2)                               | 3,23    |
| ENSOCUG00000002858 | cyclin dependent kinase 1(CDK1)                                    | 3,24    |
| ENSOCUG00000015803 | tubulointerstitial nephritis antigen(TINAG)                        | 3,30    |
| ENSOCUG00000016718 | mesenteric estrogen dependent adipogenesis(MEDAG)                  | 3,32    |
| ENSOCUG00000013508 | interleukin 17 receptor B(IL17RB)                                  | 3,32    |
| ENSOCUG00000029623 | ATPase plasma membrane Ca <sup>2+</sup> transporting 3(ATP2B3)     | 3,37    |
| ENSOCUG00000026022 | derlin 3(DERL3)                                                    | 3,40    |
| ENSOCUG00000022047 | MPV17 mitochondrial inner membrane protein like(MPV17L)            | 3,40    |
| ENSOCUG00000025868 | gamma-aminobutyric acid type A receptor delta subunit(GABRD)       | 3,41    |
| ENSOCUG00000005465 | nocturnin(NOCT)                                                    | 3,45    |
| ENSOCUG00000029254 | family with sequence similarity 159 member A(FAM159A)              | 3,45    |
| ENSOCUG00000011025 | contactin 4(CNTN4)                                                 | 3,48    |
| ENSOCUG00000016815 | islet cell autoantigen 1(ICA1)                                     | 3,53    |
| ENSOCUG00000004932 | E2F transcription factor 7(E2F7)                                   | 3,61    |
| ENSOCUG00000001673 | triokinase and FMN cyclase(TKFC)                                   | 3,68    |
| ENSOCUG00000009260 | phospholipase C eta 1(PLCH1)                                       | 3,73    |
| ENSOCUG00000001652 | cyclin B2(CCNB2)                                                   | 3,74    |
| ENSOCUG00000011124 | fibroblast growth factor 18(FGF18)                                 | 3,78    |
| ENSOCUG00000009071 | kinesin family member 24(KIF24)                                    | 3,79    |
| ENSOCUG00000011656 | actin like 7A(ACTL7A)                                              | 3,94    |
| ENSOCUG00000001129 | solute carrier family 26 member 3(SLC26A3)                         | 3,98    |
| ENSOCUG00000004485 | E2F transcription factor 8(E2F8)                                   | 4,17    |
| ENSOCUG00000003649 | transmembrane and immunoglobulin domain containing 1(TMIGD1)       | 4,21    |
| ENSOCUG00000006962 | aldehyde dehydrogenase 1 family member L2(ALDH1L2)                 | 4,25    |
| ENSOCUG00000021411 | tsukushi, small leucine rich proteoglycan(TSKU)                    | 4,28    |
| ENSOCUG00000007427 | FAT atypical cadherin 3(FAT3)                                      | 4,39    |
| ENSOCUG00000013792 | kinetochore associated 1(KNTC1)                                    | 4,40    |
| ENSOCUG00000001627 | solute carrier family 6 member 11(SLC6A11)                         | 4,45    |
| ENSOCUG00000000144 | calcium voltage-gated channel auxiliary subunit beta 4(CACNB4)     | 4,50    |
| ENSOCUG00000025494 | secretogranin III(SCG3)                                            | 4,81    |
| ENSOCUG00000009557 | polypeptide N-acetylgalactosaminyltransferase 8(GALNT8)            | 4,82    |
| ENSOCUG00000009880 | dual specificity phosphatase 14(DUSP14)                            | 4,95    |
| ENSOCUG00000027371 | kinesin family member 2C(KIF2C)                                    | 4,98    |
| ENSOCUG00000010814 | malic enzyme 1(ME1)                                                | 5,02    |
| ENSOCUG00000017054 | testis expressed 33(TEX33)                                         | 5,19    |
| ENSOCUG00000017043 | cell division cycle associated 8(CDCA8)                            | 5,19    |
| ENSOCUG00000013544 | ATPase H <sup>+</sup> transporting V0 subunit a4(ATP6V0A4)         | 6,00    |
| ENSOCUG00000001376 | sodium channel protein type 11 subunit alpha(LOC100349709)         | 7,15    |
| ENSOCUG00000006498 | desmoglein 1(DSG1)                                                 | < -0,01 |
| ENSOCUG00000015925 | TNF receptor superfamily member 8(TNFRSF8)                         | < -0,02 |
| ENSOCUG00000016573 | carboxypeptidase, vitellogenic like(CPVL)                          | < -0,02 |
| ENSOCUG00000029301 | zinc finger and SCAN domain containing 23(ZSCAN23)                 | < -0,02 |

|                    |                                                                                        |         |
|--------------------|----------------------------------------------------------------------------------------|---------|
| ENSOCUG00000004632 | carbonic anhydrase 12(CA12)                                                            | < -0,03 |
| ENSOCUG00000005540 | calpain 6(CAPN6)                                                                       | < -0,03 |
| ENSOCUG00000010540 | cyclic nucleotide gated channel beta 1(CNGB1)                                          | < -0,03 |
| ENSOCUG00000012845 | SERTA domain containing 4(SERTAD4)                                                     | < -0,03 |
| ENSOCUG00000016508 | solute carrier family 12 member 1(SLC12A1)                                             | < -0,03 |
| ENSOCUG00000023218 | left-right determination factor 2(LOC100101568)                                        | < -0,03 |
| ENSOCUG00000012514 | X-ray radiation resistance associated 1(XRRA1)                                         | < -0,04 |
| ENSOCUG00000001190 | GDNF family receptor alpha 2(GFRA2)                                                    | < -0,05 |
| ENSOCUG00000002522 | prostaglandin F receptor(PTGFR)                                                        | < -0,05 |
| ENSOCUG00000003021 | ceramide kinase like(CERKL)                                                            | < -0,05 |
| ENSOCUG00000026570 | zinc finger protein 296(ZNF296)                                                        | < -0,06 |
| ENSOCUG00000014051 | interleukin 17 receptor D(IL17RD)                                                      | < -0,07 |
| ENSOCUG00000000771 | C-C motif chemokine 3-like 1(LOC100348776)                                             | < -0,08 |
| ENSOCUG00000023796 | lactotransferrin(LTF)                                                                  | < -0,08 |
| ENSOCUG00000013086 | cytotoxic and regulatory T-cell molecule(CRTAM)                                        | < -0,09 |
| ENSOCUG00000004825 | dopamine receptor D1(DRD1)                                                             | < -0,10 |
| ENSOCUG00000023342 | reticulon 2(RTN2)                                                                      | < -0,10 |
| ENSOCUG00000005968 | purinergic receptor P2Y8(P2RY8)                                                        | < -0,11 |
| ENSOCUG00000022151 | doublecortin domain containing 2B(DCDC2B)                                              | < -0,11 |
| ENSOCUG00000006864 | T-cell surface glycoprotein CD3 epsilon chain(LOC100339529)                            | < -0,12 |
| ENSOCUG00000015699 | acid sensing ion channel subunit 1(ASIC1)                                              | < -0,13 |
| ENSOCUG00000014788 | tudor domain containing 9(TDRD9)                                                       | < -0,17 |
| ENSOCUG00000009994 | transmembrane 6 superfamily member 1(TM6SF1)                                           | < -0,19 |
| ENSOCUG00000015805 | NADPH oxidase 5(NOX5)                                                                  | < -0,19 |
| ENSOCUG00000025107 | membrane associated ring-CH-type finger 4(MARCH4)                                      | < -0,19 |
| ENSOCUG00000021259 | coiled-coil domain containing 74B(CCDC74B)                                             | < -0,20 |
| ENSOCUG00000001717 | src kinase associated phosphoprotein 1(SKAP1)                                          | < -0,21 |
| ENSOCUG00000027509 | C-X3-C motif chemokine receptor 1(CX3CR1)                                              | < -0,21 |
| ENSOCUG00000001863 | vesicle amine transport 1 like(VAT1L)                                                  | < -0,22 |
| ENSOCUG00000002937 | ankyrin repeat and death domain containing 1B(ANKDD1B)                                 | < -0,25 |
| ENSOCUG00000027321 | proline-serine-threonine phosphatase interacting protein 1(PSTPIP1)                    | < -0,31 |
| ENSOCUG00000022335 | defensin NP-3a(LOC100009134)                                                           | < -0,60 |
| ENSOCUG00000016243 | metallothionein 3(MT3)                                                                 | < -0,97 |
| ENSOCUG00000004688 | polycystic kidney and hepatic disease 1 (autosomal recessive)-like 1(PKHD1L1)          | > 0,00  |
| ENSOCUG00000011128 | GLI family zinc finger 1(GLI1)                                                         | > 0,02  |
| ENSOCUG00000000953 | RecQ mediated genome instability 2(RMI2)                                               | > 0,04  |
| ENSOCUG00000005159 | anillin actin binding protein(ANLN)                                                    | > 0,04  |
| ENSOCUG00000006290 | leucine-rich repeat and fibronectin type-III domain-containing protein 5(LOC100349270) | > 0,04  |
| ENSOCUG00000001617 | myotubularin related protein 8(MTMR8)                                                  | > 0,05  |
| ENSOCUG00000004633 | prostaglandin E receptor 3(PTGER3)                                                     | > 0,07  |
| ENSOCUG00000011298 | family with sequence similarity 83 member D(FAM83D)                                    | > 0,07  |
| ENSOCUG00000004978 | cartilage acidic protein 1(CRTAC1)                                                     | > 0,08  |
| ENSOCUG00000022194 | family with sequence similarity 72 member A(FAM72A)                                    | > 0,08  |
| ENSOCUG00000029469 | phosphatidylinositol 3,4,5-trisphosphate 3-phosphatase TPTE2(LOC100346342)             | > 0,08  |
| ENSOCUG00000015149 | thrombospondin type laminin G domain and EAR repeats(TSPPEAR)                          | > 0,09  |
| ENSOCUG00000015368 | family with sequence similarity 83 member A(FAM83A)                                    | > 0,09  |
| ENSOCUG00000016102 | allantoicase(ALLC)                                                                     | > 0,09  |

|                     |                                                                   |        |
|---------------------|-------------------------------------------------------------------|--------|
| ENSOCUG00000001278  | inturned planar cell polarity protein(INTU)                       | > 0,11 |
| ENSOCUG000000015283 | chromosome 9 open reading frame, human C18orf54(C9H18orf54)       | > 0,11 |
| ENSOCUG000000006484 | kinesin family member 27(KIF27)                                   | > 0,12 |
| ENSOCUG000000002926 | DLG associated protein 5(DLGAP5)                                  | > 0,13 |
| ENSOCUG000000000197 | hexokinase 2(HK2)                                                 | > 0,15 |
| ENSOCUG000000010181 | Rho guanine nucleotide exchange factor 39(ARHGEF39)               | > 0,16 |
| ENSOCUG000000010249 | ubiquitin conjugating enzyme E2 T(UBE2T)                          | > 0,17 |
| ENSOCUG000000029613 | zymogen granule membrane protein 16-like(LOC100358477)            | > 0,22 |
| ENSOCUG000000002878 | SLX4 interacting protein(SLX4IP)                                  | > 0,23 |
| ENSOCUG000000009066 | sterile alpha motif domain containing 12(SAMD12)                  | > 0,25 |
| ENSOCUG000000009652 | family with sequence similarity 229 member B(FAM229B)             | > 0,28 |
| ENSOCUG000000023005 | zinc finger protein 367(ZNF367)                                   | > 0,46 |
| ENSOCUG000000010723 | solute carrier family 51 beta subunit(SLC51B)                     | > 0,53 |
| ENSOCUG000000010762 | ChaC glutathione specific gamma-glutamylcyclotransferase 1(CHAC1) | > 0,58 |

---



**Supplementary Table S10.** Functional analysis of the differentially expressed transcripts in liver tissue between vitrified- transferred progeny and that naturally-conceived in F2.

| Category* | Term                                                                                                                                                          | Count | p-value |
|-----------|---------------------------------------------------------------------------------------------------------------------------------------------------------------|-------|---------|
| BP        | fatty acid biosynthetic process                                                                                                                               | 5     | 0,00099 |
| BP        | chorionic trophoblast cell differentiation                                                                                                                    | 3     | 0,0056  |
| BP        | biosynthetic process                                                                                                                                          | 4     | 0,01    |
| BP        | phagocytosis, engulfment                                                                                                                                      | 3     | 0,015   |
| BP        | triglyceride biosynthetic process                                                                                                                             | 3     | 0,015   |
| BP        | trophoblast giant cell differentiation                                                                                                                        | 3     | 0,023   |
| BP        | positive regulation of inflammatory response                                                                                                                  | 4     | 0,027   |
| BP        | positive regulation of osteoblast proliferation                                                                                                               | 3     | 0,028   |
| BP        | positive regulation of tumor necrosis factor production                                                                                                       | 4     | 0,03    |
| BP        | astrocyte development                                                                                                                                         | 3     | 0,039   |
| BP        | positive regulation of DNA endoreduplication                                                                                                                  | 2     | 0,048   |
| BP        | negative regulation of natural killer cell differentiation involved in immune response                                                                        | 2     | 0,048   |
| BP        | growth of symbiont in host                                                                                                                                    | 2     | 0,048   |
| BP        | immune response                                                                                                                                               | 8     | 0,05    |
| BP        | negative regulation of interferon-gamma production                                                                                                            | 3     | 0,057   |
| BP        | circadian regulation of gene expression                                                                                                                       | 4     | 0,064   |
| BP        | acetyl-CoA metabolic process                                                                                                                                  | 2     | 0,071   |
| BP        | negative regulation of transcription involved in G1/S transition of mitotic cell cycle                                                                        | 2     | 0,071   |
| BP        | aortic valve morphogenesis                                                                                                                                    | 2     | 0,071   |
| BP        | regulation of glucose import                                                                                                                                  | 2     | 0,071   |
| BP        | positive regulation of interleukin-5 secretion                                                                                                                | 2     | 0,094   |
| BP        | regulation of hair cycle                                                                                                                                      | 2     | 0,094   |
| BP        | hepatocyte differentiation                                                                                                                                    | 2     | 0,094   |
| BP        | peptidoglycan catabolic process                                                                                                                               | 2     | 0,094   |
| BP        | mitotic spindle midzone assembly                                                                                                                              | 2     | 0,094   |
| BP        | detection of bacterium                                                                                                                                        | 2     | 0,094   |
| BP        | signaling                                                                                                                                                     | 2     | 0,094   |
| BP        | positive regulation of interleukin-13 secretion                                                                                                               | 2     | 0,094   |
| BP        | cellular response to DNA damage stimulus                                                                                                                      | 5     | 0,098   |
| CC        | cell-cell junction                                                                                                                                            | 7     | 0,018   |
| CC        | T cell receptor complex                                                                                                                                       | 3     | 0,019   |
| CC        | extracellular matrix                                                                                                                                          | 6     | 0,026   |
| CC        | extracellular exosome                                                                                                                                         | 54    | 0,043   |
| CC        | chromosome passenger complex                                                                                                                                  | 2     | 0,065   |
| CC        | external side of plasma membrane                                                                                                                              | 7     | 0,093   |
| CC        | mitochondrial membrane                                                                                                                                        | 3     | 0,098   |
| MF        | oxidoreductase activity, acting on paired donors, with oxidation of a pair of donors resulting in the reduction of molecular oxygen to two molecules of water | 3     | 0,0014  |
| MF        | drug binding                                                                                                                                                  | 4     | 0,029   |
| MF        | ATP binding                                                                                                                                                   | 33    | 0,041   |
| MF        | N-acetylmuramoyl-L-alanine amidase activity                                                                                                                   | 2     | 0,043   |
| MF        | acetyl-CoA carboxylase activity                                                                                                                               | 2     | 0,043   |

|      |                                                        |    |         |
|------|--------------------------------------------------------|----|---------|
| MF   | peptidoglycan receptor activity                        | 2  | 0,043   |
| MF   | hydrolase activity, acting on ester bonds              | 3  | 0,046   |
| MF   | calcium ion binding                                    | 16 | 0,066   |
| MF   | E-box binding                                          | 3  | 0,082   |
| MF   | glycerol-3-phosphate O-acyltransferase activity        | 2  | 0,084   |
| MF   | biotin carboxylase activity                            | 2  | 0,084   |
| MF   | microtubule motor activity                             | 4  | 0,095   |
| KEGG | Metabolic pathways                                     | 45 | 0,00016 |
| KEGG | PPAR signaling pathway                                 | 8  | 0,00058 |
| KEGG | Pyruvate metabolism                                    | 6  | 0,0022  |
| KEGG | Glucagon signaling pathway                             | 8  | 0,0033  |
| KEGG | AMPK signaling pathway                                 | 9  | 0,0035  |
| KEGG | Biosynthesis of unsaturated fatty acids                | 5  | 0,0037  |
| KEGG | Fatty acid metabolism                                  | 6  | 0,0052  |
| KEGG | Glycolysis / Gluconeogenesis                           | 6  | 0,012   |
| KEGG | Biosynthesis of antibiotics                            | 11 | 0,018   |
| KEGG | Insulin signaling pathway                              | 8  | 0,018   |
| KEGG | Hematopoietic cell lineage                             | 6  | 0,02    |
| KEGG | Fanconi anemia pathway                                 | 5  | 0,02    |
| KEGG | Fatty acid biosynthesis                                | 3  | 0,023   |
| KEGG | Metabolism of xenobiotics by cytochrome P450           | 6  | 0,036   |
| KEGG | Adipocytokine signaling pathway                        | 5  | 0,046   |
| KEGG | Arrhythmogenic right ventricular cardiomyopathy (ARVC) | 5  | 0,05    |
| KEGG | Mineral absorption                                     | 4  | 0,052   |
| KEGG | Insulin resistance                                     | 6  | 0,063   |
| KEGG | Chemical carcinogenesis                                | 6  | 0,063   |
| KEGG | Carbon metabolism                                      | 6  | 0,1     |

---

\*Functional analysis was referred to the GO term annotation according to the biological process (BP), cellular component (CC) and molecular function (MF) classification, and the KEGG pathways in which they are involved.

**Supplementary Table S11.** Differentially expressed transcripts in liver tissue between vitrified- transferred progeny and that naturally-conceived in F3.

| Gene accession     | Gene name                                                                  | Fold change |
|--------------------|----------------------------------------------------------------------------|-------------|
| ENSOCUG00000014290 | dual oxidase maturation factor 2(LOC100355642)                             | -5,06       |
| ENSOCUG00000001277 | N-terminal EF-hand calcium binding protein 1(NECAB1)                       | -4,70       |
| ENSOCUG00000009306 | La ribonucleoprotein domain family member 6(LARP6)                         | -4,48       |
| ENSOCUG00000007726 | ST6 beta-galactoside alpha-2,6-sialyltransferase 2(ST6GAL2)                | -4,29       |
| ENSOCUG00000000144 | calcium voltage-gated channel auxiliary subunit beta 4(CACNB4)             | -4,26       |
| ENSOCUG00000000658 | bone morphogenetic protein 3(BMP3)                                         | -4,23       |
| ENSOCUG00000009399 | carbonic anhydrase 4(CA4)                                                  | -4,22       |
| ENSOCUG00000009494 | casein beta(CSN2)                                                          | -4,19       |
| ENSOCUG00000017347 | leptin receptor(LEPR)                                                      | -4,08       |
| ENSOCUG00000000706 | formin homology 2 domain containing 3(FHOD3)                               | -4,07       |
| ENSOCUG00000015552 | plexin A4(PLXNA4)                                                          | -4,06       |
| ENSOCUG00000015764 | cyclin dependent kinase like 3(CDKL3)                                      | -3,97       |
| ENSOCUG00000013140 | calmodulin binding transcription activator 1(CAMTA1)                       | -3,93       |
| ENSOCUG00000000370 | ADAM metallopeptidase with thrombospondin type 1 motif 8(ADAMTS8)          | -3,87       |
| ENSOCUG00000001033 | opioid receptor delta 1(OPRD1)                                             | -3,86       |
| ENSOCUG00000012661 | protein tyrosine phosphatase, receptor type U(PTPRU)                       | -3,83       |
| ENSOCUG00000016712 | delta/notch like EGF repeat containing(DNER)                               | -3,79       |
| ENSOCUG00000012685 | paired like homeodomain 2(PITX2)                                           | -3,77       |
| ENSOCUG00000006833 | dynein axonemal heavy chain 12(DNAH12)                                     | -3,76       |
| ENSOCUG00000023975 | butyrophilin subfamily 1 member A1-like(LOC100351205)                      | -3,71       |
| ENSOCUG00000000948 | gamma-aminobutyric acid type A receptor rho1 subunit(GABRR1)               | -3,70       |
| ENSOCUG00000017171 | fibroblast growth factor 21(FGF21)                                         | -3,65       |
| ENSOCUG00000008297 | proteoglycan 2, pro eosinophil major basic protein(PRG2)                   | -3,59       |
| ENSOCUG00000014727 | actin like 6B(ACTL6B)                                                      | -3,56       |
| ENSOCUG00000024982 | butyrophilin-like protein 1(LOC100009510)                                  | -3,53       |
| ENSOCUG00000009285 | chromosome 1 open reading frame, human C11orf53(C1H11orf53)                | -3,52       |
| ENSOCUG00000015664 | tryptophan hydroxylase 2(TPH2)                                             | -3,51       |
| ENSOCUG00000027714 | solute carrier family 23 member 1(LOC100342535)                            | -3,50       |
| ENSOCUG00000014660 | connector enhancer of kinase suppressor of Ras 2(CNKSR2)                   | -3,49       |
| ENSOCUG00000023263 | NDUFA4, mitochondrial complex associated like 2(NDUFA4L2)                  | -3,42       |
| ENSOCUG00000004632 | carbonic anhydrase 12(CA12)                                                | -3,40       |
| ENSOCUG00000005134 | kinocilin(KNCN)                                                            | -3,34       |
| ENSOCUG00000008047 | von Willebrand factor A domain containing 3A(VWA3A)                        | -3,34       |
| ENSOCUG00000010733 | cystic fibrosis transmembrane conductance regulator(CFTR)                  | -3,28       |
| ENSOCUG00000000612 | CD101 molecule(CD101)                                                      | -3,22       |
| ENSOCUG00000014767 | phosphoprotein membrane anchor with glycosphingolipid microdomains 1(PAG1) | -3,21       |
| ENSOCUG00000009532 | AF4/FMR2 family member 3(AFF3)                                             | -3,20       |
| ENSOCUG00000001788 | RAS guanyl releasing protein 1(RASGRP1)                                    | -3,18       |
| ENSOCUG00000003735 | hydroxycarboxylic acid receptor 1(HCAR1)                                   | -3,16       |
| ENSOCUG00000006107 | GRAM domain containing 2(GRAMD2)                                           | -3,16       |
| ENSOCUG00000010199 | oncostatin M(OSM)                                                          | -3,15       |
| ENSOCUG00000008771 | interleukin 1 alpha(IL1A)                                                  | -3,13       |

|                    |                                                                           |       |
|--------------------|---------------------------------------------------------------------------|-------|
| ENSOCUG00000007124 | TTK protein kinase(TTK)                                                   | -3,11 |
| ENSOCUG00000003013 | ADP ribosylation factor like GTPase 11(ARL11)                             | -3,11 |
| ENSOCUG00000017852 | aquaporin 3 (Gill blood group)(AQP3)                                      | -3,06 |
| ENSOCUG00000026551 | lysophosphatidic acid receptor 5(LPAR5)                                   | -3,05 |
| ENSOCUG00000029634 | arachidonate lipoxygenase 3(ALOXE3)                                       | -3,01 |
| ENSOCUG00000000092 | serpin family F member 1(SERPINF1)                                        | -2,97 |
| ENSOCUG00000015893 | proprotein convertase subtilisin/kexin type 2(PCSK2)                      | -2,95 |
| ENSOCUG00000025837 | NFAT activating protein with ITAM motif 1(NFAM1)                          | -2,93 |
| ENSOCUG00000015699 | acid sensing ion channel subunit 1(ASIC1)                                 | -2,91 |
| ENSOCUG00000011279 | membrane associated ring-CH-type finger 1(MARCH1)                         | -2,90 |
| ENSOCUG00000008082 | GTPase activating Rap/RanGAP domain like 3(GARNL3)                        | -2,90 |
| ENSOCUG00000025842 | chromosome 19 open reading frame, human C19orf97(C19H17orf97)             | -2,88 |
| ENSOCUG00000012963 | suppressor of cancer cell invasion(SCAI)                                  | -2,87 |
| ENSOCUG00000000877 | mast cell expressed membrane protein 1(MCEMP1)                            | -2,85 |
| ENSOCUG00000005959 | arachidonate 12-lipoxygenase, 12R type(ALOX12B)                           | -2,85 |
| ENSOCUG00000016029 | IQ motif containing D(IQCD)                                               | -2,83 |
| ENSOCUG00000025779 | C-C motif chemokine receptor 6(CCR6)                                      | -2,82 |
| ENSOCUG00000024244 | C-C motif chemokine receptor 4(CCR4)                                      | -2,80 |
| ENSOCUG00000001355 | IKAROS family zinc finger 3(IKZF3)                                        | -2,78 |
| ENSOCUG00000001103 | caspase 1(CASP1)                                                          | -2,77 |
| ENSOCUG00000008303 | matrix metalloproteinase 12(MMP12)                                        | -2,77 |
| ENSOCUG00000021508 | chromosome 16 open reading frame, human C1orf106(C16H1orf106)             | -2,75 |
| ENSOCUG00000026482 | UDP-glucuronosyltransferase 2B16-like(LOC100340513)                       | -2,75 |
| ENSOCUG00000007438 | complement C3a receptor 1(C3AR1)                                          | -2,74 |
| ENSOCUG00000013226 | BLK proto-oncogene, Src family tyrosine kinase(BLK)                       | -2,74 |
| ENSOCUG00000015787 | beaded filament structural protein 1(BFSP1)                               | -2,73 |
| ENSOCUG00000006204 | ubiquitin associated and SH3 domain containing A(UBASH3A)                 | -2,73 |
| ENSOCUG00000005159 | anillin actin binding protein(ANLN)                                       | -2,72 |
| ENSOCUG00000010247 | ATPase H+ transporting V0 subunit d2(ATP6V0D2)                            | -2,72 |
| ENSOCUG00000014255 | dual oxidase 2(DUOX2)                                                     | -2,71 |
| ENSOCUG00000003578 | anterior gradient 2, protein disulphide isomerase family member(AGR2)     | -2,65 |
| ENSOCUG00000028024 | immunity related GTPase M(IRGM)                                           | -2,65 |
| ENSOCUG00000013081 | angiopoietin like 7(ANGPTL7)                                              | -2,65 |
| ENSOCUG00000016948 | solute carrier organic anion transporter family member 4C1(SLCO4C1)       | -2,64 |
| ENSOCUG00000007151 | cilia and flagella associated protein 70(CFAP70)                          | -2,63 |
| ENSOCUG00000027925 | leukocyte immunoglobulin-like receptor subfamily A member 2(LOC100347041) | -2,63 |
| ENSOCUG00000025839 | retinol dehydrogenase 5(RDH5)                                             | -2,61 |
| ENSOCUG00000008131 | tripartite motif containing 62(TRIM62)                                    | -2,59 |
| ENSOCUG00000004961 | CUGBP, Elav-like family member 2(CELF2)                                   | -2,57 |
| ENSOCUG00000002622 | keratin 75(KRT75)                                                         | -2,56 |
| ENSOCUG00000027244 | uncharacterized LOC100347962(LOC100347962)                                | -2,56 |
| ENSOCUG00000003970 | transgelin 3(TAGLN3)                                                      | -2,55 |
| ENSOCUG00000002486 | collagen type VI alpha 6 chain(COL6A6)                                    | -2,55 |
| ENSOCUG00000016613 | ring finger protein 222(RNF222)                                           | -2,54 |
| ENSOCUG00000009113 | phosphodiesterase 1C(PDE1C)                                               | -2,53 |
| ENSOCUG00000004874 | BTB/POZ domain-containing protein KCTD12(LOC100347604)                    | -2,50 |
| ENSOCUG00000013273 | membrane spanning 4-domains A15(MS4A15)                                   | -2,50 |
| ENSOCUG00000005107 | HOP homeobox(HOPX)                                                        | -2,48 |

|                    |                                                                        |       |
|--------------------|------------------------------------------------------------------------|-------|
| ENSOCUG00000003156 | chromosome 1 open reading frame, human C11orf16(C1H11orf16)            | -2,47 |
| ENSOCUG00000006958 | transmembrane protein 173(TMEM173)                                     | -2,46 |
| ENSOCUG00000009528 | intestinal-type alkaline phosphatase-like(LOC100352107)                | -2,46 |
| ENSOCUG00000022422 | colorectal cancer associated 2(COLCA2)                                 | -2,45 |
| ENSOCUG00000022151 | doublecortin domain containing 2B(DCDC2B)                              | -2,44 |
| ENSOCUG00000021559 | alkaline ceramidase 3(ACER3)                                           | -2,42 |
| ENSOCUG00000007566 | actin, alpha 1, skeletal muscle(ACTA1)                                 | -2,41 |
| ENSOCUG00000016789 | DENN domain containing 2C(DENND2C)                                     | -2,41 |
| ENSOCUG00000016508 | solute carrier family 12 member 1(SLC12A1)                             | -2,40 |
| ENSOCUG00000024433 | Fc fragment of IgE receptor II(FCER2)                                  | -2,40 |
| ENSOCUG00000009077 | membrane spanning 4-domains A2(MS4A2)                                  | -2,38 |
| ENSOCUG00000000962 | origin recognition complex subunit 1(ORC1)                             | -2,38 |
| ENSOCUG00000003665 | C-C motif chemokine receptor 5(CCR5)                                   | -2,36 |
| ENSOCUG00000017547 | calcium voltage-gated channel subunit alpha1 E(CACNA1E)                | -2,36 |
| ENSOCUG00000017805 | caprin family member 2(CAPRIN2)                                        | -2,36 |
| ENSOCUG00000025413 | cytohesin 4(CYTH4)                                                     | -2,35 |
| ENSOCUG00000008543 | tenascin N(TNN)                                                        | -2,34 |
| ENSOCUG00000007053 | steroid 21-hydroxylase(LOC100342636)                                   | -2,33 |
| ENSOCUG00000027044 | TNF receptor superfamily member 25(TNFRSF25)                           | -2,33 |
| ENSOCUG00000021441 | natural killer cell granule protein 7(NKG7)                            | -2,31 |
| ENSOCUG00000010618 | ankyrin 2(ANK2)                                                        | -2,31 |
| ENSOCUG00000015057 | macrophage expressed 1(MPEG1)                                          | -2,31 |
| ENSOCUG00000010753 | G protein-coupled receptor 84(GPR84)                                   | -2,30 |
| ENSOCUG00000011023 | nebulin related anchoring protein(NRAP)                                | -2,30 |
| ENSOCUG00000023473 | guanylate-binding protein 5(LOC100346209)                              | -2,30 |
| ENSOCUG00000010544 | carnitine O-octanoyltransferase(CROT)                                  | -2,29 |
| ENSOCUG00000008553 | prune homolog 2(PRUNE2)                                                | -2,28 |
| ENSOCUG00000008666 | Ras related GTP binding B(RRAGB)                                       | -2,28 |
| ENSOCUG00000000804 | secernin 1(SCRN1)                                                      | -2,27 |
| ENSOCUG00000001824 | toll like receptor 1(TLR1)                                             | -2,27 |
| ENSOCUG00000017422 | integrin subunit alpha X(ITGAX)                                        | -2,27 |
| ENSOCUG00000013948 | Rho GTPase activating protein 20(ARHGAP20)                             | -2,24 |
| ENSOCUG00000009313 | chromosome 4 open reading frame, human C20orf196(C4H20orf196)          | -2,24 |
| ENSOCUG00000002805 | adenosine monophosphate deaminase 3(AMPD3)                             | -2,24 |
| ENSOCUG00000009395 | contactin 1(CNTN1)                                                     | -2,24 |
| ENSOCUG00000013757 | solute carrier family 13 member 2(SLC13A2)                             | -2,23 |
| ENSOCUG00000029253 | guanylate-binding protein 4(LOC100346726)                              | -2,22 |
| ENSOCUG00000002966 | transcriptional repressor GATA binding 1(TRPS1)                        | -2,22 |
| ENSOCUG00000015673 | zona pellucida glycoprotein 1(ZP1)                                     | -2,22 |
| ENSOCUG00000010984 | HLA class I histocompatibility antigen, A-36 alpha chain(LOC100355380) | -2,20 |
| ENSOCUG00000022093 | aggrecan(ACAN)                                                         | -2,20 |
| ENSOCUG00000003215 | sprouty RTK signaling antagonist 4(SPRY4)                              | -2,20 |
| ENSOCUG00000007196 | chromosome unknown open reading frame, human C1orf127(LOC108176210)    | -2,20 |
| ENSOCUG00000002956 | copine 4(CPNE4)                                                        | -2,18 |
| ENSOCUG00000008294 | uroplakin 1B(UPK1B)                                                    | -2,18 |
| ENSOCUG00000001617 | myotubularin related protein 8(MTMR8)                                  | -2,17 |
| ENSOCUG00000017568 | pyrimidinergic receptor P2Y6(P2RY6)                                    | -2,16 |
| ENSOCUG00000022761 | interleukin 3 receptor subunit alpha(IL3RA)                            | -2,16 |

|                    |                                                                                       |       |
|--------------------|---------------------------------------------------------------------------------------|-------|
| ENSOCUG00000007669 | myosin VA(MYO5A)                                                                      | -2,15 |
| ENSOCUG00000023342 | reticulon 2(RTN2)                                                                     | -2,14 |
| ENSOCUG00000014857 | collagen type V alpha 3 chain(COL5A3)                                                 | -2,13 |
| ENSOCUG00000029066 | transient receptor potential cation channel subfamily M member 2(LOC103347481)        | -2,13 |
| ENSOCUG00000004317 | C-X-C motif chemokine receptor 6(CXCR6)                                               | -2,13 |
| ENSOCUG00000015956 | lymphoid restricted membrane protein(LRMP)                                            | -2,12 |
| ENSOCUG00000012244 | perilipin 2(PLIN2)                                                                    | -2,12 |
| ENSOCUG00000006003 | endoplasmic reticulum protein 27(ERP27)                                               | -2,11 |
| ENSOCUG00000017559 | KIAA1147 ortholog(KIAA1147)                                                           | -2,11 |
| ENSOCUG00000021037 | interferon-induced GTP-binding protein Mx2(LOC100009451)                              | -2,10 |
| ENSOCUG00000011452 | coagulation factor XIII A chain(LOC103352261)                                         | -2,09 |
| ENSOCUG00000025033 | KIAA0895 like(KIAA0895L)                                                              | -2,08 |
| ENSOCUG00000012014 | solute carrier family 15 member 1(SLC15A1)                                            | -2,08 |
| ENSOCUG00000004314 | transient receptor potential cation channel subfamily M member 1(TRPM1)               | -2,07 |
| ENSOCUG00000014109 | cell division cycle associated 2(CDCA2)                                               | -2,07 |
| ENSOCUG00000027844 | solute carrier family 24 member 1(SLC24A1)                                            | -2,07 |
| ENSOCUG00000008677 | neuritin 1(NRN1)                                                                      | -2,05 |
| ENSOCUG00000005845 | amyloid beta precursor protein binding family B member 1 interacting protein(APBB1IP) | -2,02 |
| ENSOCUG00000007153 | copine 6(CPNE6)                                                                       | -2,00 |
| ENSOCUG00000008086 | leucine rich repeat containing 15(LRRC15)                                             | -1,99 |
| ENSOCUG00000006002 | amyloid beta precursor like protein 1(APLP1)                                          | -1,98 |
| ENSOCUG00000014189 | annexin A8(ANXA8)                                                                     | -1,96 |
| ENSOCUG00000009317 | minichromosome maintenance 8 homologous recombination repair factor(MCM8)             | -1,95 |
| ENSOCUG00000012337 | collagen type XXI alpha 1 chain(COL21A1)                                              | -1,95 |
| ENSOCUG00000004750 | grainyhead like transcription factor 2(GRHL2)                                         | -1,95 |
| ENSOCUG00000027509 | C-X3-C motif chemokine receptor 1(CX3CR1)                                             | -1,94 |
| ENSOCUG00000006243 | WDFY family member 4(WDFY4)                                                           | -1,94 |
| ENSOCUG00000006248 | interleukin 15 receptor subunit alpha(IL15RA)                                         | -1,94 |
| ENSOCUG00000001241 | major facilitator superfamily domain containing 4A(MFSD4A)                            | -1,94 |
| ENSOCUG00000005775 | MYB proto-oncogene like 2(MYBL2)                                                      | -1,94 |
| ENSOCUG00000012157 | radical S-adenosyl methionine domain containing 2(RSAD2)                              | -1,93 |
| ENSOCUG00000012433 | malic enzyme 2(ME2)                                                                   | -1,93 |
| ENSOCUG00000002661 | protein FAM26F(LOC100353536)                                                          | -1,93 |
| ENSOCUG00000000624 | solute carrier family 26 member 6(SLC26A6)                                            | -1,93 |
| ENSOCUG00000000001 | alcohol dehydrogenase 6(LOC100343992)                                                 | -1,92 |
| ENSOCUG00000000580 | cadherin 16(CDH16)                                                                    | -1,91 |
| ENSOCUG00000026640 | sestrin 3(SESN3)                                                                      | -1,91 |
| ENSOCUG00000015222 | ankyrin repeat domain 45(ANKRD45)                                                     | -1,91 |
| ENSOCUG00000005830 | HIG1 hypoxia inducible domain family member 1A(HIGD1A)                                | -1,91 |
| ENSOCUG00000025013 | solute carrier family 45 member 3(SLC45A3)                                            | -1,90 |
| ENSOCUG00000023957 | mucin 1, cell surface associated(MUC1)                                                | -1,90 |
| ENSOCUG00000022280 | transmembrane protein 45B(TMEM45B)                                                    | -1,89 |
| ENSOCUG00000017198 | tubby bipartite transcription factor(TUB)                                             | -1,89 |
| ENSOCUG00000013618 | phosphorylase kinase catalytic subunit gamma 1(PHKG1)                                 | -1,88 |
| ENSOCUG00000016143 | polypeptide N-acetylgalactosaminyltransferase 6(GALNT6)                               | -1,88 |
| ENSOCUG00000014077 | latent transforming growth factor beta binding protein 2(LTBP2)                       | -1,88 |
| ENSOCUG00000008175 | phosphodiesterase 7A(PDE7A)                                                           | -1,88 |

|                    |                                                                               |       |
|--------------------|-------------------------------------------------------------------------------|-------|
| ENSOCUG00000009360 | macrophage stimulating 1 receptor(MST1R)                                      | -1,87 |
| ENSOCUG00000005766 | inositol 1,4,5-trisphosphate receptor type 3(LOC100008939)                    | -1,87 |
| ENSOCUG00000013609 | lipopolysaccharide binding protein(LBP)                                       | -1,86 |
| ENSOCUG00000000383 | phospholipase A2 group IVE(PLA2G4E)                                           | -1,86 |
| ENSOCUG00000026233 | HRAS-like suppressor 2(LOC100344012)                                          | -1,85 |
| ENSOCUG00000006001 | PLAG1 zinc finger(PLAG1)                                                      | -1,85 |
| ENSOCUG00000001029 | cadherin 17(CDH17)                                                            | -1,84 |
| ENSOCUG00000016405 | EvC ciliary complex subunit 2(EVC2)                                           | -1,84 |
| ENSOCUG00000025809 | reticulon 4 receptor-like 2(RTN4RL2)                                          | -1,82 |
| ENSOCUG00000000418 | purinergic receptor P2Y13(P2RY13)                                             | -1,81 |
| ENSOCUG00000003362 | laeverin(LVRN)                                                                | -1,81 |
| ENSOCUG00000027626 | CD247 molecule(CD247)                                                         | -1,81 |
| ENSOCUG00000000386 | RCAN family member 3(RCAN3)                                                   | -1,80 |
| ENSOCUG00000010687 | potassium voltage-gated channel subfamily A regulatory beta subunit 2(KCNAB2) | -1,80 |
| ENSOCUG00000005455 | NLR family pyrin domain containing 3(NLRP3)                                   | -1,79 |
| ENSOCUG00000012783 | diacylglycerol lipase alpha(DAGLA)                                            | -1,78 |
| ENSOCUG00000011985 | calcium voltage-gated channel subunit alpha1 A(CACNA1A)                       | -1,78 |
| ENSOCUG00000000266 | Wnt family member 2B(WNT2B)                                                   | -1,77 |
| ENSOCUG00000017943 | lymphocyte cytosolic protein 1(LCP1)                                          | -1,77 |
| ENSOCUG00000009012 | Fc receptor like 5(FCRL5)                                                     | -1,77 |
| ENSOCUG00000007382 | inhibin beta E subunit(INHBE)                                                 | -1,76 |
| ENSOCUG00000013808 | G protein-coupled receptor 68(GPR68)                                          | -1,76 |
| ENSOCUG00000001554 | tetratricopeptide repeat, ankyrin repeat and coiled-coil containing 2(TANC2)  | -1,75 |
| ENSOCUG00000006188 | peripherin(PRP)                                                               | -1,75 |
| ENSOCUG00000003091 | adenylate cyclase 7(ADCY7)                                                    | -1,75 |
| ENSOCUG00000004172 | V-set and immunoglobulin domain containing 4(VSIG4)                           | -1,75 |
| ENSOCUG00000001239 | sidekick cell adhesion molecule 1(SDK1)                                       | -1,74 |
| ENSOCUG00000007896 | mast cell immunoglobulin like receptor 1(MILR1)                               | -1,74 |
| ENSOCUG00000010184 | trehalase(TREH)                                                               | -1,74 |
| ENSOCUG00000013684 | transmembrane protein 54(TMEM54)                                              | -1,72 |
| ENSOCUG00000003246 | sulfatase 1(SULF1)                                                            | -1,71 |
| ENSOCUG00000005839 | immunoglobulin like domain containing receptor 2(ILDR2)                       | -1,71 |
| ENSOCUG00000001150 | GTPase, IMAP family member 8(GIMAP8)                                          | -1,70 |
| ENSOCUG00000022477 | arachidonate 15-lipoxygenase(ALOX15)                                          | -1,70 |
| ENSOCUG00000009869 | laminin subunit alpha 3(LAMA3)                                                | -1,70 |
| ENSOCUG00000016877 | protocadherin 20(PCDH20)                                                      | -1,70 |
| ENSOCUG00000029313 | B-cell scaffold protein with ankyrin repeats 1(BANK1)                         | -1,69 |
| ENSOCUG00000005931 | paired immunoglobulin like type 2 receptor alpha(PILRA)                       | -1,69 |
| ENSOCUG00000024196 | F-box protein 17(FBXO17)                                                      | -1,68 |
| ENSOCUG00000010144 | tetratricopeptide repeat domain 22(TTC22)                                     | -1,68 |
| ENSOCUG00000002090 | Ras association domain family member 2(RASSF2)                                | -1,68 |
| ENSOCUG00000002085 | solute carrier family 25 member 36(SLC25A36)                                  | -1,67 |
| ENSOCUG00000002781 | methylenetetrahydrofolate dehydrogenase (NADP+ dependent) 1-like(MTHFD1L)     | -1,66 |
| ENSOCUG00000016771 | prostaglandin-endoperoxide synthase 2(PTGS2)                                  | -1,66 |
| ENSOCUG00000008776 | F-box protein 43(FBXO43)                                                      | -1,66 |
| ENSOCUG00000021564 | toll-like receptor 12(LOC100338778)                                           | -1,66 |
| ENSOCUG00000009557 | polypeptide N-acetylgalactosaminyltransferase 8(GALNT8)                       | -1,66 |
| ENSOCUG00000001616 | proprotein convertase subtilisin/kexin type 5(PCSK5)                          | -1,66 |

|                    |                                                                                                                 |       |
|--------------------|-----------------------------------------------------------------------------------------------------------------|-------|
| ENSOCUG00000026162 | inhibitor of carbonic anhydrase(LOC100345698)                                                                   | -1,66 |
| ENSOCUG00000016556 | G protein-coupled receptor class C group 5 member A(GPRC5A)                                                     | -1,65 |
| ENSOCUG00000014051 | interleukin 17 receptor D(IL17RD)                                                                               | -1,64 |
| ENSOCUG00000016985 | membrane bound O-acyltransferase domain containing 2(MBOAT2)                                                    | -1,64 |
| ENSOCUG00000006725 | lamin tail domain containing 1(LMNTD1)                                                                          | -1,63 |
| ENSOCUG00000002052 | LDL receptor related protein 4(LRP4)                                                                            | -1,63 |
| ENSOCUG00000009332 | mucoilin 3(MCOLN3)                                                                                              | -1,63 |
| ENSOCUG00000009932 | establishment of sister chromatid cohesion N-acetyltransferase 2(ESCO2)                                         | -1,62 |
| ENSOCUG00000000558 | myosin IF(MYO1F)                                                                                                | -1,62 |
| ENSOCUG00000007857 | leucine rich repeat kinase 2(LRRK2)                                                                             | -1,61 |
| ENSOCUG00000016179 | thymocyte selection associated family member 2(THEMIS2)                                                         | -1,61 |
| ENSOCUG00000012271 | tumor necrosis factor superfamily member 13b(TNFSF13B)                                                          | -1,61 |
| ENSOCUG00000001910 | adhesion G protein-coupled receptor L3(ADGRL3)                                                                  | -1,61 |
| ENSOCUG00000016193 | osteomodulin(OMD)                                                                                               | -1,61 |
| ENSOCUG00000003763 | protein tyrosine phosphatase, non-receptor type 22(PTPN22)                                                      | -1,60 |
| ENSOCUG00000012654 | phosphatidylinositol-3,4,5-trisphosphate dependent Rac exchange factor 1(PREX1)                                 | -1,60 |
| ENSOCUG00000013596 | solute carrier family 4 member 7(SLC4A7)                                                                        | -1,59 |
| ENSOCUG00000015363 | neurofascin(NFASC)                                                                                              | -1,58 |
| ENSOCUG00000005208 | methylenetetrahydrofolate dehydrogenase (NADP+ dependent) 2,<br>methenyltetrahydrofolate cyclohydrolase(MTHFD2) | -1,58 |
| ENSOCUG00000025702 | cytochrome P450 4A5-like(LOC100341018)                                                                          | -1,58 |
| ENSOCUG00000003403 | high affinity immunoglobulin gamma Fc receptor I(LOC100358696)                                                  | -1,58 |
| ENSOCUG00000001235 | ADAM metallopeptidase domain 19(ADAM19)                                                                         | -1,57 |
| ENSOCUG00000022873 | transmembrane protein 178B(LOC100357183)                                                                        | -1,57 |
| ENSOCUG00000004392 | forkhead box N3(FOXP3)                                                                                          | -1,56 |
| ENSOCUG00000001426 | integrin subunit beta 7(ITGB7)                                                                                  | -1,56 |
| ENSOCUG00000017539 | spleen associated tyrosine kinase(SYK)                                                                          | -1,56 |
| ENSOCUG00000014498 | solute carrier family 16 member 12(SLC16A12)                                                                    | -1,56 |
| ENSOCUG00000026334 | glycoprotein nmb(GPNMB)                                                                                         | -1,56 |
| ENSOCUG00000010297 | signal induced proliferation associated 1 like 2(SIPA1L2)                                                       | -1,55 |
| ENSOCUG00000017831 | platelet activating factor receptor(PTAFR)                                                                      | -1,54 |
| ENSOCUG00000028059 | NLR family CARD domain containing 3(NLRC3)                                                                      | -1,54 |
| ENSOCUG00000011824 | RIO kinase 1(RIOK1)                                                                                             | -1,54 |
| ENSOCUG00000023225 | colony stimulating factor 2 receptor alpha subunit(CSF2RA)                                                      | -1,54 |
| ENSOCUG00000012238 | NACHT and WD repeat domain containing 2(NWD2)                                                                   | -1,53 |
| ENSOCUG00000011488 | Fanconi anemia complementation group I(FANCI)                                                                   | -1,53 |
| ENSOCUG00000004426 | suppressor of glucose, autophagy associated 1(SOGA1)                                                            | -1,53 |
| ENSOCUG00000005521 | G protein-coupled bile acid receptor 1(GPBAR1)                                                                  | -1,53 |
| ENSOCUG00000010782 | leucine rich repeat containing 8 family member C(LRRC8C)                                                        | -1,52 |
| ENSOCUG00000000256 | protein tyrosine phosphatase domain containing 1(PTPDC1)                                                        | -1,52 |
| ENSOCUG00000009368 | dual specificity phosphatase 22(DUSP22)                                                                         | -1,52 |
| ENSOCUG00000017694 | keratin 23(KRT23)                                                                                               | -1,52 |
| ENSOCUG00000006116 | F-box protein 48(FBXO48)                                                                                        | -1,52 |
| ENSOCUG00000026714 | CD5 molecule like(CD5L)                                                                                         | -1,51 |
| ENSOCUG00000012016 | semaphorin 3D(SEMA3D)                                                                                           | -1,51 |
| ENSOCUG00000002211 | solute carrier family 16 member 14(SLC16A14)                                                                    | -1,51 |
| ENSOCUG00000016775 | NFKB inhibitor delta(NFKBID)                                                                                    | -1,51 |
| ENSOCUG00000010231 | cholinergic receptor nicotinic epsilon subunit(CHRNE)                                                           | -1,51 |



|                    |                                                                                   |       |
|--------------------|-----------------------------------------------------------------------------------|-------|
| ENSOCUG00000012566 | POU class 2 associating factor 1(POU2AF1)                                         | -1,51 |
| ENSOCUG00000009543 | potassium calcium-activated channel subfamily M alpha 1(KCNMA1)                   | -1,50 |
| ENSOCUG00000001754 | formin like 3(FMNL3)                                                              | -1,50 |
| ENSOCUG00000004014 | leucine rich repeat transmembrane neuronal 3(LRRTM3)                              | -1,50 |
| ENSOCUG00000011397 | triggering receptor expressed on myeloid cells 1(LOC100349504)                    | -1,50 |
| ENSOCUG00000000215 | period circadian clock 2(PER2)                                                    | -1,49 |
| ENSOCUG00000011550 | CD86 molecule(CD86)                                                               | -1,49 |
| ENSOCUG00000015721 | CD180 molecule(CD180)                                                             | -1,49 |
| ENSOCUG00000010719 | WD repeat domain 76(WDR76)                                                        | -1,49 |
| ENSOCUG00000009751 | HCK proto-oncogene, Src family tyrosine kinase(HCK)                               | -1,48 |
| ENSOCUG00000006540 | phospholipase C beta 2(PLCB2)                                                     | -1,48 |
| ENSOCUG00000015778 | solute carrier family 25 member 47(SLC25A47)                                      | -1,48 |
| ENSOCUG00000003030 | PARP1 binding protein(PARBP)                                                      | -1,48 |
| ENSOCUG00000002338 | SLAM family member 8(SLAMF8)                                                      | -1,47 |
| ENSOCUG00000007865 | T-cell surface glycoprotein CD3 gamma chain(LOC100355340)                         | -1,47 |
| ENSOCUG00000029605 | odorant-binding protein(LOC103347146)                                             | -1,47 |
| ENSOCUG00000017018 | ring finger protein 152(RNF152)                                                   | -1,46 |
| ENSOCUG00000001185 | G protein-coupled receptor 149(GPR149)                                            | -1,46 |
| ENSOCUG00000022836 | aconitate decarboxylase 1(ACOD1)                                                  | -1,46 |
| ENSOCUG00000009070 | semaphorin 3C(SEMA3C)                                                             | -1,46 |
| ENSOCUG00000004712 | GA binding protein transcription factor beta subunit 2(GABPB2)                    | -1,46 |
| ENSOCUG00000029399 | SH2 domain containing 1B(SH2D1B)                                                  | -1,44 |
| ENSOCUG00000015870 | centrosomal protein 89(CEP89)                                                     | -1,44 |
| ENSOCUG00000010547 | HLF, PAR bZIP transcription factor(HLF)                                           | -1,44 |
| ENSOCUG00000005728 | G protein regulated inducer of neurite outgrowth 2(GPRIN2)                        | -1,43 |
| ENSOCUG00000002192 | post-GPI attachment to proteins 1(PGAP1)                                          | -1,43 |
| ENSOCUG00000017147 | CDP-diacylglycerol synthase 1(CDS1)                                               | -1,43 |
| ENSOCUG00000005167 | angiopoietin like 1(ANGPTL1)                                                      | -1,43 |
| ENSOCUG00000004033 | chromosome 16 open reading frame, human C1orf74(C16H1orf74)                       | -1,43 |
| ENSOCUG00000025681 | leucine rich repeat neuronal 4(LRRN4)                                             | -1,43 |
| ENSOCUG00000009651 | DnaJ heat shock protein family (Hsp40) member B7(DNAJB7)                          | -1,42 |
| ENSOCUG00000010621 | Bruton tyrosine kinase(BTK)                                                       | -1,42 |
| ENSOCUG00000002197 | integrin subunit beta 8(ITGB8)                                                    | -1,42 |
| ENSOCUG00000024091 | solute carrier family 22 member 8(SLC22A8)                                        | -1,42 |
| ENSOCUG00000002480 | SLA class II histocompatibility antigen, DQ haplotype D alpha chain(LOC100343144) | -1,42 |
| ENSOCUG00000014953 | spectrin repeat containing nuclear envelope family member 3(SYNE3)                | -1,42 |
| ENSOCUG00000016192 | cysteinyl leukotriene receptor 1(CYSLTR1)                                         | -1,42 |
| ENSOCUG00000010728 | apolipoprotein A1(APOA1)                                                          | -1,42 |
| ENSOCUG00000002231 | very low density lipoprotein receptor(VLDLR)                                      | -1,42 |
| ENSOCUG00000006043 | ubiquitin specific peptidase 13 (isopeptidase T-3)(USP13)                         | -1,42 |
| ENSOCUG00000006029 | alpha-2-macroglobulin(LOC100349077)                                               | -1,41 |
| ENSOCUG00000010941 | carboxypeptidase X, M14 family member 2(CPXM2)                                    | -1,41 |
| ENSOCUG00000009801 | cysteine rich hydrophobic domain 1(CHIC1)                                         | -1,41 |
| ENSOCUG00000015479 | POU class 2 homeobox 1(POU2F1)                                                    | -1,41 |
| ENSOCUG00000022385 | nidogen-1(LOC103347221)                                                           | -1,40 |
| ENSOCUG00000024216 | myosin IG(MYO1G)                                                                  | -1,40 |
| ENSOCUG00000000830 | dedicator of cytokinesis 2(DOCK2)                                                 | -1,40 |
| ENSOCUG00000027586 | EPM2A interacting protein 1(EPM2AIP1)                                             | -1,39 |

|                    |                                                                                |       |
|--------------------|--------------------------------------------------------------------------------|-------|
| ENSOCUG00000008236 | lipoprotein lipase(LPL)                                                        | -1,39 |
| ENSOCUG00000023075 | plectin(LOC100349129)                                                          | -1,39 |
| ENSOCUG00000011752 | pygopus family PHD finger 1(PYGO1)                                             | -1,39 |
| ENSOCUG00000011054 | phosphatidylinositol-4,5-bisphosphate 3-kinase catalytic subunit delta(PIK3CD) | -1,39 |
| ENSOCUG00000006708 | actin filament associated protein 1(AFAP1)                                     | -1,39 |
| ENSOCUG00000005885 | immunoglobulin superfamily member 10(IGSF10)                                   | -1,38 |
| ENSOCUG00000010659 | ADAM metallopeptidase domain 23(ADAM23)                                        | -1,38 |
| ENSOCUG00000009276 | myosin binding protein C, slow type(MYBPC1)                                    | -1,37 |
| ENSOCUG00000001587 | integrin alpha-M(LOC100351865)                                                 | -1,37 |
| ENSOCUG00000017504 | synaptotagmin 9(SYT9)                                                          | -1,37 |
| ENSOCUG00000015877 | secreted frizzled related protein 4(SFRP4)                                     | -1,37 |
| ENSOCUG00000014633 | PBX/knotted 1 homeobox 2(PKNOX2)                                               | -1,37 |
| ENSOCUG00000015623 | plexin A3(PLXNA3)                                                              | -1,37 |
| ENSOCUG00000007763 | calcium voltage-gated channel auxiliary subunit alpha2delta 1(CACNA2D1)        | -1,37 |
| ENSOCUG00000002018 | UHRF1 binding protein 1(UHRF1BP1)                                              | -1,37 |
| ENSOCUG00000014786 | INO80 complex subunit D(INO80D)                                                | -1,36 |
| ENSOCUG00000000960 | sidekick cell adhesion molecule 2(SDK2)                                        | -1,36 |
| ENSOCUG00000004804 | feline leukemia virus subgroup C cellular receptor 1(FLVCR1)                   | -1,35 |
| ENSOCUG00000003405 | major facilitator superfamily domain containing 6(MFSD6)                       | -1,35 |
| ENSOCUG00000029469 | phosphatidylinositol 3,4,5-trisphosphate 3-phosphatase TPTE2(LOC100346342)     | -1,35 |
| ENSOCUG00000006445 | frizzled class receptor 4(FZD4)                                                | -1,35 |
| ENSOCUG00000016347 | phosphoethanolamine/phosphocholine phosphatase(PHOSPHO1)                       | -1,35 |
| ENSOCUG00000000534 | lymphocyte cytosolic protein 2(LCP2)                                           | -1,34 |
| ENSOCUG00000000136 | basonuclin 1(BNC1)                                                             | -1,34 |
| ENSOCUG00000003720 | dual specificity phosphatase 4(DUSP4)                                          | -1,34 |
| ENSOCUG00000009774 | lysosomal protein transmembrane 5(LAPTM5)                                      | -1,34 |
| ENSOCUG00000002530 | prostaglandin-endoperoxide synthase 1(PTGS1)                                   | -1,34 |
| ENSOCUG00000014567 | acyloxyacyl hydrolase(AOAH)                                                    | -1,33 |
| ENSOCUG00000004988 | lysyl oxidase like 4(LOXL4)                                                    | -1,33 |
| ENSOCUG00000004275 | semaphorin 5A(SEMA5A)                                                          | -1,32 |
| ENSOCUG00000017204 | DAB1, reelin adaptor protein(DAB1)                                             | -1,32 |
| ENSOCUG00000007759 | ubiquitin specific peptidase 2(USP2)                                           | -1,31 |
| ENSOCUG00000022167 | complement C5a receptor 1(C5AR1)                                               | -1,31 |
| ENSOCUG00000029622 | SLAM family member 9(LOC103350037)                                             | -1,30 |
| ENSOCUG00000000718 | solute carrier family 1 member 2(SLC1A2)                                       | -1,30 |
| ENSOCUG00000015570 | FRY microtubule binding protein(FRY)                                           | -1,30 |
| ENSOCUG00000003701 | toll like receptor 10(TLR10)                                                   | -1,30 |
| ENSOCUG00000024364 | MIER family member 2(MIER2)                                                    | -1,30 |
| ENSOCUG00000009379 | MIS18 kinetochore protein A(MIS18A)                                            | -1,29 |
| ENSOCUG00000013916 | protein kinase C beta(PRKCB)                                                   | -1,29 |
| ENSOCUG00000001920 | G protein-coupled receptor class C group 5 member B(GPRC5B)                    | -1,29 |
| ENSOCUG00000002071 | glycerol-3-phosphate acyltransferase 4(GPAT4)                                  | -1,29 |
| ENSOCUG00000029457 | hamartin(LOC103346667)                                                         | -1,29 |
| ENSOCUG00000007916 | glucosaminyl (N-acetyl) transferase 1, core 2(GCNT1)                           | -1,28 |
| ENSOCUG00000012990 | LON peptidase N-terminal domain and ring finger 3(LONRF3)                      | -1,28 |
| ENSOCUG00000011956 | cadherin related family member 2(CDHR2)                                        | -1,28 |
| ENSOCUG00000006113 | pleckstrin(PLEK)                                                               | -1,28 |
| ENSOCUG00000010101 | interferon regulatory factor 5(IRF5)                                           | -1,28 |

|                    |                                                                     |       |
|--------------------|---------------------------------------------------------------------|-------|
| ENSOCUG00000013467 | ring finger protein 150(RNF150)                                     | -1,28 |
| ENSOCUG00000012402 | uroplakin-3b(LOC100355286)                                          | -1,28 |
| ENSOCUG00000023355 | myosin VIIA(MYO7A)                                                  | -1,27 |
| ENSOCUG00000002553 | elastin microfibril interfacier 2(EMILIN2)                          | -1,27 |
| ENSOCUG00000026567 | histocompatibility antigen DM heterodimer light chain-like(RLA-DMB) | -1,27 |
| ENSOCUG00000013517 | NCK associated protein 1 like(NCKAP1L)                              | -1,27 |
| ENSOCUG00000024108 | potassium voltage-gated channel subfamily C member 3(LOC100338015)  | -1,27 |
| ENSOCUG00000025513 | insulin like growth factor binding protein 5(IGFBP5)                | -1,27 |
| ENSOCUG00000014740 | solute carrier family 37 member 2(SLC37A2)                          | -1,26 |
| ENSOCUG00000029435 | ligand-dependent corepressor(LOC100343926)                          | -1,26 |
| ENSOCUG00000026260 | solute carrier family 6 member 8(SLC6A8)                            | -1,26 |
| ENSOCUG00000013550 | upstream transcription factor family member 3(USF3)                 | -1,26 |
| ENSOCUG00000009436 | cyclic nucleotide gated channel alpha 2(CNGA2)                      | -1,26 |
| ENSOCUG00000012620 | Werner syndrome RecQ like helicase(WRN)                             | -1,26 |
| ENSOCUG00000010987 | transmembrane protein 26(TMEM26)                                    | -1,26 |
| ENSOCUG00000009050 | reelin(RELN)                                                        | -1,26 |
| ENSOCUG00000000401 | hexokinase 3(HK3)                                                   | -1,26 |
| ENSOCUG00000000763 | phospholipase A2 group VII(PLA2G7)                                  | -1,26 |
| ENSOCUG00000027817 | protein phosphatase 1 regulatory subunit 16B(PPP1R16B)              | -1,25 |
| ENSOCUG00000013120 | polyhomeotic homolog 3(PHC3)                                        | -1,25 |
| ENSOCUG00000011691 | serine/threonine kinase 17b(STK17B)                                 | -1,25 |
| ENSOCUG00000009478 | Rho GTPase activating protein 31(ARHGAP31)                          | -1,25 |
| ENSOCUG00000000007 | GLI pathogenesis related 2(GLIPR2)                                  | -1,25 |
| ENSOCUG00000006803 | ectonucleoside triphosphate diphosphohydrolase 5(ENTPD5)            | -1,25 |
| ENSOCUG00000016651 | AXL receptor tyrosine kinase(AXL)                                   | -1,25 |
| ENSOCUG00000003221 | lysine demethylase 7A(KDM7A)                                        | -1,25 |
| ENSOCUG00000014964 | ATP binding cassette subfamily B member 4(ABCB4)                    | -1,25 |
| ENSOCUG00000014482 | plexin domain containing 2(PLXDC2)                                  | -1,24 |
| ENSOCUG00000017793 | CD38 molecule(CD38)                                                 | -1,24 |
| ENSOCUG00000028137 | indian hedgehog(IHH)                                                | -1,24 |
| ENSOCUG00000008922 | FGR proto-oncogene, Src family tyrosine kinase(FGR)                 | -1,24 |
| ENSOCUG00000014795 | insulin like growth factor 1 receptor(IGF1R)                        | -1,24 |
| ENSOCUG00000008600 | formyl peptide receptor 1(FPR1)                                     | -1,24 |
| ENSOCUG00000021438 | adhesion G protein-coupled receptor E5(ADGRE5)                      | -1,23 |
| ENSOCUG00000015483 | fatty acid binding protein 4(FABP4)                                 | -1,23 |
| ENSOCUG00000001711 | trophinin(TRO)                                                      | -1,23 |
| ENSOCUG00000024991 | alpha kinase 1(ALPK1)                                               | -1,23 |
| ENSOCUG00000009447 | oxysterol binding protein like 7(OSBPL7)                            | -1,23 |
| ENSOCUG00000002306 | protease, serine, 8(PRSS8)                                          | -1,22 |
| ENSOCUG00000006497 | peroxidasin(PXDN)                                                   | -1,22 |
| ENSOCUG00000010918 | FER tyrosine kinase(FER)                                            | -1,22 |
| ENSOCUG00000009042 | CNKSR family member 3(CNKSR3)                                       | -1,22 |
| ENSOCUG00000012372 | lipin 3(LPIN3)                                                      | -1,21 |
| ENSOCUG00000015909 | heparin binding EGF like growth factor(HBEGF)                       | -1,21 |
| ENSOCUG00000002566 | sex hormone binding globulin(SHBG)                                  | -1,21 |
| ENSOCUG00000011309 | plexin domain containing 1(PLXDC1)                                  | -1,21 |
| ENSOCUG00000008291 | bridging integrator 2(BIN2)                                         | -1,21 |
| ENSOCUG00000022214 | acyl-coenzyme A thioesterase 4(LOC100343752)                        | -1,21 |

|                    |                                                                                               |       |
|--------------------|-----------------------------------------------------------------------------------------------|-------|
| ENSOCUG00000011981 | protein tyrosine phosphatase, receptor type C(PTPRC)                                          | -1,21 |
| ENSOCUG00000023778 | CD300a molecule(CD300A)                                                                       | -1,21 |
| ENSOCUG00000001006 | tachykinin receptor 1(TACR1)                                                                  | -1,21 |
| ENSOCUG00000013642 | dedicator of cytokinesis 11(DOCK11)                                                           | -1,21 |
| ENSOCUG00000016755 | UDP-glucuronosyltransferase 2A3(LOC100359229)                                                 | -1,20 |
| ENSOCUG00000008757 | myoferlin(MYOF)                                                                               | -1,20 |
| ENSOCUG00000003924 | apolipoprotein L3(LOC100350735)                                                               | -1,20 |
| ENSOCUG00000010012 | adenylate kinase 4(AK4)                                                                       | -1,20 |
| ENSOCUG00000010637 | minichromosome maintenance complex component 5(MCM5)                                          | -1,20 |
| ENSOCUG00000016343 | regulator of telomere elongation helicase 1(RTEL1)                                            | -1,19 |
| ENSOCUG00000002613 | versican(VCAN)                                                                                | -1,19 |
| ENSOCUG00000024739 | zinc finger BED-type containing 6(ZBED6)                                                      | -1,19 |
| ENSOCUG00000025736 | apolipoprotein B mRNA editing enzyme catalytic subunit 1(APOBEC1)                             | -1,19 |
| ENSOCUG00000016115 | ras-related C3 botulinum toxin substrate 2 (rho family, small GTP binding protein Rac2)(RAC2) | -1,19 |
| ENSOCUG00000023116 | protein argonaute-1(LOC100347349)                                                             | -1,19 |
| ENSOCUG00000006571 | OTU deubiquitinase 3(OTUD3)                                                                   | -1,19 |
| ENSOCUG00000008656 | guanylate-binding protein 5(LOC100349257)                                                     | -1,19 |
| ENSOCUG00000011935 | PTC7 protein phosphatase homolog(PPTC7)                                                       | -1,19 |
| ENSOCUG00000026383 | aldo-keto reductase family 1 member B10(AKR1B10)                                              | -1,19 |
| ENSOCUG00000000786 | EPH receptor A2(EPHA2)                                                                        | -1,19 |
| ENSOCUG00000007922 | ST8 alpha-N-acetyl-neuraminide alpha-2,8-sialyltransferase 4(ST8SIA4)                         | -1,19 |
| ENSOCUG00000004618 | CKLF like MARVEL transmembrane domain containing 4(CMTM4)                                     | -1,19 |
| ENSOCUG00000016280 | C-X-C motif chemokine ligand 10(CXCL10)                                                       | -1,18 |
| ENSOCUG00000017892 | zinc finger CCCH-type containing, antiviral 1(ZC3HAV1)                                        | -1,18 |
| ENSOCUG00000024065 | nuclear prelamin A recognition factor(NARF)                                                   | -1,18 |
| ENSOCUG00000005237 | protocadherin 17(PCDH17)                                                                      | -1,18 |
| ENSOCUG00000001289 | septin 11(SEPT11)                                                                             | -1,18 |
| ENSOCUG00000029190 | placenta specific 8(PLAC8)                                                                    | -1,18 |
| ENSOCUG00000028062 | GTPase, IMAP family member 1(GIMAP1)                                                          | -1,18 |
| ENSOCUG00000022216 | collectin subfamily member 12(COLEC12)                                                        | -1,18 |
| ENSOCUG00000013760 | neuralized E3 ubiquitin protein ligase 1(NEURL1)                                              | -1,18 |
| ENSOCUG00000014820 | cytochrome b reductase 1(LOC100346448)                                                        | -1,18 |
| ENSOCUG00000010563 | TAP binding protein(TAPBP)                                                                    | -1,17 |
| ENSOCUG00000002485 | HLA class II histocompatibility antigen, DQ beta 1 chain(LOC100351163)                        | -1,17 |
| ENSOCUG00000001594 | solute carrier family 16 member 6(SLC16A6)                                                    | -1,17 |
| ENSOCUG00000000575 | hepatitis A virus cellular receptor 1(HAVCR1)                                                 | -1,17 |
| ENSOCUG00000012814 | TROVE domain family member 2(TROVE2)                                                          | -1,16 |
| ENSOCUG00000012148 | inositol 1,4,5-trisphosphate receptor type 1(ITPR1)                                           | -1,16 |
| ENSOCUG00000000715 | CD44 molecule (Indian blood group)(CD44)                                                      | -1,16 |
| ENSOCUG00000007286 | collagen type IV alpha 4 chain(COL4A4)                                                        | -1,15 |
| ENSOCUG00000004436 | insulin receptor(INSR)                                                                        | -1,15 |
| ENSOCUG00000011764 | LIM domain containing preferred translocation partner in lipoma(LPP)                          | -1,15 |
| ENSOCUG00000014976 | ERCC excision repair 4, endonuclease catalytic subunit(ERCC4)                                 | -1,15 |
| ENSOCUG00000014646 | fasciculation and elongation protein zeta 1(FEZ1)                                             | -1,15 |
| ENSOCUG00000001481 | family with sequence similarity 65 member B(FAM65B)                                           | -1,14 |
| ENSOCUG00000004942 | protein kinase AMP-activated catalytic subunit alpha 2(PRKAA2)                                | -1,14 |
| ENSOCUG00000025241 | liver carboxylesterase 2-like(LOC100357214)                                                   | -1,14 |

|                    |                                                                           |       |
|--------------------|---------------------------------------------------------------------------|-------|
| ENSOCUG00000009311 | CD84 molecule(CD84)                                                       | -1,14 |
| ENSOCUG00000006719 | lysophosphatidylcholine acyltransferase 2(LPCAT2)                         | -1,14 |
| ENSOCUG00000002281 | cytochrome P450 2U1(LOC100353947)                                         | -1,13 |
| ENSOCUG00000015138 | complement component 1, q subcomponent, C chain(C1QC)                     | -1,13 |
| ENSOCUG00000012906 | SPARC related modular calcium binding 2(SMOC2)                            | -1,13 |
| ENSOCUG00000008688 | cilia and flagella associated protein 43(CFAP43)                          | -1,13 |
| ENSOCUG00000007380 | inhibin beta C subunit(INHBC)                                             | -1,13 |
| ENSOCUG00000004808 | Cbl proto-oncogene(CBL)                                                   | -1,13 |
| ENSOCUG00000011350 | spondin 1(SPON1)                                                          | -1,13 |
| ENSOCUG0000001060  | ankyrin repeat domain 13A(ANKRD13A)                                       | -1,13 |
| ENSOCUG00000002935 | family with sequence similarity 46 member C(FAM46C)                       | -1,13 |
| ENSOCUG00000012779 | G protein-coupled receptor 137B(GPR137B)                                  | -1,12 |
| ENSOCUG00000000142 | coagulation factor VIII(F8)                                               | -1,12 |
| ENSOCUG00000023891 | DNA damage inducible 1 homolog 2(DDI2)                                    | -1,12 |
| ENSOCUG00000026291 | arrestin beta 1(ARRB1)                                                    | -1,11 |
| ENSOCUG00000003729 | nuclear factor related to kappaB binding protein(NFRKB)                   | -1,11 |
| ENSOCUG00000006350 | solute carrier family 12 member 4(SLC12A4)                                | -1,11 |
| ENSOCUG00000013527 | abhydrolase domain containing 2(ABHD2)                                    | -1,10 |
| ENSOCUG00000005112 | F-box protein 32(FBXO32)                                                  | -1,10 |
| ENSOCUG00000000427 | peptidase M20 domain containing 1(PM20D1)                                 | -1,09 |
| ENSOCUG00000027006 | UDP-glucuronosyltransferase 2B16-like(LOC100340258)                       | -1,08 |
| ENSOCUG00000006566 | X-linked Kx blood group(XK)                                               | -1,08 |
| ENSOCUG00000026015 | liver carboxylesterase 2-like(LOC100358248)                               | -1,07 |
| ENSOCUG00000011544 | integrin subunit beta 2(ITGB2)                                            | -1,07 |
| ENSOCUG00000001497 | fatty acid binding protein 7(FABP7)                                       | 1,08  |
| ENSOCUG00000015313 | cytochrome c oxidase protein 20 homolog(LOC100349428)                     | 1,10  |
| ENSOCUG00000014585 | zinc finger DHHC-type containing 2(ZDHHC2)                                | 1,12  |
| ENSOCUG00000000688 | F-box protein 27(FBXO27)                                                  | 1,13  |
| ENSOCUG00000004733 | prostaglandin-E(2) 9-reductase-like(PGER2)                                | 1,13  |
| ENSOCUG00000005985 | clusterin(CLU)                                                            | 1,13  |
| ENSOCUG00000024462 | 60S ribosomal protein L27(LOC100356974)                                   | 1,14  |
| ENSOCUG00000014776 | solute carrier family 26 member 8(SLC26A8)                                | 1,17  |
| ENSOCUG00000017350 | glycosyltransferase 1 domain containing 1(GLT1D1)                         | 1,17  |
| ENSOCUG00000002702 | radical S-adenosyl methionine domain containing 1(RSAD1)                  | 1,18  |
| ENSOCUG00000024412 | serum amyloid A-4 protein(LOC100342244)                                   | 1,20  |
| ENSOCUG00000003858 | glycine N-methyltransferase(GNMT)                                         | 1,21  |
| ENSOCUG00000029478 | fragile X mental retardation 1 neighbor(FMR1NB)                           | 1,23  |
| ENSOCUG00000006681 | ATP synthase, H+ transporting, mitochondrial Fo complex subunit F6(ATP5J) | 1,24  |
| ENSOCUG00000008329 | ADAM metallopeptidase with thrombospondin type 1 motif 19(ADAMTS19)       | 1,24  |
| ENSOCUG00000007493 | isopentenyl-diphosphate Delta-isomerase 1(LOC100343510)                   | 1,25  |
| ENSOCUG00000016551 | C1q and tumor necrosis factor related protein 7(C1QTNF7)                  | 1,28  |
| ENSOCUG00000009195 | C-type lectin domain family 4 member E(CLEC4E)                            | 1,30  |
| ENSOCUG00000029235 | metallothionein-1A(LOC100343802)                                          | 1,31  |
| ENSOCUG00000004160 | family with sequence similarity 107 member A(FAM107A)                     | 1,34  |
| ENSOCUG00000012902 | glutathione S-transferase Yc(LOC100353428)                                | 1,34  |
| ENSOCUG00000015329 | matrix metallopeptidase 7(MMP7)                                           | 1,36  |
| ENSOCUG00000008193 | actin, alpha 2, smooth muscle, aorta(ACTA2)                               | 1,37  |
| ENSOCUG00000023425 | alpha-fetoprotein(LOC103350776)                                           | 1,37  |

|                    |                                                                                                                                |      |
|--------------------|--------------------------------------------------------------------------------------------------------------------------------|------|
| ENSOCUG00000014505 | tribbles pseudokinase 3(TRIB3)                                                                                                 | 1,37 |
| ENSOCUG00000009825 | biphenyl hydrolase like(BPHL)                                                                                                  | 1,40 |
| ENSOCUG00000009769 | immunoglobulin superfamily member 1(IGSF1)                                                                                     | 1,40 |
| ENSOCUG00000007890 | SCO-spondin(SSPO)                                                                                                              | 1,41 |
| ENSOCUG00000016210 | RAB15 effector protein(REP15)                                                                                                  | 1,41 |
| ENSOCUG00000010814 | malic enzyme 1(ME1)                                                                                                            | 1,41 |
| ENSOCUG00000006139 | semaphorin 5B(SEMA5B)                                                                                                          | 1,45 |
| ENSOCUG00000015111 | glutamate ionotropic receptor NMDA type subunit 2B(GRIN2B)                                                                     | 1,50 |
| ENSOCUG00000008104 | growth differentiation factor 6(GDF6)                                                                                          | 1,52 |
| ENSOCUG00000008571 | myomesin 1(MYOM1)                                                                                                              | 1,52 |
| ENSOCUG00000016772 | DNA damage inducible transcript 4(DDIT4)                                                                                       | 1,53 |
| ENSOCUG00000009725 | acyl-CoA wax alcohol acyltransferase 1(AWAT1)                                                                                  | 1,54 |
| ENSOCUG00000002542 | solute carrier family 22 member 2(SLC22A2)                                                                                     | 1,62 |
| ENSOCUG00000015619 | calbindin 2(CALB2)                                                                                                             | 1,64 |
| ENSOCUG00000015771 | squalene epoxidase(SQLE)                                                                                                       | 1,70 |
| ENSOCUG00000008109 | chromosome 3 open reading frame, human C8orf34(C3H8orf34)                                                                      | 1,70 |
| ENSOCUG00000024372 | trace amine-associated receptor 4(TAAR4)                                                                                       | 1,71 |
| ENSOCUG00000007266 | sodium channel protein type 1 subunit alpha(LOC100009591)                                                                      | 1,75 |
| ENSOCUG00000017620 | serum amyloid protein A(LOC100009259)                                                                                          | 1,79 |
| ENSOCUG00000013412 | C-C motif chemokine 7(LOC103351517)                                                                                            | 1,81 |
| ENSOCUG00000004297 | otoancorin(OTOA)                                                                                                               | 1,81 |
| ENSOCUG00000010549 | monocyte to macrophage differentiation associated(MMD)                                                                         | 1,85 |
| ENSOCUG00000013324 | hypocretin neuropeptide precursor(HCRT)                                                                                        | 1,86 |
| ENSOCUG00000015777 | potassium voltage-gated channel subfamily D member 1(KCND1)                                                                    | 1,96 |
| ENSOCUG00000012939 | ectonucleotide pyrophosphatase/phosphodiesterase 5 (putative)(ENPP5)                                                           | 2,03 |
| ENSOCUG00000013934 | coiled-coil domain containing 189(CCDC189)                                                                                     | 2,07 |
| ENSOCUG00000025992 | butyrophilin subfamily 1 member A1-like(LOC100344369)                                                                          | 2,09 |
| ENSOCUG00000007327 | contactin associated protein 1(CNTNAP1)                                                                                        | 2,10 |
| ENSOCUG00000027125 | ATP-binding cassette sub-family A member 3(LOC100353012)                                                                       | 2,31 |
| ENSOCUG00000029754 | TSSK6 activating cochaperone(TSACC)                                                                                            | 2,32 |
| ENSOCUG00000021120 | mucin 15, cell surface associated(MUC15)                                                                                       | 2,32 |
| ENSOCUG00000025107 | membrane associated ring-CH-type finger 4(MARCH4)                                                                              | 2,33 |
| ENSOCUG00000027492 | zymogen granule membrane protein 16(LOC100346271)                                                                              | 2,36 |
| ENSOCUG00000005346 | tudor domain containing 15(TDRD15)                                                                                             | 2,41 |
| ENSOCUG00000006124 | leukemia NUP98 fusion partner 1(LNP1)                                                                                          | 2,47 |
| ENSOCUG00000026936 | delta like non-canonical Notch ligand 1(DLK1)                                                                                  | 2,51 |
| ENSOCUG00000001309 | isthmin 1(ISM1)                                                                                                                | 2,52 |
| ENSOCUG00000002462 | solute carrier family 24 member 2(SLC24A2)                                                                                     | 2,55 |
| ENSOCUG00000013373 | sperm tail PG-rich repeat containing 1(STPG1)                                                                                  | 2,64 |
| ENSOCUG00000011025 | contactin 4(CNTN4)                                                                                                             | 2,67 |
| ENSOCUG00000009438 | claudin 10(CLDN10)                                                                                                             | 2,80 |
| ENSOCUG00000026267 | aldo-keto reductase family 1, member C1 (dihydrodiol dehydrogenase 1; 20-alpha (3-alpha)-hydroxysteroid dehydrogenase)(AKR1C5) | 2,83 |
| ENSOCUG00000003017 | glutamate rich 3(ERICH3)                                                                                                       | 2,98 |
| ENSOCUG00000008391 | GDNF family receptor alpha 3(GFRA3)                                                                                            | 2,99 |
| ENSOCUG00000029690 | zymogen granule membrane protein 16(LOC100350057)                                                                              | 3,03 |
| ENSOCUG00000021940 | putative alpha-1-antitrypsin-related protein(LOC100358746)                                                                     | 3,08 |
| ENSOCUG00000003953 | chromosome 13 open reading frame, human C1orf146(C13H1orf146)                                                                  | 3,17 |

|                    |                                                                                        |         |
|--------------------|----------------------------------------------------------------------------------------|---------|
| ENSOCUG00000015301 | sodium voltage-gated channel beta subunit 1(SCN1B)                                     | 3,27    |
| ENSOCUG00000029599 | killer cell lectin like receptor B1(KLRB1)                                             | 3,32    |
| ENSOCUG00000016764 | myelin transcription factor 1 like(MYT1L)                                              | 3,51    |
| ENSOCUG00000027771 | zymogen granule membrane protein 16-like(LOC100359023)                                 | 3,52    |
| ENSOCUG00000017790 | steroid 17-alpha-hydroxylase/17,20 lyase(LOC100346394)                                 | 3,58    |
| ENSOCUG00000008181 | carboxypeptidase E(CPE)                                                                | 3,60    |
| ENSOCUG00000012592 | ankyrin repeat and SOCS box containing 5(ASB5)                                         | 3,65    |
| ENSOCUG00000005979 | chromosome 15 open reading frame, human C4orf17(C15H4orf17)                            | 3,66    |
| ENSOCUG00000022883 | glycerophosphodiester phosphodiesterase domain containing 3(GDPD3)                     | 3,66    |
| ENSOCUG00000004205 | protease, serine 35(PRSS35)                                                            | 3,95    |
| ENSOCUG00000029412 | zymogen granule membrane protein 16-like(LOC100352055)                                 | 4,02    |
| ENSOCUG00000003021 | ceramide kinase like(CERKL)                                                            | 4,59    |
| ENSOCUG00000027755 | putative spermatogenesis-associated protein 31D3(LOC100355671)                         | 4,81    |
| ENSOCUG00000017941 | platelet microbicidal protein 1(LOC100008921)                                          | 5,67    |
| ENSOCUG00000000901 | seizure related 6 homolog like 2(SEZ6L2)                                               | 6,23    |
| ENSOCUG00000029318 | zymogen granule membrane protein 16-like(LOC100351054)                                 | 6,75    |
| ENSOCUG00000015803 | tubulointerstitial nephritis antigen(TINAG)                                            | 7,38    |
| ENSOCUG00000029735 | carboxypeptidase E(LOC100343425)                                                       | 10,72   |
| ENSOCUG00000000199 | deuterosome assembly protein 1(DEUP1)                                                  | < -0,01 |
| ENSOCUG00000000315 | glutamate ionotropic receptor AMPA type subunit 3(GRIA3)                               | < -0,01 |
| ENSOCUG00000000341 | regulator of G-protein signaling 6(RGS6)                                               | < -0,01 |
| ENSOCUG00000000774 | protocadherin 9(PCDH9)                                                                 | < -0,01 |
| ENSOCUG00000001022 | solute carrier family 13 member 1(SLC13A1)                                             | < -0,01 |
| ENSOCUG00000001703 | cation channel sperm associated 3(CATSPER3)                                            | < -0,01 |
| ENSOCUG00000002830 | tensin 4(TNS4)                                                                         | < -0,01 |
| ENSOCUG00000003724 | multiple EGF like domains 10(MEGF10)                                                   | < -0,01 |
| ENSOCUG00000004480 | cysteine and glycine rich protein 3(CSRP3)                                             | < -0,01 |
| ENSOCUG00000006146 | paired box 7(PAX7)                                                                     | < -0,01 |
| ENSOCUG00000006307 | translin associated factor X interacting protein 1(TSNAXIP1)                           | < -0,01 |
| ENSOCUG00000006728 | myomesin 3(MYOM3)                                                                      | < -0,01 |
| ENSOCUG00000011270 | CD1b molecule(CD1B)                                                                    | < -0,01 |
| ENSOCUG00000014011 | glutamate receptor interacting protein 1(GRIP1)                                        | < -0,01 |
| ENSOCUG00000014187 | KIAA1024 ortholog(KIAA1024)                                                            | < -0,01 |
| ENSOCUG00000015507 | sushi domain containing 5(SUSD5)                                                       | < -0,01 |
| ENSOCUG00000016053 | RAB44, member RAS oncogene family(RAB44)                                               | < -0,01 |
| ENSOCUG00000016787 | serpin family B member 5(SERPINB5)                                                     | < -0,01 |
| ENSOCUG00000016970 | dynein heavy chain domain 1(DNHD1)                                                     | < -0,01 |
| ENSOCUG00000022989 | ring finger protein 32(RNF32)                                                          | < -0,01 |
| ENSOCUG00000027297 | EF-hand calcium binding domain 8(EFCAB8)                                               | < -0,01 |
| ENSOCUG00000027575 | potassium voltage-gated channel subfamily H member 2(KCNH2)                            | < -0,01 |
| ENSOCUG00000001040 | nei like DNA glycosylase 3(NEIL3)                                                      | < -0,02 |
| ENSOCUG00000001986 | phospholipase C delta 4(PLCD4)                                                         | < -0,02 |
| ENSOCUG00000005563 | lysosomal associated membrane protein 3(LAMP3)                                         | < -0,02 |
| ENSOCUG00000006290 | leucine-rich repeat and fibronectin type-III domain-containing protein 5(LOC100349270) | < -0,02 |
| ENSOCUG00000009933 | germinal center associated signaling and motility(GCSAM)                               | < -0,02 |
| ENSOCUG00000011975 | zinc finger and BTB domain containing 8B(ZBTB8B)                                       | < -0,02 |
| ENSOCUG00000015565 | potassium voltage-gated channel subfamily J member 5(KCNJ5)                            | < -0,02 |

|                    |                                                                       |         |
|--------------------|-----------------------------------------------------------------------|---------|
| ENSOCUG00000021520 | RASD family member 2(RASD2)                                           | < -0,02 |
| ENSOCUG00000021659 | arachidonate 12-lipoxygenase, 12S type(ALOX12)                        | < -0,02 |
| ENSOCUG00000023547 | tubulin alpha-3 chain(LOC100350967)                                   | < -0,02 |
| ENSOCUG00000026674 | granzyme A(LOC100346200)                                              | < -0,02 |
| ENSOCUG00000027210 | Fc fragment of IgG binding protein(FCGBP)                             | < -0,02 |
| ENSOCUG00000027997 | tescalcin(TESC)                                                       | < -0,02 |
| ENSOCUG00000000883 | transketolase-like 1(TKTL1)                                           | < -0,03 |
| ENSOCUG00000006061 | thymocyte selection associated(THEMIS)                                | < -0,03 |
| ENSOCUG00000010009 | eosinophil peroxidase(EPX)                                            | < -0,03 |
| ENSOCUG00000012981 | tropomodulin 2(TMOD2)                                                 | < -0,03 |
| ENSOCUG00000023285 | trophinin associated protein(TROAP)                                   | < -0,03 |
| ENSOCUG00000029569 | keratin 17(KRT17)                                                     | < -0,03 |
| ENSOCUG00000006579 | sphingosine kinase 1(SPHK1)                                           | < -0,04 |
| ENSOCUG00000007567 | solute carrier family 38 member 11(SLC38A11)                          | < -0,04 |
| ENSOCUG00000011561 | olfactory receptor 1J1(LOC100345888)                                  | < -0,04 |
| ENSOCUG00000016659 | embigin(EMB)                                                          | < -0,04 |
| ENSOCUG00000026537 | membrane spanning 4-domains A18(MS4A18)                               | < -0,04 |
| ENSOCUG00000000194 | early growth response 3(EGR3)                                         | < -0,05 |
| ENSOCUG00000000793 | calcineurin like EF-hand protein 2(CHP2)                              | < -0,05 |
| ENSOCUG00000001178 | family with sequence similarity 78 member B(FAM78B)                   | < -0,05 |
| ENSOCUG00000011516 | adenylate kinase 7(AK7)                                               | < -0,05 |
| ENSOCUG00000014829 | synaptotagmin 1(SYT1)                                                 | < -0,05 |
| ENSOCUG00000023952 | netrin G1(NTNG1)                                                      | < -0,05 |
| ENSOCUG00000004004 | family with sequence similarity 135 member B(FAM135B)                 | < -0,06 |
| ENSOCUG00000004369 | chromosome 3 open reading frame, human C5orf46(C3H5orf46)             | < -0,06 |
| ENSOCUG00000008657 | cell growth regulator with EF-hand domain 1(CGREF1)                   | < -0,06 |
| ENSOCUG00000027283 | solute carrier family 25 member 45(SLC25A45)                          | < -0,06 |
| ENSOCUG00000009843 | SPARC/osteonectin, cwcv and kazal like domains proteoglycan 1(SPOCK1) | < -0,07 |
| ENSOCUG00000014008 | chromatin assembly factor 1 subunit B(CHAF1B)                         | < -0,07 |
| ENSOCUG00000004603 | retinal degeneration 3(RD3)                                           | < -0,08 |
| ENSOCUG00000013829 | potassium channel tetramerization domain containing 4(KCTD4)          | < -0,08 |
| ENSOCUG00000009695 | EPS8 like 3(EPS8L3)                                                   | < -0,09 |
| ENSOCUG00000017737 | purinergic receptor P2X 2(P2RX2)                                      | < -0,11 |
| ENSOCUG00000006014 | phosphodiesterase 6H(PDE6H)                                           | < -0,14 |
| ENSOCUG00000003089 | proteoglycan 3, pro eosinophil major basic protein 2(PRG3)            | < -0,32 |
| ENSOCUG00000003984 | solute carrier family 8 member A3(SLC8A3)                             | > 0,01  |
| ENSOCUG00000006597 | calmegin(CLGN)                                                        | > 0,01  |
| ENSOCUG00000014837 | solute carrier family 39 member 12(SLC39A12)                          | > 0,01  |
| ENSOCUG00000017128 | neuromedin U(NMU)                                                     | > 0,01  |
| ENSOCUG00000017476 | epoxide hydrolase 4(EPHX4)                                            | > 0,01  |
| ENSOCUG00000021711 | protein phosphatase 1 regulatory inhibitor subunit 1B(PPP1R1B)        | > 0,01  |
| ENSOCUG00000027106 | hyaluronan synthase 2(HAS2)                                           | > 0,01  |
| ENSOCUG00000004691 | prominin 2(PROM2)                                                     | > 0,02  |
| ENSOCUG00000004847 | growth associated protein 43(GAP43)                                   | > 0,02  |
| ENSOCUG00000011440 | glutamate ionotropic receptor delta type subunit 2(GRID2)             | > 0,02  |
| ENSOCUG00000012760 | zinc finger and BTB domain containing 32(ZBTB32)                      | > 0,02  |
| ENSOCUG00000015813 | neuromedin U receptor 1(NMUR1)                                        | > 0,02  |
| ENSOCUG00000024593 | aldehyde oxidase 4(AOX4)                                              | > 0,02  |



|                    |                                                            |        |
|--------------------|------------------------------------------------------------|--------|
| ENSOCUG00000028202 | family with sequence similarity 178 member B(FAM178B)      | > 0,02 |
| ENSOCUG00000001290 | synaptotagmin 12(SYT12)                                    | > 0,03 |
| ENSOCUG00000004746 | spermatogenesis associated 16(SPATA16)                     | > 0,03 |
| ENSOCUG00000002301 | cyclin B1 interacting protein 1(CCNB1IP1)                  | > 0,04 |
| ENSOCUG00000002624 | Nik related kinase(NRK)                                    | > 0,07 |
| ENSOCUG00000004047 | spindle and kinetochore associated complex subunit 3(SKA3) | > 0,08 |
| ENSOCUG00000029446 | tripartite motif containing 60(TRIM60)                     | > 0,12 |
| ENSOCUG00000003481 | RERG like(RERGL)                                           | > 0,14 |
| ENSOCUG00000026203 | complement C1q like 1(C1QL1)                               | > 0,14 |

---

**Supplementary Table S12.** Functional analysis of the differentially expressed transcripts in liver tissue between vitrified-transferred progeny and that naturally-conceived in F3.

| Category | Term                                                                  | Count | P-Value |
|----------|-----------------------------------------------------------------------|-------|---------|
| BP       | chemotaxis                                                            | 13    | 0,000   |
| BP       | immune response                                                       | 18    | 0,000   |
| BP       | inflammatory response                                                 | 16    | 0,000   |
| BP       | arachidonic acid metabolic process                                    | 5     | 0,001   |
| BP       | integrin-mediated signaling pathway                                   | 9     | 0,002   |
| BP       | cell adhesion                                                         | 13    | 0,002   |
| BP       | linoleic acid metabolic process                                       | 4     | 0,003   |
| BP       | lipoxygenase pathway                                                  | 4     | 0,003   |
| BP       | hematopoietic progenitor cell differentiation                         | 9     | 0,003   |
| BP       | regulation of autophagy                                               | 5     | 0,009   |
| BP       | sperm capacitation                                                    | 4     | 0,011   |
| BP       | regulation of ventricular cardiac muscle cell membrane repolarization | 4     | 0,015   |
| BP       | T cell receptor signaling pathway                                     | 6     | 0,015   |
| BP       | B cell receptor signaling pathway                                     | 5     | 0,018   |
| BP       | ventral spinal cord development                                       | 3     | 0,018   |
| BP       | lipid transport                                                       | 5     | 0,024   |
| BP       | negative regulation of tumor necrosis factor production               | 5     | 0,024   |
| BP       | positive regulation of defense response to virus by host              | 9     | 0,025   |
| BP       | locomotion involved in locomotory behavior                            | 3     | 0,027   |
| BP       | glial cell differentiation                                            | 3     | 0,027   |
| BP       | regulation of calcium ion-dependent exocytosis                        | 3     | 0,027   |
| BP       | neuronal action potential propagation                                 | 3     | 0,027   |
| BP       | positive regulation of neutrophil chemotaxis                          | 4     | 0,027   |
| BP       | neutrophil chemotaxis                                                 | 5     | 0,027   |
| BP       | phagocytosis, recognition                                             | 3     | 0,036   |
| BP       | GTP metabolic process                                                 | 3     | 0,036   |
| BP       | transmembrane transport                                               | 8     | 0,037   |
| BP       | positive regulation of cytokine secretion                             | 4     | 0,038   |
| BP       | positive regulation of type I interferon production                   | 3     | 0,047   |
| BP       | skeletal muscle fiber development                                     | 4     | 0,051   |
| BP       | positive regulation of gene expression                                | 11    | 0,052   |
| BP       | signal transduction                                                   | 14    | 0,053   |
| BP       | positive regulation of vascular endothelial growth factor production  | 4     | 0,058   |
| BP       | receptor clustering                                                   | 3     | 0,059   |
| BP       | cellular response to exogenous dsRNA                                  | 3     | 0,059   |
| BP       | behavioral response to pain                                           | 3     | 0,059   |
| BP       | response to oxidative stress                                          | 6     | 0,063   |
| BP       | defense response to virus                                             | 7     | 0,070   |
| BP       | homophilic cell adhesion via plasma membrane adhesion molecules       | 7     | 0,070   |
| BP       | negative regulation of T cell activation                              | 3     | 0,071   |
| BP       | peripheral nervous system development                                 | 3     | 0,071   |
| BP       | regulation of signal transduction                                     | 3     | 0,071   |

|    |                                                               |     |       |
|----|---------------------------------------------------------------|-----|-------|
| BP | calcium-mediated signaling                                    | 4   | 0,082 |
| BP | sodium ion transport                                          | 4   | 0,082 |
| BP | secretory granule localization                                | 2   | 0,088 |
| BP | positive regulation of hydrolase activity                     | 2   | 0,088 |
| BP | positive regulation of toll-like receptor 7 signaling pathway | 2   | 0,088 |
| BP | Fc-epsilon receptor signaling pathway                         | 2   | 0,088 |
| BP | enzyme linked receptor protein signaling pathway              | 2   | 0,088 |
| BP | positive regulation of toll-like receptor 9 signaling pathway | 2   | 0,088 |
| BP | cyclooxygenase pathway                                        | 2   | 0,088 |
| BP | regulation of NADP metabolic process                          | 2   | 0,088 |
| BP | cell-cell adhesion mediated by cadherin                       | 2   | 0,088 |
| BP | positive regulation of protein kinase activity                | 4   | 0,090 |
| BP | positive regulation of cell migration                         | 8   | 0,091 |
| BP | xenophagy                                                     | 7   | 0,093 |
| BP | innate immune response                                        | 8   | 0,095 |
| BP | transmission of nerve impulse                                 | 3   | 0,098 |
| BP | neuromuscular synaptic transmission                           | 3   | 0,098 |
| BP | heterotypic cell-cell adhesion                                | 3   | 0,098 |
| BP | long-term synaptic potentiation                               | 4   | 0,099 |
| BP | regulation of heart rate by cardiac conduction                | 4   | 0,099 |
| CC | integral component of membrane                                | 212 | 0,000 |
| CC | extracellular matrix                                          | 13  | 0,000 |
| CC | cell surface                                                  | 26  | 0,000 |
| CC | zymogen granule membrane                                      | 5   | 0,005 |
| CC | receptor complex                                              | 10  | 0,008 |
| CC | intracellular membrane-bounded organelle                      | 8   | 0,020 |
| CC | extracellular space                                           | 38  | 0,033 |
| CC | apical plasma membrane                                        | 12  | 0,034 |
| CC | brush border membrane                                         | 4   | 0,039 |
| CC | proteinaceous extracellular matrix                            | 11  | 0,050 |
| CC | extracellular exosome                                         | 96  | 0,051 |
| CC | node of Ranvier                                               | 3   | 0,053 |
| CC | voltage-gated potassium channel complex                       | 6   | 0,056 |
| CC | neuronal cell body                                            | 9   | 0,056 |
| CC | MHC class II protein complex                                  | 3   | 0,077 |
| CC | phagocytic cup                                                | 3   | 0,077 |
| MF | calcium ion binding                                           | 39  | 0,000 |
| MF | peroxidase activity                                           | 5   | 0,000 |
| MF | carbohydrate binding                                          | 9   | 0,006 |
| MF | non-membrane spanning protein tyrosine kinase activity        | 6   | 0,006 |
| MF | arachidonate 12-lipoxygenase activity                         | 3   | 0,009 |
| MF | glycoprotein binding                                          | 6   | 0,026 |
| MF | hyaluronic acid binding                                       | 4   | 0,027 |
| MF | 3',5'-cyclic-nucleotide phosphodiesterase activity            | 3   | 0,029 |
| MF | protein tyrosine phosphatase activity                         | 8   | 0,036 |
| MF | transmembrane signaling receptor activity                     | 5   | 0,036 |
| MF | phospholipid binding                                          | 5   | 0,040 |
| MF | phosphatidylserine binding                                    | 4   | 0,048 |

|      |                                                                                   |    |       |
|------|-----------------------------------------------------------------------------------|----|-------|
| MF   | transporter activity                                                              | 8  | 0,050 |
| MF   | heparin binding                                                                   | 7  | 0,064 |
| MF   | voltage-gated calcium channel activity                                            | 4  | 0,067 |
| MF   | C-C chemokine receptor activity                                                   | 3  | 0,067 |
| MF   | secondary active sulfate transmembrane transporter activity                       | 3  | 0,067 |
| MF   | voltage-gated potassium channel activity                                          | 5  | 0,077 |
| MF   | iron ion binding                                                                  | 10 | 0,077 |
| MF   | prostaglandin-endoperoxide synthase activity                                      | 2  | 0,077 |
| MF   | proton-dependent oligopeptide secondary active transmembrane transporter activity | 2  | 0,077 |
| MF   | dioxygenase activity                                                              | 2  | 0,077 |
| KEGG | Staphylococcus aureus infection                                                   | 11 | 0,000 |
| KEGG | Cell adhesion molecules (CAMs)                                                    | 16 | 0,000 |
| KEGG | Serotonergic synapse                                                              | 13 | 0,000 |
| KEGG | Calcium signaling pathway                                                         | 17 | 0,001 |
| KEGG | Chemokine signaling pathway                                                       | 16 | 0,001 |
| KEGG | Long-term depression                                                              | 9  | 0,001 |
| KEGG | Platelet activation                                                               | 13 | 0,002 |
| KEGG | Retrograde endocannabinoid signaling                                              | 11 | 0,002 |
| KEGG | Asthma                                                                            | 6  | 0,003 |
| KEGG | Rap1 signaling pathway                                                            | 17 | 0,005 |
| KEGG | Neuroactive ligand-receptor interaction                                           | 19 | 0,005 |
| KEGG | Hematopoietic cell lineage                                                        | 9  | 0,005 |
| KEGG | Oxytocin signaling pathway                                                        | 13 | 0,006 |
| KEGG | Type I diabetes mellitus                                                          | 7  | 0,007 |
| KEGG | Fc gamma R-mediated phagocytosis                                                  | 9  | 0,007 |
| KEGG | Graft-versus-host disease                                                         | 6  | 0,010 |
| KEGG | Regulation of lipolysis in adipocytes                                             | 7  | 0,010 |
| KEGG | Circadian entrainment                                                             | 9  | 0,010 |
| KEGG | ECM-receptor interaction                                                          | 9  | 0,010 |
| KEGG | Glutamatergic synapse                                                             | 10 | 0,012 |
| KEGG | Tuberculosis                                                                      | 14 | 0,012 |
| KEGG | PI3K-Akt signaling pathway                                                        | 20 | 0,016 |
| KEGG | Leishmaniasis                                                                     | 8  | 0,016 |
| KEGG | Fc epsilon RI signaling pathway                                                   | 7  | 0,017 |
| KEGG | Dopaminergic synapse                                                              | 10 | 0,021 |
| KEGG | Inflammatory mediator regulation of TRP channels                                  | 9  | 0,025 |
| KEGG | Cytokine-cytokine receptor interaction                                            | 14 | 0,025 |
| KEGG | Morphine addiction                                                                | 8  | 0,029 |
| KEGG | VEGF signaling pathway                                                            | 6  | 0,033 |
| KEGG | Ovarian steroidogenesis                                                           | 6  | 0,036 |
| KEGG | Viral myocarditis                                                                 | 7  | 0,036 |
| KEGG | Intestinal immune network for IgA production                                      | 6  | 0,039 |
| KEGG | Arachidonic acid metabolism                                                       | 8  | 0,040 |
| KEGG | Glycerophospholipid metabolism                                                    | 8  | 0,042 |
| KEGG | Rheumatoid arthritis                                                              | 8  | 0,042 |
| KEGG | Phosphatidylinositol signaling system                                             | 8  | 0,044 |
| KEGG | Aldosterone synthesis and secretion                                               | 7  | 0,048 |

|      |                                           |    |       |
|------|-------------------------------------------|----|-------|
| KEGG | mTOR signaling pathway                    | 6  | 0,053 |
| KEGG | Allograft rejection                       | 5  | 0,061 |
| KEGG | Natural killer cell mediated cytotoxicity | 8  | 0,061 |
| KEGG | Axon guidance                             | 9  | 0,069 |
| KEGG | Salivary secretion                        | 7  | 0,074 |
| KEGG | Phagosome                                 | 10 | 0,082 |
| KEGG | Type II diabetes mellitus                 | 5  | 0,084 |
| KEGG | Amoebiasis                                | 8  | 0,084 |
| KEGG | Thyroid hormone synthesis                 | 6  | 0,091 |

---

\*Functional analysis was referred to the GO term annotation according to the biological process (BP), cellular component (CC) and molecular function (MF) classification, and the KEGG pathways in which they are involved.

**Supplementary Table S13.** Targeted identification of differentially accumulated metabolites in liver tissue between vitrified- transferred progeny and that naturally-conceived in F1, F2 and F3 generations.

| Metabolic pathway          | Metabolite name                | Fold change  | Fold change  | Fold change  |
|----------------------------|--------------------------------|--------------|--------------|--------------|
|                            |                                | F1           | F2           | F3           |
| Glycolysis/Gluconeogenesis | glycerate-3P                   | 0,70         | <b>3,47</b>  | <b>2,55</b>  |
|                            | ThPP                           | 2,56         | <b>1,44</b>  | <b>1,64</b>  |
|                            | 2-hydroxy-ethyl-ThPP           | 0,93         | 0,04         | <b>0,86</b>  |
|                            | β-D-Glucose-6P                 | -0,22        | -0,07        | 0,21         |
|                            | glycerate-1,3P2                | -0,41        | <b>-0,64</b> | 0,19         |
|                            | glyceraldehyde-3P              | <b>-1,58</b> | -1,15        | -0,18        |
|                            | S-Acetyl-Dihydrolipoamide-E    | <b>0,61</b>  | -0,07        | <b>0,34</b>  |
|                            | Lipoamide-E                    | <b>-0,54</b> | <b>-0,23</b> | -0,37        |
|                            | β-D-Fructose-1,6P2             | <b>-0,98</b> | 0,55         | -0,53        |
|                            | cAMP                           | <b>-0,61</b> | 0,34         | 0,51         |
| Citrate cycle (TCA cycle)  | oxalosuccinate                 | <b>3,59</b>  | <b>2,52</b>  | <b>2,12</b>  |
|                            | ThPP                           | 2,56         | <b>1,44</b>  | <b>1,64</b>  |
|                            | 2-hydroxy-ethyl-ThPP           | 0,93         | 0,04         | <b>0,86</b>  |
|                            | succinate                      | <b>-0,64</b> | <b>-0,40</b> | 0,15         |
|                            | cis-aconitate                  | 0,00         | 0,10         | 0,13         |
|                            | S-Acetyl-Dihydrolipoamide-E    | <b>0,61</b>  | -0,07        | <b>0,34</b>  |
|                            | citrate                        | <b>-0,62</b> | <b>-0,82</b> | -0,18        |
|                            | Lipoamide-E                    | <b>-0,54</b> | <b>-0,23</b> | -0,37        |
|                            | 3-carboxy-1-hydroxypropyl-ThPP | <b>2,65</b>  | 0,41         | -1,06        |
|                            | Biosynthesis of amino acids    | arginine     | -0,07        | -0,03        |
| asparagine                 |                                | 0,05         | -0,04        | 0,30         |
| aspartate                  |                                | -0,04        | -0,04        | 0,31         |
| cysteine                   |                                | <b>-2,38</b> | <b>-2,32</b> | -2,11        |
| glutamic_acid              |                                | 0,12         | 0,05         | 0,35         |
| glutamine                  |                                | -0,44        | -0,69        | -0,05        |
| histidine                  |                                | -0,12        | -0,03        | 0,25         |
| isoleucine-leucine         |                                | 0,31         | -0,15        | 0,50         |
| lysine                     |                                | 0,09         | 0,19         | -0,01        |
| methionine                 |                                | 0,19         | <b>-0,27</b> | 0,39         |
| phenylalanine              |                                | 0,03         | -0,08        | 0,29         |
| proline                    |                                | 0,20         | -0,25        | 0,38         |
| serine                     |                                | 0,17         | <b>-0,66</b> | -1,85        |
| threonine                  |                                | 0,24         | 0,09         | 0,34         |
| tryptophan                 |                                | <b>-5,51</b> | <b>-2,04</b> | <b>-1,25</b> |
| tyrosine                   | 0,44                           | -0,10        | 0,51         |              |
| valine                     | 0,36                           | 0,01         | 0,92         |              |
| Oxidative phosphorylation  | NADH                           | <b>-2,99</b> | <b>-1,33</b> | 1,31         |
|                            | fumarate                       | -0,22        | -0,18        | 0,30         |
|                            | gluconate                      | -0,73        | -0,69        | 0,00         |
|                            | succinate                      | <b>-0,64</b> | <b>-0,40</b> | 0,15         |
|                            | adenosine_diphosphate          | 0,47         | -0,07        | 0,09         |
|                            | FAD2+                          | 0,03         | -0,03        | -0,17        |
|                            | glucose                        | <b>0,95</b>  | 0,21         | -0,51        |

|                                         |                                                     |                |              |              |              |
|-----------------------------------------|-----------------------------------------------------|----------------|--------------|--------------|--------------|
|                                         | Adrenic_acid                                        | <b>-0,65</b>   | <b>0,74</b>  | <b>-0,85</b> |              |
|                                         | Arachidic_acid                                      | 0,32           | <b>-0,96</b> | <b>-0,64</b> |              |
|                                         | Arachidonic_acid                                    | <b>-0,13</b>   | <b>0,78</b>  | <b>-0,59</b> |              |
|                                         | Behenic_acid                                        | 0,85           | 0,34         | -0,55        |              |
|                                         | Docosadienoic_acid                                  | -0,39          | <b>0,37</b>  | -0,44        |              |
|                                         | Docosahexaenoic_acid                                | -0,09          | 0,26         | -0,37        |              |
|                                         | Docosapentaenoic_acid                               | <b>-0,40</b>   | <b>0,50</b>  | <b>-0,78</b> |              |
|                                         | Erucic_acid                                         | -0,09          | <b>-0,07</b> | <b>-0,27</b> |              |
| Biosynthesis of unsaturated fatty acids | Icosadienoic_acid                                   | -0,10          | <b>0,39</b>  | -0,23        |              |
|                                         | Icosapentaenoic_acid                                | <b>0,10</b>    | <b>0,42</b>  | -0,34        |              |
|                                         | Icosatrienoic_acid                                  | -0,09          | <b>0,53</b>  | -0,41        |              |
|                                         | Icosaenoic_acid                                     | 0,00           | -0,01        | -0,15        |              |
|                                         | Lignoceric_acid                                     | 0,99           | 0,05         | -0,29        |              |
|                                         | Linoleic_acid                                       | -0,07          | <b>0,50</b>  | <b>-0,72</b> |              |
|                                         | Nervonic_acid                                       | <b>0,24</b>    | <b>0,24</b>  | <b>-0,59</b> |              |
|                                         | Oleic_acid                                          | -0,07          | 0,04         | <b>-0,55</b> |              |
|                                         | $\alpha$ -Linolenic_acid                            | <b>0,29</b>    | 0,20         | <b>-0,62</b> |              |
|                                         | Palmitic_acid                                       | 0,06           | <b>-0,15</b> | <b>-0,36</b> |              |
|                                         | Stearic_acid                                        | <b>0,50</b>    | <b>0,32</b>  | <b>-0,24</b> |              |
|                                         | <hr/>                                               |                |              |              |              |
|                                         |                                                     | 11,14,15-theta | <b>1,16</b>  | <b>-1,14</b> | -0,50        |
|                                         |                                                     | hepoxilin_A3   | 0,32         | 0,21         | 0,36         |
|                                         | leukotriene_F4                                      | 0,64           | -0,03        | 0,27         |              |
|                                         | 11-dehydro_Thromboxane_B2                           | 0,53           | 0,15         | 0,23         |              |
|                                         | 6-Ketoprostaglandin_E1                              | -0,08          | -0,16        | 0,18         |              |
|                                         | Trioxilin_A3                                        | 0,05           | 0,12         | 0,20         |              |
|                                         | 5,6-Dihydroxy-8Z,11Z,14Z-eicosatrienoic_acid        | <b>1,18</b>    | <b>-1,08</b> | 0,06         |              |
|                                         | 6-Ketoprostaglandin_E1                              | <b>0,78</b>    | <b>-0,47</b> | -0,08        |              |
|                                         | Tetrahydro-3,4-furandiol                            | 0,13           | 0,09         | -0,29        |              |
|                                         | prostaglandin_B2                                    | <b>-0,80</b>   | <b>-0,84</b> | -0,33        |              |
| Arachidonic acid metabolism             | 11,14,15-theta                                      | <b>1,16</b>    | <b>-1,14</b> | -0,50        |              |
|                                         | 15-Keto-prostaglandin_F2alpha                       | <b>-0,74</b>   | <b>-1,03</b> | -0,37        |              |
|                                         | 5-Oxo-EETE                                          | <b>0,66</b>    | -0,38        | -0,47        |              |
|                                         | 5-HETE                                              | <b>0,36</b>    | -0,07        | <b>-0,50</b> |              |
|                                         | 11(12)oxido-5,8,14-eicosatrienoic_acid              | <b>0,43</b>    | -0,12        | <b>-0,52</b> |              |
|                                         | 14,15-dihydroxy-5,-8,11-eicosatrienoic_acid         | 0,35           | 0,01         | <b>-0,72</b> |              |
|                                         | 5(6)oxido-8,11,14-eicosatrienoic_acid               | 0,16           | 0,38         | <b>-0,96</b> |              |
|                                         | Lecithins                                           | 0,18           | -0,68        | <b>-1,25</b> |              |
|                                         | 11,12,19-/11,12,20-trihydroxy-5,8,14-eicosatrienoic | <b>1,24</b>    | <b>-1,21</b> | <b>-0,66</b> |              |
|                                         | 14,15,19-/14,15,20-trihydroxy-5,8,11-eicosatrienoic | <b>1,05</b>    | <b>-0,55</b> | -0,36        |              |
|                                         | Prostacyclin                                        | <b>0,87</b>    | <b>-1,11</b> | -0,50        |              |
|                                         | <hr/>                                               |                |              |              |              |
|                                         | Phosphatidylcholines                                | PC_(36:5)      | <b>-0,57</b> | 0,31         | <b>-1,00</b> |
|                                         |                                                     | PC_(38:7)      | 0,22         | 0,04         | -0,26        |
| PC_(34:4)                               |                                                     | <b>-0,76</b>   | 0,61         | <b>-0,81</b> |              |
| PC_(30:3)                               |                                                     | -0,27          | 0,02         | <b>-0,77</b> |              |
| PC_(40:6)                               |                                                     | <b>0,58</b>    | <b>-0,64</b> | -0,27        |              |
| PC_(38:6)                               |                                                     | -0,25          | 0,25         | -0,47        |              |

|                         |                           |              |              |              |
|-------------------------|---------------------------|--------------|--------------|--------------|
|                         | PC_(36:4)                 | <b>-0,58</b> | 0,38         | <b>-0,83</b> |
|                         | PC_(30:0)                 | <b>-0,49</b> | -0,02        | <b>-0,96</b> |
|                         | PC_(34:1)                 | -0,45        | 0,01         | -0,51        |
|                         | PC_(34:2)                 | <b>-0,43</b> | 0,03         | <b>-0,70</b> |
|                         | PC_(38:5)                 | <b>-0,42</b> | 0,33         | <b>-0,69</b> |
|                         | PC_(36:3)                 | <b>-0,46</b> | 0,27         | <b>-0,71</b> |
|                         | PC_(38:4)                 | <b>-0,49</b> | 0,58         | <b>-0,74</b> |
|                         | PC_(34:0)                 | -0,32        | -0,54        | -0,61        |
|                         | PC_(32:1)                 | -0,46        | 0,08         | <b>-0,79</b> |
|                         | PC_(36:1)                 | -0,13        | -0,11        | <b>-0,86</b> |
|                         | PC_(32:0)                 | <b>-0,54</b> | -0,37        | -0,43        |
|                         | PC_(34:6)                 | -0,55        | -0,63        | <b>-0,87</b> |
|                         | PC_(36:2)                 | -0,10        | -0,13        | <b>-0,92</b> |
| Sphingolipid metabolism | SM_(18:0)                 | -0,21        | 0,21         | <b>-0,80</b> |
|                         | SM_(d34:0)                | 0,05         | -0,24        | -0,54        |
|                         | SM_(16:0)                 | -0,19        | -0,32        | <b>-0,71</b> |
| Cholesterol metabolism  | cholesterol               | <b>-0,20</b> | -0,07        | -0,17        |
|                         | cholesterol_alpha-epoxide | 0,04         | -0,03        | <b>-0,48</b> |
| Glycerolipid metabolism | TAG_(50:1)                | <b>1,71</b>  | <b>0,46</b>  | <b>-1,84</b> |
|                         | TAG_(50:4)                | <b>1,40</b>  | -0,58        | <b>-1,95</b> |
|                         | TAG_(54:5)                | <b>0,28</b>  | <b>1,57</b>  | <b>-1,02</b> |
|                         | TAG_(54:8)                | <b>0,81</b>  | <b>1,38</b>  | <b>-1,56</b> |
|                         | TAG_(52:1)                | <b>1,59</b>  | <b>0,43</b>  | <b>-1,13</b> |
|                         | TAG_(52:2)                | <b>1,10</b>  | <b>0,68</b>  | <b>-1,07</b> |
|                         | TAG_(54:9)                | <b>2,01</b>  | <b>-0,70</b> | <b>-1,34</b> |
|                         | TAG_(50:0)                | <b>1,83</b>  | <b>1,07</b>  | <b>-1,35</b> |

Red denotes statistical differences at  $p < 0.05$ .



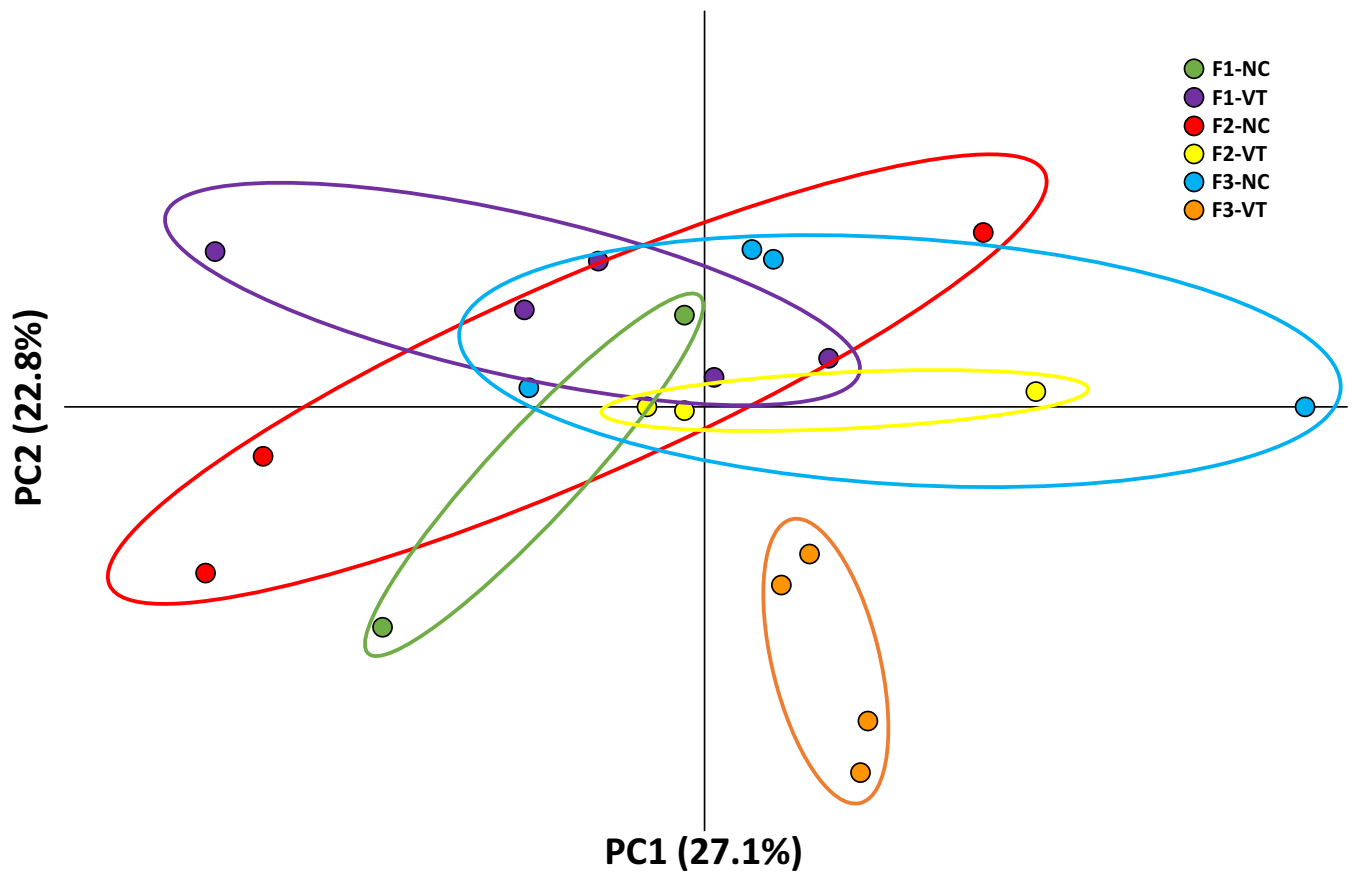

**Supplementary Fig. S1.** Principal component analysis, assessing the expression profile variability of each sample in each generation. Adjusted color ellipses indicate the dispersion of the samples by experimental group (NC:naturally-conceived; VT:vitrified-transferred) and generation (F1, F2 and F3).
